# Supplementary material
Source: MDPI journal article supplement (https://www.mdpi.com/2073-4344/13/2/317)
Supplement: s1 [file s1]

## Supporting Information

**Table S1.** Xyz coordinates and absolute energies (in a.u.) of all computed DFT species.

224

cat1isomersenseAXIALSVP1 SCF Done: -12499.8399783 A.U.

|    |           |           |           |
|----|-----------|-----------|-----------|
| Cu | -3.341675 | -5.055012 | 2.398731  |
| C  | 0.801113  | 4.334320  | -3.387941 |
| Cu | 2.004373  | 3.283928  | -1.060968 |
| O  | -4.399133 | -3.698465 | 3.347460  |
| C  | -4.027248 | -2.490746 | 3.324818  |
| O  | -3.126514 | -1.992094 | 2.594865  |
| C  | -4.736249 | -1.573239 | 4.269406  |
| O  | 1.171780  | 4.641243  | 0.138014  |
| C  | -5.367382 | -2.103692 | 5.400855  |
| H  | -5.352561 | -3.182714 | 5.560502  |
| O  | 1.767425  | 6.340919  | -1.215354 |
| C  | -6.023285 | 0.123430  | 6.063218  |
| H  | -6.546581 | 0.785879  | 6.758452  |
| C  | -5.419330 | 0.672903  | 4.918499  |
| C  | -4.760039 | -0.196091 | 4.035719  |
| H  | -4.244760 | 0.198185  | 3.157286  |
| C  | -5.487068 | 2.109939  | 4.647077  |
| C  | -5.248954 | 3.155511  | 5.531830  |
| N  | -5.508369 | 4.296953  | 4.829678  |
| N  | -5.867092 | 4.060869  | 3.548768  |
| C  | -5.856054 | 2.740215  | 3.425796  |
| C  | -6.223975 | 2.088411  | 2.145428  |
| H  | -6.792519 | 2.781071  | 1.515450  |
| H  | -6.827982 | 1.185184  | 2.311788  |
| H  | -5.335827 | 1.775840  | 1.575080  |
| C  | -4.754478 | 3.162341  | 6.928754  |
| H  | -3.878108 | 3.819793  | 7.029917  |

|   |           |           |           |
|---|-----------|-----------|-----------|
| H | -4.454281 | 2.150795  | 7.227628  |
| H | -5.516760 | 3.503745  | 7.647018  |
| C | -5.192731 | 5.647943  | 5.211771  |
| H | -5.967218 | 6.314588  | 4.813214  |
| H | -5.188554 | 5.717175  | 6.306386  |
| N | -3.911564 | 6.069880  | 4.713905  |
| N | -2.802307 | 5.589111  | 5.318650  |
| C | -1.800352 | 5.897196  | 4.505344  |
| C | -2.269642 | 6.590178  | 3.349941  |
| C | -3.648097 | 6.666158  | 3.513285  |
| C | -4.710013 | 7.192358  | 2.623620  |
| H | -5.214205 | 8.076264  | 3.045339  |
| H | -5.477064 | 6.426956  | 2.432416  |
| H | -4.281014 | 7.490519  | 1.659213  |
| C | -0.398966 | 5.547606  | 4.852507  |
| H | 0.292335  | 6.371591  | 4.626811  |
| H | -0.041582 | 4.672763  | 4.288980  |
| H | -0.318699 | 5.305113  | 5.918641  |
| C | -1.478209 | 7.103642  | 2.226091  |
| C | -1.644559 | 8.418593  | 1.758283  |
| H | -2.356167 | 9.076850  | 2.264744  |
| C | -0.906565 | 8.896005  | 0.676845  |
| H | -1.049120 | 9.923489  | 0.334134  |
| C | 0.011854  | 8.072442  | 0.033858  |
| H | 0.592767  | 8.427115  | -0.818415 |
| C | 0.186853  | 6.755573  | 0.476878  |
| C | -0.547747 | 6.283626  | 1.570243  |
| H | -0.413254 | 5.246361  | 1.882351  |
| C | 1.119430  | 5.840943  | -0.251497 |
| C | -5.992017 | -1.247660 | 6.303062  |
| H | -6.477195 | -1.654288 | 7.193380  |

|   |           |           |           |
|---|-----------|-----------|-----------|
| O | -4.669163 | -5.092102 | 0.901131  |
| C | -4.757231 | -4.077158 | 0.156604  |
| O | -3.992812 | -3.068268 | 0.172622  |
| C | -5.884569 | -4.030090 | -0.824908 |
| O | 0.550895  | 3.606246  | -2.385225 |
| C | -6.841709 | -5.050508 | -0.860199 |
| H | -6.756521 | -5.885212 | -0.163207 |
| O | 1.876467  | 4.955782  | -3.611821 |
| C | -7.982921 | -3.890423 | -2.650022 |
| H | -8.826675 | -3.830987 | -3.341311 |
| C | -7.028134 | -2.856879 | -2.639046 |
| C | -5.976091 | -2.954665 | -1.714954 |
| H | -5.196932 | -2.192250 | -1.683784 |
| C | -7.123262 | -1.722074 | -3.560720 |
| C | -6.786629 | -0.392437 | -3.313321 |
| N | -7.039266 | 0.278568  | -4.477152 |
| N | -7.501257 | -0.526073 | -5.456440 |
| C | -7.560436 | -1.735764 | -4.919209 |
| C | -8.025433 | -2.890902 | -5.730602 |
| H | -7.941959 | -2.656407 | -6.798455 |
| H | -9.079019 | -3.142313 | -5.534163 |
| H | -7.435970 | -3.795064 | -5.522898 |
| C | -6.287596 | 0.269282  | -2.085544 |
| H | -5.192239 | 0.385903  | -2.084499 |
| H | -6.546077 | -0.324402 | -1.198972 |
| H | -6.717108 | 1.272093  | -1.946081 |
| C | -6.890626 | 1.683491  | -4.754738 |
| H | -7.643843 | 1.925527  | -5.516223 |
| H | -7.099041 | 2.266142  | -3.849743 |
| N | -5.577584 | 2.067609  | -5.211558 |
| N | -5.174796 | 1.668840  | -6.432479 |

|    |           |           |           |
|----|-----------|-----------|-----------|
| C  | -3.974784 | 2.206420  | -6.607463 |
| C  | -3.588525 | 2.977292  | -5.471142 |
| C  | -4.651895 | 2.856748  | -4.584390 |
| C  | -4.828158 | 3.449134  | -3.240099 |
| H  | -4.539228 | 2.757805  | -2.434328 |
| H  | -5.862745 | 3.764581  | -3.044170 |
| H  | -4.189651 | 4.336870  | -3.138445 |
| C  | -3.223669 | 1.993567  | -7.873747 |
| H  | -2.154866 | 1.828716  | -7.683118 |
| H  | -3.293937 | 2.861665  | -8.545493 |
| H  | -3.622300 | 1.126670  | -8.414903 |
| C  | -2.408980 | 3.857826  | -5.380619 |
| C  | -2.279175 | 4.918856  | -6.295553 |
| H  | -3.068072 | 5.075225  | -7.035951 |
| C  | -1.173425 | 5.764092  | -6.268601 |
| H  | -1.093931 | 6.583029  | -6.987351 |
| C  | -0.168429 | 5.562251  | -5.328717 |
| H  | 0.715432  | 6.200579  | -5.299211 |
| C  | -0.282638 | 4.519969  | -4.400507 |
| C  | -1.397503 | 3.674540  | -4.428686 |
| H  | -1.466661 | 2.864595  | -3.699105 |
| C  | -7.885088 | -4.972486 | -1.778195 |
| H  | -8.643681 | -5.758068 | -1.805807 |
| Cu | 3.146597  | 5.231197  | -2.108737 |
| C  | -0.820824 | -4.190908 | 3.326207  |
| Cu | -2.314486 | -3.143759 | 1.176553  |
| O  | 4.348625  | 3.874474  | -2.906293 |
| C  | 3.997229  | 2.660914  | -2.928440 |
| O  | 2.996551  | 2.152983  | -2.349769 |
| C  | 4.869602  | 1.726555  | -3.701881 |
| O  | -1.602106 | -4.537251 | -0.077754 |

|   |           |           |           |
|---|-----------|-----------|-----------|
| C | 5.689363  | 2.217171  | -4.724255 |
| H | 5.700235  | 3.288229  | -4.930991 |
| O | -2.101812 | -6.191587 | 1.370592  |
| C | 6.451252  | -0.032837 | -5.166309 |
| H | 7.090069  | -0.718253 | -5.730365 |
| C | 5.657340  | -0.540610 | -4.122202 |
| C | 4.855677  | 0.360759  | -3.407493 |
| H | 4.194753  | 0.000800  | -2.616621 |
| C | 5.668734  | -1.965498 | -3.783332 |
| C | 5.572390  | -3.041617 | -4.657955 |
| N | 5.682397  | -4.157786 | -3.882144 |
| N | 5.820264  | -3.877869 | -2.566664 |
| C | 5.817650  | -2.552570 | -2.490885 |
| C | 5.979101  | -1.854545 | -1.189162 |
| H | 6.411789  | -2.518906 | -0.430480 |
| H | 6.620166  | -0.966749 | -1.288866 |
| H | 5.013872  | -1.502272 | -0.792123 |
| C | 5.314783  | -3.098212 | -6.115958 |
| H | 4.453966  | -3.747559 | -6.335779 |
| H | 5.085154  | -2.096171 | -6.498054 |
| H | 6.177397  | -3.477105 | -6.686669 |
| C | 5.413010  | -5.516437 | -4.272275 |
| H | 6.109961  | -6.184345 | -3.750843 |
| H | 5.573440  | -5.608489 | -5.353312 |
| N | 4.064230  | -5.913216 | -3.973811 |
| N | 3.066306  | -5.404923 | -4.730890 |
| C | 1.948862  | -5.701099 | -4.078751 |
| C | 2.230611  | -6.419405 | -2.879062 |
| C | 3.616110  | -6.512784 | -2.832223 |
| C | 4.524666  | -7.069228 | -1.802384 |
| H | 5.066333  | -7.961577 | -2.154215 |

|   |           |           |           |
|---|-----------|-----------|-----------|
| H | 5.271311  | -6.323125 | -1.491624 |
| H | 3.952899  | -7.364432 | -0.913916 |
| C | 0.619154  | -5.322924 | -4.622726 |
| H | -0.112852 | -6.133804 | -4.503408 |
| H | 0.201576  | -4.442969 | -4.110700 |
| H | 0.697052  | -5.074746 | -5.687679 |
| C | 1.286463  | -6.955561 | -1.893401 |
| C | 1.374263  | -8.291572 | -1.465143 |
| H | 2.131320  | -8.942462 | -1.911656 |
| C | 0.507250  | -8.795980 | -0.498264 |
| H | 0.591082  | -9.838835 | -0.183882 |
| C | -0.457696 | -7.974432 | 0.074154  |
| H | -1.127837 | -8.342817 | 0.851679  |
| C | -0.562125 | -6.639861 | -0.338446 |
| C | 0.293726  | -6.143581 | -1.326538 |
| H | 0.210603  | -5.093353 | -1.613157 |
| C | -1.512246 | -5.718883 | 0.356385  |
| C | 6.462992  | 1.327899  | -5.464592 |
| H | 7.097504  | 1.700654  | -6.272007 |
| O | 4.275899  | 5.288667  | -0.470563 |
| C | 4.334684  | 4.238825  | 0.227783  |
| O | 3.596116  | 3.219281  | 0.111965  |
| C | 5.407168  | 4.161482  | 1.265228  |
| O | -0.723702 | -3.486672 | 2.279746  |
| C | 6.161408  | 5.291901  | 1.600564  |
| H | 5.951106  | 6.240184  | 1.104236  |
| O | -1.853798 | -4.793288 | 3.728453  |
| C | 7.435618  | 3.952847  | 3.162235  |
| H | 8.250796  | 3.876001  | 3.885867  |
| C | 6.704201  | 2.800700  | 2.822772  |
| C | 5.670255  | 2.937459  | 1.884536  |

|   |          |           |          |
|---|----------|-----------|----------|
| H | 5.044999 | 2.081820  | 1.625018 |
| C | 7.002102 | 1.492490  | 3.409286 |
| C | 6.970610 | 0.263546  | 2.750611 |
| N | 7.296444 | -0.668079 | 3.691877 |
| N | 7.526155 | -0.129828 | 4.910729 |
| C | 7.363214 | 1.178412  | 4.751377 |
| C | 7.535167 | 2.104279  | 5.901034 |
| H | 7.449459 | 1.557418  | 6.847664 |
| H | 8.522189 | 2.591907  | 5.897010 |
| H | 6.783099 | 2.905680  | 5.889607 |
| C | 6.699284 | -0.081814 | 1.336424 |
| H | 5.661049 | -0.411352 | 1.178786 |
| H | 6.875802 | 0.786133  | 0.687899 |
| H | 7.331669 | -0.908804 | 0.985143 |
| C | 7.385853 | -2.099153 | 3.530164 |
| H | 7.895843 | -2.469958 | 4.427849 |
| H | 7.985773 | -2.355573 | 2.647176 |
| N | 6.115456 | -2.757651 | 3.368102 |
| N | 5.705802 | -3.120760 | 2.131671 |
| C | 4.488865 | -3.625218 | 2.301956 |
| C | 4.105345 | -3.589588 | 3.677276 |
| C | 5.191822 | -3.019912 | 4.336639 |
| C | 5.419086 | -2.683638 | 5.762633 |
| H | 5.953108 | -3.485342 | 6.298707 |
| H | 6.015068 | -1.766695 | 5.876246 |
| H | 4.461988 | -2.535648 | 6.279016 |
| C | 3.723738 | -4.158500 | 1.142636 |
| H | 3.179844 | -5.077385 | 1.405357 |
| H | 2.970288 | -3.444060 | 0.776098 |
| H | 4.395256 | -4.377227 | 0.302907 |
| C | 2.851527 | -4.057553 | 4.270424 |

|   |           |           |          |
|---|-----------|-----------|----------|
| C | 2.813791  | -4.704340 | 5.519897 |
| H | 3.746980  | -4.884150 | 6.059363 |
| C | 1.611366  | -5.155478 | 6.061391 |
| H | 1.611335  | -5.660392 | 7.030184 |
| C | 0.416901  | -4.993283 | 5.365031 |
| H | -0.529840 | -5.361292 | 5.762746 |
| C | 0.433310  | -4.350881 | 4.121950 |
| C | 1.637877  | -3.883262 | 3.591236 |
| H | 1.613893  | -3.371548 | 2.628547 |
| C | 7.160659  | 5.181184  | 2.563544 |
| H | 7.749484  | 6.059422  | 2.838016 |

224

cat1isomersenseAXIALSVP2 SCF Done: -12499.8243301 A.U.

|    |           |           |           |
|----|-----------|-----------|-----------|
| Cu | 5.462595  | 0.452008  | 3.542079  |
| C  | -5.483994 | 1.752846  | -1.837197 |
| Cu | -3.578068 | -0.351671 | -1.929125 |
| O  | 6.248260  | 1.771073  | 2.292475  |
| C  | 5.850205  | 1.776191  | 1.092430  |
| O  | 4.832151  | 1.179542  | 0.641033  |
| C  | 6.671747  | 2.558838  | 0.119647  |
| O  | -2.542470 | 0.452491  | -3.424951 |
| C  | 7.851980  | 3.178640  | 0.548351  |
| H  | 8.142656  | 3.099350  | 1.596350  |
| O  | -4.427910 | 0.897285  | -4.577366 |
| C  | 8.241261  | 3.958470  | -1.703492 |
| H  | 8.852889  | 4.523691  | -2.410907 |
| C  | 7.057761  | 3.347396  | -2.156578 |
| C  | 6.282746  | 2.644052  | -1.221248 |
| H  | 5.378288  | 2.120269  | -1.536993 |
| C  | 6.672120  | 3.426404  | -3.566921 |
| C  | 5.398667  | 3.633332  | -4.093588 |



|   |           |           |           |
|---|-----------|-----------|-----------|
| N | 5.553420  | 3.597536  | -5.447448 |
| N | 6.827752  | 3.382650  | -5.831423 |
| C | 7.520275  | 3.286133  | -4.704422 |
| C | 8.982051  | 3.018713  | -4.741239 |
| H | 9.259412  | 2.567036  | -5.701257 |
| H | 9.289082  | 2.339906  | -3.933424 |
| H | 9.578056  | 3.937947  | -4.631483 |
| C | 4.098177  | 3.879826  | -3.427079 |
| H | 3.544640  | 4.708946  | -3.892928 |
| H | 4.254709  | 4.137484  | -2.372096 |
| H | 3.440369  | 2.996924  | -3.462598 |
| C | 4.580004  | 3.837296  | -6.478906 |
| H | 4.343373  | 4.909795  | -6.568830 |
| H | 5.062150  | 3.519251  | -7.414505 |
| N | 3.341097  | 3.138386  | -6.261988 |
| N | 3.361360  | 1.815294  | -6.010234 |
| C | 2.086429  | 1.458296  | -5.912615 |
| C | 1.220805  | 2.570523  | -6.136248 |
| C | 2.076456  | 3.646988  | -6.354973 |
| C | 1.786994  | 5.081952  | -6.592676 |
| H | 1.968561  | 5.390519  | -7.634640 |
| H | 2.393551  | 5.741619  | -5.953895 |
| H | 0.734432  | 5.296292  | -6.370341 |
| C | 1.718677  | 0.045864  | -5.634882 |
| H | 0.843830  | -0.266999 | -6.221705 |
| H | 1.464315  | -0.116836 | -4.576554 |
| H | 2.558492  | -0.617411 | -5.872769 |
| C | -0.243043 | 2.570475  | -6.191767 |
| C | -0.931020 | 3.287148  | -7.188521 |
| H | -0.359991 | 3.841087  | -7.938423 |
| C | -2.321645 | 3.267757  | -7.261540 |

|   |           |          |           |
|---|-----------|----------|-----------|
| H | -2.830714 | 3.828460 | -8.048811 |
| C | -3.062701 | 2.518085 | -6.353669 |
| H | -4.151393 | 2.477370 | -6.404037 |
| C | -2.399298 | 1.795995 | -5.354438 |
| C | -1.003910 | 1.830255 | -5.274629 |
| H | -0.515258 | 1.271797 | -4.474501 |
| C | -3.183987 | 0.985024 | -4.373763 |
| C | 8.631867  | 3.874158 | -0.369863 |
| H | 9.552909  | 4.362048 | -0.042794 |
| O | 4.426461  | 1.871427 | 4.423814  |
| C | 3.519862  | 2.474416 | 3.779591  |
| O | 3.080073  | 2.160424 | 2.638631  |
| C | 2.914852  | 3.660684 | 4.458487  |
| O | -4.297701 | 1.472341 | -1.507478 |
| C | 3.412641  | 4.072679 | 5.700943  |
| H | 4.250429  | 3.532095 | 6.142027  |
| O | -6.263764 | 1.019029 | -2.511610 |
| C | 1.754794  | 5.824025 | 5.768228  |
| H | 1.316633  | 6.685707 | 6.277022  |
| C | 1.237539  | 5.430077 | 4.520279  |
| C | 1.835815  | 4.335171 | 3.877286  |
| H | 1.446775  | 3.971999 | 2.923631  |
| C | 0.103813  | 6.152468 | 3.940221  |
| C | -0.074577 | 6.549235 | 2.617066  |
| N | -1.264194 | 7.224800 | 2.593915  |
| N | -1.859384 | 7.285246 | 3.799827  |
| C | -1.046091 | 6.644416 | 4.626561  |
| C | -1.403321 | 6.494387 | 6.061945  |
| H | -2.489034 | 6.579105 | 6.189999  |
| H | -0.943588 | 7.273502 | 6.689298  |
| H | -1.075811 | 5.524980 | 6.462169  |

|   |           |          |           |
|---|-----------|----------|-----------|
| C | 0.804982  | 6.375939 | 1.435613  |
| H | 0.459827  | 5.580671 | 0.755873  |
| H | 1.816134  | 6.098243 | 1.759156  |
| H | 0.898828  | 7.296282 | 0.840571  |
| C | -1.885121 | 7.927287 | 1.496033  |
| H | -2.044699 | 8.975038 | 1.780437  |
| H | -1.203452 | 7.889896 | 0.637084  |
| N | -3.174642 | 7.412799 | 1.127212  |
| N | -4.269875 | 7.989086 | 1.659938  |
| C | -5.295252 | 7.291162 | 1.195584  |
| C | -4.856688 | 6.227159 | 0.347083  |
| C | -3.466452 | 6.338013 | 0.336872  |
| C | -2.420258 | 5.558269 | -0.365358 |
| H | -2.012058 | 4.744275 | 0.256157  |
| H | -1.571286 | 6.188517 | -0.667954 |
| H | -2.822133 | 5.094608 | -1.275244 |
| C | -6.675183 | 7.652582 | 1.616416  |
| H | -7.292481 | 6.761449 | 1.796055  |
| H | -7.199667 | 8.263485 | 0.865512  |
| H | -6.636293 | 8.241485 | 2.540562  |
| C | -5.681706 | 5.270986 | -0.392693 |
| C | -6.955049 | 5.644348 | -0.864456 |
| H | -7.316133 | 6.658200 | -0.684953 |
| C | -7.749757 | 4.759178 | -1.585946 |
| H | -8.733553 | 5.078779 | -1.937094 |
| C | -7.287217 | 3.482751 | -1.885468 |
| H | -7.884535 | 2.783284 | -2.470743 |
| C | -6.018307 | 3.091193 | -1.441338 |
| C | -5.237664 | 3.970005 | -0.683630 |
| H | -4.273252 | 3.614854 | -0.317863 |
| C | 2.826904  | 5.154405 | 6.349663  |

|    |           |           |           |
|----|-----------|-----------|-----------|
| H  | 3.212695  | 5.484063  | 7.316975  |
| Cu | -5.463562 | -0.452095 | -3.540877 |
| C  | 5.486688  | -1.749048 | 1.834018  |
| Cu | 3.577394  | 0.352189  | 1.930166  |
| O  | -6.252478 | -1.766924 | -2.289185 |
| C  | -5.853466 | -1.771669 | -1.089442 |
| O  | -4.834049 | -1.176428 | -0.639344 |
| C  | -6.675685 | -2.552220 | -0.115520 |
| O  | 2.543680  | -0.454374 | 3.425835  |
| C  | -7.858111 | -3.168834 | -0.542769 |
| H  | -8.150004 | -3.088498 | -1.590344 |
| O  | 4.429867  | -0.901553 | 4.576086  |
| C  | -8.246243 | -3.948528 | 1.709271  |
| H  | -8.858277 | -4.512519 | 2.417307  |
| C  | -7.060488 | -3.340754 | 2.160901  |
| C  | -6.285008 | -2.638914 | 1.224809  |
| H  | -5.378740 | -2.117644 | 1.539532  |
| C  | -6.673006 | -3.421958 | 3.570642  |
| C  | -5.399467 | -3.633449 | 4.095267  |
| N  | -5.552289 | -3.599367 | 5.449400  |
| N  | -6.825379 | -3.380944 | 5.835435  |
| C  | -7.519141 | -3.280711 | 4.709526  |
| C  | -8.980045 | -3.008892 | 4.748715  |
| H  | -9.254620 | -2.557069 | 5.709467  |
| H  | -9.286186 | -2.328596 | 3.941819  |
| H  | -9.579029 | -3.926219 | 4.639232  |
| C  | -4.100503 | -3.882747 | 3.426848  |
| H  | -3.548812 | -4.714102 | 3.890905  |
| H  | -4.258996 | -4.138498 | 2.371692  |
| H  | -3.440111 | -3.001782 | 3.462736  |
| C  | -4.577683 | -3.842236 | 6.478938  |

|   |           |           |           |
|---|-----------|-----------|-----------|
| H | -4.341654 | -4.915095 | 6.566085  |
| H | -5.058379 | -3.525956 | 7.415873  |
| N | -3.338550 | -3.143703 | 6.262002  |
| N | -3.358286 | -1.820077 | 6.013003  |
| C | -2.083282 | -1.463587 | 5.915062  |
| C | -1.218045 | -2.576763 | 6.135680  |
| C | -2.074086 | -3.653178 | 6.352938  |
| C | -1.785165 | -5.088697 | 6.587961  |
| H | -1.966179 | -5.398885 | 7.629540  |
| H | -2.392437 | -5.747038 | 5.948495  |
| H | -0.732853 | -5.303166 | 6.364557  |
| C | -1.714773 | -0.050861 | 5.639938  |
| H | -0.840051 | 0.260517  | 6.227776  |
| H | -1.459794 | 0.113647  | 4.582057  |
| H | -2.554380 | 0.612390  | 5.878639  |
| C | 0.245857  | -2.577484 | 6.189958  |
| C | 0.934370  | -3.296507 | 7.184637  |
| H | 0.363743  | -3.851837 | 7.933821  |
| C | 2.325066  | -3.277772 | 7.256546  |
| H | 2.834600  | -3.840349 | 8.042178  |
| C | 3.065647  | -2.526374 | 6.349707  |
| H | 4.154393  | -2.486145 | 6.399335  |
| C | 2.401696  | -1.801905 | 5.352563  |
| C | 1.006235  | -1.835581 | 5.273781  |
| H | 0.517045  | -1.275246 | 4.475302  |
| C | 3.185833  | -0.988918 | 4.373136  |
| C | -8.638558 | -3.862630 | 0.376259  |
| H | -9.561303 | -4.348016 | 0.050273  |
| O | -4.431398 | -1.875669 | -4.420206 |
| C | -3.524539 | -2.477825 | -3.775583 |
| O | -3.082906 | -2.161285 | -2.636050 |

|   |           |           |           |
|---|-----------|-----------|-----------|
| C | -2.921847 | -3.666539 | -4.452308 |
| O | 4.299324  | -1.470232 | 1.506623  |
| C | -3.424185 | -4.082880 | -5.691492 |
| H | -4.263475 | -3.543717 | -6.131450 |
| O | 6.265778  | -1.015242 | 2.509206  |
| C | -1.766900 | -5.834680 | -5.758577 |
| H | -1.330763 | -6.698303 | -6.265809 |
| C | -1.244847 | -5.436185 | -4.514073 |
| C | -1.840738 | -4.339053 | -3.872643 |
| H | -1.448237 | -3.972677 | -2.921623 |
| C | -0.108717 | -6.156629 | -3.936215 |
| C | 0.074854  | -6.550040 | -2.612788 |
| N | 1.264534  | -7.225650 | -2.592595 |
| N | 1.854951  | -7.289176 | -3.800684 |
| C | 1.038488  | -6.650339 | -4.625815 |
| C | 1.390187  | -6.503835 | -6.062941 |
| H | 2.475496  | -6.587848 | -6.194848 |
| H | 0.928903  | -7.285094 | -6.686479 |
| H | 1.060268  | -5.535825 | -6.464541 |
| C | -0.799952 | -6.373523 | -1.428307 |
| H | -0.451469 | -5.577141 | -0.751589 |
| H | -1.812123 | -6.095661 | -1.748498 |
| H | -0.892266 | -7.292535 | -0.830951 |
| C | 1.889644  | -7.925511 | -1.495400 |
| H | 2.049664  | -8.973440 | -1.778866 |
| H | 1.210439  | -7.887770 | -0.634556 |
| N | 3.179482  | -7.408784 | -1.130731 |
| N | 4.273782  | -7.981638 | -1.669099 |
| C | 5.299539  | -7.282179 | -1.207923 |
| C | 4.862178  | -6.220618 | -0.355785 |
| C | 3.472254  | -6.334641 | -0.339809 |

|   |           |           |           |
|---|-----------|-----------|-----------|
| C | 2.427730  | -5.558262 | 0.368636  |
| H | 2.017341  | -4.741851 | -0.248236 |
| H | 1.579950  | -6.190006 | 0.671375  |
| H | 2.832236  | -5.097978 | 1.279099  |
| C | 6.678511  | -7.639739 | -1.635106 |
| H | 7.292901  | -6.746855 | -1.816049 |
| H | 7.207638  | -8.250449 | -0.887312 |
| H | 6.637108  | -8.227413 | -2.559922 |
| C | 5.688000  | -5.263809 | 0.382253  |
| C | 6.964304  | -5.634686 | 0.847926  |
| H | 7.327419  | -6.647160 | 0.664752  |
| C | 7.759589  | -4.748825 | 1.567960  |
| H | 8.745708  | -5.066464 | 1.914339  |
| C | 7.294837  | -3.474281 | 1.872099  |
| H | 7.892631  | -2.774406 | 2.456418  |
| C | 6.023157  | -3.085194 | 1.433797  |
| C | 5.241803  | -3.964565 | 0.677486  |
| H | 4.275061  | -3.611143 | 0.316252  |
| C | -2.841114 | -5.167090 | -6.338434 |
| H | -3.230623 | -5.500254 | -7.303051 |

224

cat1isomersenseAXIALSVP3 SCF Done: -12499.8197745 A.U.

|    |           |           |           |
|----|-----------|-----------|-----------|
| Cu | -6.092323 | -0.975328 | -2.349618 |
| C  | 5.313914  | 2.531957  | 0.672956  |
| Cu | 3.806182  | 0.241025  | 1.387202  |
| O  | -6.763265 | 0.604492  | -1.365593 |
| C  | -6.146462 | 1.002914  | -0.337042 |
| O  | -5.041687 | 0.565477  | 0.092316  |
| C  | -6.774018 | 2.130054  | 0.415965  |
| O  | 2.978299  | 1.191746  | 2.946000  |
| C  | -8.088437 | 2.518030  | 0.132621  |

|   |           |          |           |
|---|-----------|----------|-----------|
| H | -8.657069 | 1.967077 | -0.617335 |
| O | 4.998394  | 1.798217 | 3.751182  |
| C | -7.879150 | 4.317950 | 1.731093  |
| H | -8.310902 | 5.197263 | 2.213493  |
| C | -6.552065 | 3.952088 | 2.024647  |
| C | -6.026641 | 2.827011 | 1.369399  |
| H | -5.020948 | 2.470642 | 1.597496  |
| C | -5.743981 | 4.735847 | 2.959015  |
| C | -4.381359 | 5.014122 | 2.864728  |
| N | -4.092400 | 5.816419 | 3.930051  |
| N | -5.163361 | 6.064102 | 4.710256  |
| C | -6.171622 | 5.425327 | 4.134501  |
| C | -7.525261 | 5.469010 | 4.747770  |
| H | -7.446087 | 5.733185 | 5.808962  |
| H | -8.038898 | 4.501115 | 4.665542  |
| H | -8.175829 | 6.220701 | 4.274590  |
| C | -3.364463 | 4.631883 | 1.857208  |
| H | -2.663976 | 5.455441 | 1.649733  |
| H | -3.842120 | 4.359345 | 0.907363  |
| H | -2.759215 | 3.766798 | 2.174814  |
| C | -2.824475 | 6.384775 | 4.294977  |
| H | -2.314528 | 6.772174 | 3.403221  |
| H | -3.052022 | 7.222089 | 4.966609  |
| N | -1.926351 | 5.469893 | 4.957921  |
| N | -2.263171 | 5.028086 | 6.185296  |
| C | -1.212339 | 4.343643 | 6.614201  |
| C | -0.168800 | 4.338022 | 5.642227  |
| C | -0.670091 | 5.081153 | 4.577089  |
| C | -0.030111 | 5.460599 | 3.294164  |
| H | -0.192284 | 6.516952 | 3.033131  |
| H | -0.384306 | 4.854275 | 2.445036  |



|   |           |          |           |
|---|-----------|----------|-----------|
| H | 1.054923  | 5.307983 | 3.360339  |
| C | -1.231000 | 3.688199 | 7.948295  |
| H | -0.774262 | 4.318963 | 8.726324  |
| H | -0.679519 | 2.738198 | 7.940247  |
| H | -2.263968 | 3.492772 | 8.259689  |
| C | 1.171834  | 3.761374 | 5.772649  |
| C | 1.899509  | 3.949503 | 6.962083  |
| H | 1.443649  | 4.513564 | 7.779451  |
| C | 3.197057  | 3.466141 | 7.097406  |
| H | 3.745623  | 3.635467 | 8.026678  |
| C | 3.806334  | 2.790951 | 6.044497  |
| H | 4.830347  | 2.423853 | 6.122756  |
| C | 3.088323  | 2.560835 | 4.865543  |
| C | 1.778555  | 3.033521 | 4.736887  |
| H | 1.228990  | 2.817082 | 3.817692  |
| C | 3.734082  | 1.788332 | 3.759961  |
| C | -8.638390 | 3.602334 | 0.809101  |
| H | -9.664309 | 3.912181 | 0.597555  |
| O | -5.323591 | 0.214845 | -3.733145 |
| C | -4.397161 | 1.015410 | -3.419278 |
| O | -3.759806 | 1.028615 | -2.328392 |
| C | -4.021747 | 2.036039 | -4.443869 |
| O | 4.158462  | 2.034301 | 0.571668  |
| C | -4.688403 | 2.065971 | -5.674506 |
| H | -5.486558 | 1.347282 | -5.863098 |
| O | 6.292950  | 2.031448 | 1.298610  |
| C | -3.296215 | 3.913984 | -6.364961 |
| H | -3.033141 | 4.663483 | -7.114783 |
| C | -2.615019 | 3.906428 | -5.133551 |
| C | -2.991672 | 2.945580 | -4.183007 |
| H | -2.466770 | 2.875865 | -3.228238 |

|   |           |          |           |
|---|-----------|----------|-----------|
| C | -1.549701 | 4.875892 | -4.871489 |
| C | -1.307188 | 5.578564 | -3.692998 |
| N | -0.229409 | 6.378824 | -3.957539 |
| N | 0.234869  | 6.238667 | -5.213203 |
| C | -0.551335 | 5.335529 | -5.781162 |
| C | -0.311019 | 4.910886 | -7.185398 |
| H | 0.729649  | 5.112136 | -7.465836 |
| H | -0.948309 | 5.454698 | -7.899502 |
| H | -0.512790 | 3.839962 | -7.325658 |
| C | -2.034563 | 5.568994 | -2.400199 |
| H | -1.524918 | 4.971389 | -1.626975 |
| H | -3.031255 | 5.129117 | -2.532932 |
| H | -2.181111 | 6.579004 | -1.989846 |
| C | 0.374830  | 7.387032 | -3.118676 |
| H | 0.328817  | 8.359477 | -3.625268 |
| H | -0.200950 | 7.442816 | -2.186029 |
| N | 1.762322  | 7.153656 | -2.831475 |
| N | 2.687897  | 7.776027 | -3.587314 |
| C | 3.856697  | 7.345989 | -3.136297 |
| C | 3.688225  | 6.411398 | -2.067371 |
| C | 2.307102  | 6.309358 | -1.906626 |
| C | 1.479178  | 5.530494 | -0.955872 |
| H | 1.126646  | 4.578229 | -1.385543 |
| H | 0.586153  | 6.089067 | -0.636655 |
| H | 2.051563  | 5.283021 | -0.052616 |
| C | 5.110587  | 7.824431 | -3.776888 |
| H | 5.854307  | 7.020442 | -3.865384 |
| H | 5.585382  | 8.643571 | -3.215107 |
| H | 4.889972  | 8.207324 | -4.780375 |
| C | 4.732853  | 5.747159 | -1.285711 |
| C | 5.954552  | 6.399516 | -1.030949 |

|    |           |           |           |
|----|-----------|-----------|-----------|
| H  | 6.107750  | 7.412890  | -1.405926 |
| C  | 6.958550  | 5.791843  | -0.283637 |
| H  | 7.895761  | 6.323293  | -0.103530 |
| C  | 6.765590  | 4.524025  | 0.254128  |
| H  | 7.532762  | 4.039714  | 0.858685  |
| C  | 5.553372  | 3.860529  | 0.030136  |
| C  | 4.558555  | 4.460624  | -0.748723 |
| H  | 3.644741  | 3.895983  | -0.940157 |
| C  | -4.315946 | 3.004839  | -6.631224 |
| H  | -4.832031 | 3.036145  | -7.593444 |
| Cu | 5.978025  | 0.557617  | 2.565028  |
| C  | -5.634263 | -2.642659 | -0.171632 |
| Cu | -3.967193 | -0.558467 | -1.133985 |
| O  | 6.717995  | -0.733398 | 1.278327  |
| C  | 6.072811  | -0.996732 | 0.222603  |
| O  | 4.886184  | -0.651820 | -0.033693 |
| C  | 6.806992  | -1.790868 | -0.810647 |
| O  | -3.129804 | -1.664701 | -2.556751 |
| C  | 8.161487  | -2.087433 | -0.612719 |
| H  | 8.650498  | -1.748075 | 0.300696  |
| O  | -5.125686 | -2.502559 | -3.186269 |
| C  | 8.208793  | -3.225301 | -2.739714 |
| H  | 8.758501  | -3.805818 | -3.484304 |
| C  | 6.847529  | -2.945179 | -2.959107 |
| C  | 6.159921  | -2.214225 | -1.976626 |
| H  | 5.113386  | -1.938961 | -2.123633 |
| C  | 6.194311  | -3.399716 | -4.188267 |
| C  | 4.923258  | -3.952845 | -4.327496 |
| N  | 4.783466  | -4.217912 | -5.657242 |
| N  | 5.863549  | -3.871267 | -6.385192 |
| C  | 6.731653  | -3.383072 | -5.509651 |

|   |           |           |           |
|---|-----------|-----------|-----------|
| C | 8.049815  | -2.870190 | -5.967497 |
| H | 8.003091  | -2.606045 | -7.030795 |
| H | 8.357136  | -1.981228 | -5.399426 |
| H | 8.851588  | -3.616291 | -5.854833 |
| C | 3.875853  | -4.260953 | -3.325836 |
| H | 3.425009  | -5.251248 | -3.490335 |
| H | 4.300913  | -4.254320 | -2.314242 |
| H | 3.053295  | -3.528257 | -3.346961 |
| C | 3.693067  | -4.861540 | -6.336609 |
| H | 3.648358  | -5.936948 | -6.100778 |
| H | 3.915403  | -4.758540 | -7.408328 |
| N | 2.411813  | -4.292471 | -6.008614 |
| N | 2.242048  | -2.959345 | -6.092012 |
| C | 0.968446  | -2.748778 | -5.783894 |
| C | 0.291223  | -3.977966 | -5.523592 |
| C | 1.267001  | -4.959468 | -5.675809 |
| C | 1.199544  | -6.429268 | -5.490366 |
| H | 1.228216  | -6.984578 | -6.441467 |
| H | 2.026630  | -6.810825 | -4.872696 |
| H | 0.265843  | -6.702994 | -4.983831 |
| C | 0.414779  | -1.369988 | -5.775899 |
| H | -0.597744 | -1.337763 | -6.201758 |
| H | 0.344235  | -0.955908 | -4.758747 |
| H | 1.061910  | -0.700458 | -6.354526 |
| C | -1.129486 | -4.166768 | -5.222937 |
| C | -1.872919 | -5.202406 | -5.818758 |
| H | -1.379956 | -5.876857 | -6.524074 |
| C | -3.233388 | -5.353970 | -5.560521 |
| H | -3.789189 | -6.162139 | -6.041475 |
| C | -3.893458 | -4.464381 | -4.718271 |
| H | -4.962774 | -4.553506 | -4.522442 |

|   |           |           |           |
|---|-----------|-----------|-----------|
| C | -3.171831 | -3.429693 | -4.111498 |
| C | -1.802855 | -3.292732 | -4.357087 |
| H | -1.263141 | -2.487763 | -3.856026 |
| C | -3.863563 | -2.457700 | -3.211671 |
| C | 8.856444  | -2.800136 | -1.583769 |
| H | 9.912775  | -3.035597 | -1.435436 |
| O | 5.420053  | -0.913604 | 3.743599  |
| C | 4.447358  | -1.649205 | 3.407676  |
| O | 3.692749  | -1.481129 | 2.410194  |
| C | 4.178080  | -2.813960 | 4.306624  |
| O | -4.441286 | -2.225360 | -0.152385 |
| C | 5.044657  | -3.064364 | 5.378147  |
| H | 5.913304  | -2.420707 | 5.517917  |
| O | -6.583827 | -2.154761 | -0.849214 |
| C | 3.657934  | -4.918591 | 6.049772  |
| H | 3.467379  | -5.755576 | 6.725472  |
| C | 2.771834  | -4.687953 | 4.981385  |
| C | 3.052531  | -3.622309 | 4.111482  |
| H | 2.375770  | -3.385733 | 3.287301  |
| C | 1.595936  | -5.547362 | 4.824514  |
| C | 1.097535  | -6.124634 | 3.659672  |
| N | 0.027997  | -6.882568 | 4.053880  |
| N | -0.195782 | -6.827034 | 5.380405  |
| C | 0.742883  | -6.026397 | 5.862938  |
| C | 0.789130  | -5.716238 | 7.316360  |
| H | -0.203802 | -5.851421 | 7.761525  |
| H | 1.478950  | -6.378287 | 7.862001  |
| H | 1.120491  | -4.685079 | 7.500499  |
| C | 1.589734  | -6.041454 | 2.263394  |
| H | 0.977705  | -5.379603 | 1.630678  |
| H | 2.609542  | -5.636249 | 2.251188  |

|   |           |           |          |
|---|-----------|-----------|----------|
| H | 1.626686  | -7.023450 | 1.768677 |
| C | -0.789626 | -7.775186 | 3.267725 |
| H | -0.777128 | -8.769334 | 3.731594 |
| H | -0.354651 | -7.843972 | 2.263276 |
| N | -2.171669 | -7.389672 | 3.178358 |
| N | -3.031290 | -7.880493 | 4.092763 |
| C | -4.204092 | -7.339317 | 3.799805 |
| C | -4.105306 | -6.467722 | 2.671302 |
| C | -2.761185 | -6.524344 | 2.301293 |
| C | -2.018771 | -5.875317 | 1.194929 |
| H | -1.573546 | -4.911918 | 1.492989 |
| H | -1.199887 | -6.506140 | 0.820491 |
| H | -2.683416 | -5.668357 | 0.346244 |
| C | -5.386864 | -7.656411 | 4.643645 |
| H | -6.016924 | -6.771794 | 4.810739 |
| H | -6.028740 | -8.430935 | 4.196148 |
| H | -5.054357 | -8.036411 | 5.616934 |
| C | -5.177955 | -5.726909 | 2.006621 |
| C | -6.494101 | -6.227571 | 1.985676 |
| H | -6.712900 | -7.179976 | 2.471216 |
| C | -7.516363 | -5.551733 | 1.325825 |
| H | -8.526909 | -5.966554 | 1.327783 |
| C | -7.252492 | -4.372236 | 0.637880 |
| H | -8.033457 | -3.846802 | 0.087588 |
| C | -5.950935 | -3.856850 | 0.638609 |
| C | -4.935699 | -4.514913 | 1.339179 |
| H | -3.945193 | -4.059156 | 1.352861 |
| C | 4.779367  | -4.118937 | 6.244409 |
| H | 5.454436  | -4.323131 | 7.078531 |

224

cat1isomersenseAXIALSVP4 SCF Done: -12499.8141622 A.U.

|    |           |           |           |
|----|-----------|-----------|-----------|
| Cu | 6.176291  | 2.097942  | -1.160157 |
| C  | -4.858974 | -3.610507 | -0.777355 |
| Cu | -3.903881 | -1.291148 | 0.528715  |
| O  | 6.864271  | 0.557133  | -0.158621 |
| C  | 6.119039  | -0.038517 | 0.672293  |
| O  | 4.888466  | 0.169309  | 0.859284  |
| C  | 6.779087  | -1.112404 | 1.475147  |
| O  | -3.223651 | -2.368379 | 2.079664  |
| C  | 8.175790  | -1.204569 | 1.490064  |
| H  | 8.763921  | -0.469333 | 0.940266  |
| O  | -5.223128 | -3.369758 | 2.388272  |
| C  | 8.012193  | -3.187220 | 2.856861  |
| H  | 8.504955  | -4.019451 | 3.363426  |
| C  | 6.606305  | -3.120702 | 2.850200  |
| C  | 6.006164  | -2.047944 | 2.169496  |
| H  | 4.922043  | -1.921568 | 2.174860  |
| C  | 5.813168  | -4.159060 | 3.508510  |
| C  | 4.603978  | -4.701805 | 3.077117  |
| N  | 4.296646  | -5.682151 | 3.976201  |
| N  | 5.208081  | -5.799106 | 4.962253  |
| C  | 6.134205  | -4.890935 | 4.692532  |
| C  | 7.300007  | -4.728609 | 5.600998  |
| H  | 7.057556  | -5.124895 | 6.594212  |
| H  | 7.588358  | -3.673636 | 5.706033  |
| H  | 8.188323  | -5.272427 | 5.244146  |
| C  | 3.758886  | -4.407254 | 1.896376  |
| H  | 3.318160  | -5.320355 | 1.467786  |
| H  | 4.349792  | -3.926019 | 1.106427  |
| H  | 2.924179  | -3.727545 | 2.134865  |
| C  | 3.152537  | -6.550921 | 3.989899  |
| H  | 2.916803  | -6.876204 | 2.968526  |

|   |           |           |           |
|---|-----------|-----------|-----------|
| H | 3.442493  | -7.426169 | 4.584530  |
| N | 1.962189  | -5.965833 | 4.558029  |
| N | 1.954578  | -5.700676 | 5.878658  |
| C | 0.718702  | -5.308207 | 6.152455  |
| C | -0.095253 | -5.315481 | 4.981515  |
| C | 0.748849  | -5.748986 | 3.962904  |
| C | 0.463425  | -6.003157 | 2.529739  |
| H | 0.900260  | -6.947008 | 2.170827  |
| H | 0.830397  | -5.200265 | 1.870198  |
| H | -0.620936 | -6.069969 | 2.372530  |
| C | 0.342009  | -4.911821 | 7.534787  |
| H | -0.108535 | -5.743999 | 8.097134  |
| H | -0.387888 | -4.090842 | 7.535897  |
| H | 1.231033  | -4.593232 | 8.091850  |
| C | -1.526092 | -5.018318 | 4.886421  |
| C | -2.413967 | -5.535156 | 5.847859  |
| H | -2.018160 | -6.147973 | 6.661236  |
| C | -3.784251 | -5.311481 | 5.757178  |
| H | -4.454389 | -5.732584 | 6.509982  |
| C | -4.305001 | -4.573461 | 4.698923  |
| H | -5.377419 | -4.402491 | 4.599054  |
| C | -3.436690 | -4.022743 | 3.749449  |
| C | -2.058855 | -4.236826 | 3.849753  |
| H | -1.399800 | -3.771485 | 3.113038  |
| C | -3.999327 | -3.185266 | 2.646604  |
| C | 8.784245  | -2.234599 | 2.199047  |
| H | 9.873569  | -2.313264 | 2.218651  |
| O | 5.924860  | 0.946653  | -2.758934 |
| C | 5.076753  | 0.010314  | -2.723722 |
| O | 4.215175  | -0.182553 | -1.819716 |
| C | 5.099510  | -0.951720 | -3.866742 |



|   |           |           |           |
|---|-----------|-----------|-----------|
| O | -3.808769 | -2.934746 | -0.588947 |
| C | 6.014355  | -0.765585 | -4.909996 |
| H | 6.706903  | 0.075376  | -4.863952 |
| O | -6.000203 | -3.373640 | -0.287374 |
| C | 5.125616  | -2.717964 | -6.016310 |
| H | 5.156662  | -3.421168 | -6.851726 |
| C | 4.201150  | -2.929450 | -4.976468 |
| C | 4.199417  | -2.021774 | -3.906460 |
| H | 3.475014  | -2.122036 | -3.095585 |
| C | 3.278436  | -4.065351 | -5.032006 |
| C | 2.918180  | -4.926091 | -3.997544 |
| N | 2.069244  | -5.840785 | -4.559150 |
| N | 1.858322  | -5.626467 | -5.871279 |
| C | 2.581839  | -4.558565 | -6.175166 |
| C | 2.571078  | -4.015262 | -7.558937 |
| H | 1.655505  | -4.324535 | -8.076905 |
| H | 3.419079  | -4.382869 | -8.156845 |
| H | 2.625526  | -2.917925 | -7.564461 |
| C | 3.351059  | -4.958151 | -2.579049 |
| H | 2.595195  | -4.546101 | -1.890763 |
| H | 4.258243  | -4.354071 | -2.449747 |
| H | 3.589838  | -5.974683 | -2.232806 |
| C | 1.492461  | -7.023917 | -3.964535 |
| H | 1.809131  | -7.907211 | -4.533799 |
| H | 1.869837  | -7.107694 | -2.937639 |
| N | 0.056332  | -7.042400 | -3.966012 |
| N | -0.575065 | -7.675959 | -4.973465 |
| C | -1.867573 | -7.498124 | -4.745494 |
| C | -2.084110 | -6.721242 | -3.564928 |
| C | -0.802655 | -6.438941 | -3.092149 |
| C | -0.332035 | -5.699881 | -1.896655 |

|    |           |           |           |
|----|-----------|-----------|-----------|
| H  | -0.089006 | -4.647750 | -2.119251 |
| H  | 0.572031  | -6.153715 | -1.463167 |
| H  | -1.101633 | -5.692633 | -1.113985 |
| C  | -2.862889 | -8.056925 | -5.698645 |
| H  | -3.702459 | -7.366941 | -5.861192 |
| H  | -3.290389 | -9.010259 | -5.351718 |
| H  | -2.380514 | -8.252174 | -6.663754 |
| C  | -3.364004 | -6.347809 | -2.960122 |
| C  | -4.480742 | -7.199337 | -3.066229 |
| H  | -4.380077 | -8.151200 | -3.590403 |
| C  | -5.702402 | -6.868129 | -2.488042 |
| H  | -6.550480 | -7.549162 | -2.589077 |
| C  | -5.841656 | -5.690160 | -1.761957 |
| H  | -6.784008 | -5.424833 | -1.281975 |
| C  | -4.742337 | -4.834079 | -1.628093 |
| C  | -3.526068 | -5.152278 | -2.240961 |
| H  | -2.705400 | -4.438858 | -2.154535 |
| C  | 6.017174  | -1.649687 | -5.983749 |
| H  | 6.728182  | -1.512082 | -6.801511 |
| Cu | -6.161353 | -2.100371 | 1.210700  |
| C  | 4.983538  | 3.465203  | 0.959002  |
| Cu | 3.925239  | 1.277540  | -0.497074 |
| O  | -6.894461 | -0.729560 | 0.014904  |
| C  | -6.127897 | -0.134984 | -0.796241 |
| O  | -4.878591 | -0.281622 | -0.895257 |
| C  | -6.787100 | 0.862448  | -1.692030 |
| O  | 3.248936  | 2.444692  | -1.983595 |
| C  | -8.180571 | 0.860416  | -1.825528 |
| H  | -8.764961 | 0.103420  | -1.301463 |
| O  | 5.221989  | 3.529130  | -2.123019 |
| C  | -8.027790 | 2.811009  | -3.240534 |

|   |           |          |           |
|---|-----------|----------|-----------|
| H | -8.528523 | 3.595695 | -3.811280 |
| C | -6.626956 | 2.839625 | -3.112931 |
| C | -6.020031 | 1.826332 | -2.351489 |
| H | -4.933841 | 1.772125 | -2.261483 |
| C | -5.842558 | 3.905792 | -3.735775 |
| C | -4.712200 | 4.537723 | -3.220212 |
| N | -4.385787 | 5.506808 | -4.124223 |
| N | -5.211910 | 5.537126 | -5.188929 |
| C | -6.103186 | 4.582035 | -4.966699 |
| C | -7.168928 | 4.318858 | -5.969684 |
| H | -6.858069 | 4.698527 | -6.950222 |
| H | -7.382450 | 3.245042 | -6.061548 |
| H | -8.118037 | 4.816422 | -5.717042 |
| C | -3.966911 | 4.350210 | -1.952850 |
| H | -3.693206 | 5.313790 | -1.495729 |
| H | -4.574853 | 3.805018 | -1.220579 |
| H | -3.034161 | 3.778610 | -2.090801 |
| C | -3.287489 | 6.432828 | -4.081638 |
| H | -3.140064 | 6.794443 | -3.054974 |
| H | -3.578952 | 7.277955 | -4.718443 |
| N | -2.033188 | 5.892526 | -4.546116 |
| N | -1.920607 | 5.566357 | -5.849908 |
| C | -0.641576 | 5.267618 | -6.029426 |
| C | 0.095126  | 5.411361 | -4.816508 |
| C | -0.842358 | 5.818138 | -3.875459 |
| C | -0.672293 | 6.187359 | -2.449209 |
| H | -0.922876 | 7.242401 | -2.254611 |
| H | -1.289918 | 5.575379 | -1.774019 |
| H | 0.373578  | 6.045015 | -2.150375 |
| C | -0.157643 | 4.789246 | -7.350419 |
| H | 0.756934  | 5.302777 | -7.675037 |

|   |           |           |           |
|---|-----------|-----------|-----------|
| H | 0.079365  | 3.714950  | -7.325936 |
| H | -0.931003 | 4.943238  | -8.111579 |
| C | 1.540820  | 5.243780  | -4.620393 |
| C | 2.439518  | 5.970340  | -5.421656 |
| H | 2.043675  | 6.650121  | -6.180756 |
| C | 3.814996  | 5.861546  | -5.238974 |
| H | 4.495196  | 6.444526  | -5.864047 |
| C | 4.325228  | 5.028302  | -4.249203 |
| H | 5.398939  | 4.937621  | -4.081589 |
| C | 3.449120  | 4.279111  | -3.454853 |
| C | 2.066860  | 4.386286  | -3.644668 |
| H | 1.401455  | 3.778158  | -3.026671 |
| C | 4.010477  | 3.341244  | -2.438127 |
| C | -8.790330 | 1.826910  | -2.618251 |
| H | -9.876885 | 1.833404  | -2.730053 |
| O | -6.029701 | -0.758804 | 2.659473  |
| C | -5.158658 | 0.156345  | 2.605254  |
| O | -4.223083 | 0.249097  | 1.763181  |
| C | -5.258754 | 1.219691  | 3.651873  |
| O | 3.903046  | 2.867964  | 0.686544  |
| C | -6.305180 | 1.170308  | 4.580786  |
| H | -7.035945 | 0.364110  | 4.512706  |
| O | 6.124502  | 3.197393  | 0.485719  |
| C | -5.443085 | 3.160067  | 5.636538  |
| H | -5.532847 | 3.931994  | 6.404210  |
| C | -4.382905 | 3.233152  | 4.713722  |
| C | -4.306282 | 2.242749  | 3.721915  |
| H | -3.482440 | 2.238602  | 3.004836  |
| C | -3.403816 | 4.318023  | 4.819797  |
| C | -2.869085 | 5.101795  | 3.799780  |
| N | -2.052256 | 6.007614  | 4.421908  |

|   |           |          |          |
|---|-----------|----------|----------|
| N | -2.021683 | 5.856121 | 5.759039 |
| C | -2.832488 | 4.841093 | 6.018148 |
| C | -3.024918 | 4.375825 | 7.417118 |
| H | -2.160551 | 4.659488 | 8.029232 |
| H | -3.913043 | 4.825239 | 7.887213 |
| H | -3.150361 | 3.285627 | 7.468748 |
| C | -3.119547 | 5.076250 | 2.337774 |
| H | -2.297561 | 4.614027 | 1.766975 |
| H | -4.022350 | 4.489404 | 2.124705 |
| H | -3.282472 | 6.081436 | 1.920220 |
| C | -1.336118 | 7.125096 | 3.853405 |
| H | -1.635145 | 8.041611 | 4.377229 |
| H | -1.616369 | 7.210198 | 2.796486 |
| N | 0.093606  | 7.038684 | 3.975403 |
| N | 0.674873  | 7.587084 | 5.060228 |
| C | 1.968216  | 7.330807 | 4.934715 |
| C | 2.236950  | 6.590943 | 3.741494 |
| C | 0.985797  | 6.415728 | 3.149338 |
| C | 0.580904  | 5.759157 | 1.883574 |
| H | 0.310931  | 4.699399 | 2.023662 |
| H | -0.286603 | 6.254190 | 1.423031 |
| H | 1.399150  | 5.784561 | 1.151873 |
| C | 2.909224  | 7.783275 | 5.993501 |
| H | 3.679327  | 7.028075 | 6.203563 |
| H | 3.433402  | 8.712750 | 5.722802 |
| H | 2.355178  | 7.982884 | 6.918351 |
| C | 3.535220  | 6.156169 | 3.223592 |
| C | 4.700967  | 6.905162 | 3.476103 |
| H | 4.631455  | 7.825284 | 4.058481 |
| C | 5.936941  | 6.515786 | 2.968075 |
| H | 6.822447  | 7.118637 | 3.181869 |

|   |           |          |          |
|---|-----------|----------|----------|
| C | 6.045534  | 5.384164 | 2.166666 |
| H | 6.999665  | 5.080165 | 1.734946 |
| C | 4.899720  | 4.628882 | 1.891959 |
| C | 3.666936  | 5.000012 | 2.437510 |
| H | 2.806166  | 4.361267 | 2.237652 |
| C | -6.389936 | 2.142850 | 5.570983 |
| H | -7.206182 | 2.113560 | 6.296262 |

224

cat1isomersenseAXIALSVP SCF Done: -12499.8243301 A.U.

|    |           |           |           |
|----|-----------|-----------|-----------|
| Cu | 5.462595  | 0.452008  | 3.542079  |
| C  | -5.483994 | 1.752846  | -1.837197 |
| Cu | -3.578068 | -0.351671 | -1.929125 |
| O  | 6.248260  | 1.771073  | 2.292475  |
| C  | 5.850205  | 1.776191  | 1.092430  |
| O  | 4.832151  | 1.179542  | 0.641033  |
| C  | 6.671747  | 2.558838  | 0.119647  |
| O  | -2.542470 | 0.452491  | -3.424951 |
| C  | 7.851980  | 3.178640  | 0.548351  |
| H  | 8.142656  | 3.099350  | 1.596350  |
| O  | -4.427910 | 0.897285  | -4.577366 |
| C  | 8.241261  | 3.958470  | -1.703492 |
| H  | 8.852889  | 4.523691  | -2.410907 |
| C  | 7.057761  | 3.347396  | -2.156578 |
| C  | 6.282746  | 2.644052  | -1.221248 |
| H  | 5.378288  | 2.120269  | -1.536993 |
| C  | 6.672120  | 3.426404  | -3.566921 |
| C  | 5.398667  | 3.633332  | -4.093588 |
| N  | 5.553420  | 3.597536  | -5.447448 |
| N  | 6.827752  | 3.382650  | -5.831423 |
| C  | 7.520275  | 3.286133  | -4.704422 |
| C  | 8.982051  | 3.018713  | -4.741239 |

|   |           |           |           |
|---|-----------|-----------|-----------|
| H | 9.259412  | 2.567036  | -5.701257 |
| H | 9.289082  | 2.339906  | -3.933424 |
| H | 9.578056  | 3.937947  | -4.631483 |
| C | 4.098177  | 3.879826  | -3.427079 |
| H | 3.544640  | 4.708946  | -3.892928 |
| H | 4.254709  | 4.137484  | -2.372096 |
| H | 3.440369  | 2.996924  | -3.462598 |
| C | 4.580004  | 3.837296  | -6.478906 |
| H | 4.343373  | 4.909795  | -6.568830 |
| H | 5.062150  | 3.519251  | -7.414505 |
| N | 3.341097  | 3.138386  | -6.261988 |
| N | 3.361360  | 1.815294  | -6.010234 |
| C | 2.086429  | 1.458296  | -5.912615 |
| C | 1.220805  | 2.570523  | -6.136248 |
| C | 2.076456  | 3.646988  | -6.354973 |
| C | 1.786994  | 5.081952  | -6.592676 |
| H | 1.968561  | 5.390519  | -7.634640 |
| H | 2.393551  | 5.741619  | -5.953895 |
| H | 0.734432  | 5.296292  | -6.370341 |
| C | 1.718677  | 0.045864  | -5.634882 |
| H | 0.843830  | -0.266999 | -6.221705 |
| H | 1.464315  | -0.116836 | -4.576554 |
| H | 2.558492  | -0.617411 | -5.872769 |
| C | -0.243043 | 2.570475  | -6.191767 |
| C | -0.931020 | 3.287148  | -7.188521 |
| H | -0.359991 | 3.841087  | -7.938423 |
| C | -2.321645 | 3.267757  | -7.261540 |
| H | -2.830714 | 3.828460  | -8.048811 |
| C | -3.062701 | 2.518085  | -6.353669 |
| H | -4.151393 | 2.477370  | -6.404037 |
| C | -2.399298 | 1.795995  | -5.354438 |

|   |           |          |           |
|---|-----------|----------|-----------|
| C | -1.003910 | 1.830255 | -5.274629 |
| H | -0.515258 | 1.271797 | -4.474501 |
| C | -3.183987 | 0.985024 | -4.373763 |
| C | 8.631867  | 3.874158 | -0.369863 |
| H | 9.552909  | 4.362048 | -0.042794 |
| O | 4.426461  | 1.871427 | 4.423814  |
| C | 3.519862  | 2.474416 | 3.779591  |
| O | 3.080073  | 2.160424 | 2.638631  |
| C | 2.914852  | 3.660684 | 4.458487  |
| O | -4.297701 | 1.472341 | -1.507478 |
| C | 3.412641  | 4.072679 | 5.700943  |
| H | 4.250429  | 3.532095 | 6.142027  |
| O | -6.263764 | 1.019029 | -2.511610 |
| C | 1.754794  | 5.824025 | 5.768228  |
| H | 1.316633  | 6.685707 | 6.277022  |
| C | 1.237539  | 5.430077 | 4.520279  |
| C | 1.835815  | 4.335171 | 3.877286  |
| H | 1.446775  | 3.971999 | 2.923631  |
| C | 0.103813  | 6.152468 | 3.940221  |
| C | -0.074577 | 6.549235 | 2.617066  |
| N | -1.264194 | 7.224800 | 2.593915  |
| N | -1.859384 | 7.285246 | 3.799827  |
| C | -1.046091 | 6.644416 | 4.626561  |
| C | -1.403321 | 6.494387 | 6.061945  |
| H | -2.489034 | 6.579105 | 6.189999  |
| H | -0.943588 | 7.273502 | 6.689298  |
| H | -1.075811 | 5.524980 | 6.462169  |
| C | 0.804982  | 6.375939 | 1.435613  |
| H | 0.459827  | 5.580671 | 0.755873  |
| H | 1.816134  | 6.098243 | 1.759156  |
| H | 0.898828  | 7.296282 | 0.840571  |



|    |           |           |           |
|----|-----------|-----------|-----------|
| C  | -1.885121 | 7.927287  | 1.496033  |
| H  | -2.044699 | 8.975038  | 1.780437  |
| H  | -1.203452 | 7.889896  | 0.637084  |
| N  | -3.174642 | 7.412799  | 1.127212  |
| N  | -4.269875 | 7.989086  | 1.659938  |
| C  | -5.295252 | 7.291162  | 1.195584  |
| C  | -4.856688 | 6.227159  | 0.347083  |
| C  | -3.466452 | 6.338013  | 0.336872  |
| C  | -2.420258 | 5.558269  | -0.365358 |
| H  | -2.012058 | 4.744275  | 0.256157  |
| H  | -1.571286 | 6.188517  | -0.667954 |
| H  | -2.822133 | 5.094608  | -1.275244 |
| C  | -6.675183 | 7.652582  | 1.616416  |
| H  | -7.292481 | 6.761449  | 1.796055  |
| H  | -7.199667 | 8.263485  | 0.865512  |
| H  | -6.636293 | 8.241485  | 2.540562  |
| C  | -5.681706 | 5.270986  | -0.392693 |
| C  | -6.955049 | 5.644348  | -0.864456 |
| H  | -7.316133 | 6.658200  | -0.684953 |
| C  | -7.749757 | 4.759178  | -1.585946 |
| H  | -8.733553 | 5.078779  | -1.937094 |
| C  | -7.287217 | 3.482751  | -1.885468 |
| H  | -7.884535 | 2.783284  | -2.470743 |
| C  | -6.018307 | 3.091193  | -1.441338 |
| C  | -5.237664 | 3.970005  | -0.683630 |
| H  | -4.273252 | 3.614854  | -0.317863 |
| C  | 2.826904  | 5.154405  | 6.349663  |
| H  | 3.212695  | 5.484063  | 7.316975  |
| Cu | -5.463562 | -0.452095 | -3.540877 |
| C  | 5.486688  | -1.749048 | 1.834018  |
| Cu | 3.577394  | 0.352189  | 1.930166  |

|   |           |           |           |
|---|-----------|-----------|-----------|
| O | -6.252478 | -1.766924 | -2.289185 |
| C | -5.853466 | -1.771669 | -1.089442 |
| O | -4.834049 | -1.176428 | -0.639344 |
| C | -6.675685 | -2.552220 | -0.115520 |
| O | 2.543680  | -0.454374 | 3.425835  |
| C | -7.858111 | -3.168834 | -0.542769 |
| H | -8.150004 | -3.088498 | -1.590344 |
| O | 4.429867  | -0.901553 | 4.576086  |
| C | -8.246243 | -3.948528 | 1.709271  |
| H | -8.858277 | -4.512519 | 2.417307  |
| C | -7.060488 | -3.340754 | 2.160901  |
| C | -6.285008 | -2.638914 | 1.224809  |
| H | -5.378740 | -2.117644 | 1.539532  |
| C | -6.673006 | -3.421958 | 3.570642  |
| C | -5.399467 | -3.633449 | 4.095267  |
| N | -5.552289 | -3.599367 | 5.449400  |
| N | -6.825379 | -3.380944 | 5.835435  |
| C | -7.519141 | -3.280711 | 4.709526  |
| C | -8.980045 | -3.008892 | 4.748715  |
| H | -9.254620 | -2.557069 | 5.709467  |
| H | -9.286186 | -2.328596 | 3.941819  |
| H | -9.579029 | -3.926219 | 4.639232  |
| C | -4.100503 | -3.882747 | 3.426848  |
| H | -3.548812 | -4.714102 | 3.890905  |
| H | -4.258996 | -4.138498 | 2.371692  |
| H | -3.440111 | -3.001782 | 3.462736  |
| C | -4.577683 | -3.842236 | 6.478938  |
| H | -4.341654 | -4.915095 | 6.566085  |
| H | -5.058379 | -3.525956 | 7.415873  |
| N | -3.338550 | -3.143703 | 6.262002  |
| N | -3.358286 | -1.820077 | 6.013003  |

|   |           |           |           |
|---|-----------|-----------|-----------|
| C | -2.083282 | -1.463587 | 5.915062  |
| C | -1.218045 | -2.576763 | 6.135680  |
| C | -2.074086 | -3.653178 | 6.352938  |
| C | -1.785165 | -5.088697 | 6.587961  |
| H | -1.966179 | -5.398885 | 7.629540  |
| H | -2.392437 | -5.747038 | 5.948495  |
| H | -0.732853 | -5.303166 | 6.364557  |
| C | -1.714773 | -0.050861 | 5.639938  |
| H | -0.840051 | 0.260517  | 6.227776  |
| H | -1.459794 | 0.113647  | 4.582057  |
| H | -2.554380 | 0.612390  | 5.878639  |
| C | 0.245857  | -2.577484 | 6.189958  |
| C | 0.934370  | -3.296507 | 7.184637  |
| H | 0.363743  | -3.851837 | 7.933821  |
| C | 2.325066  | -3.277772 | 7.256546  |
| H | 2.834600  | -3.840349 | 8.042178  |
| C | 3.065647  | -2.526374 | 6.349707  |
| H | 4.154393  | -2.486145 | 6.399335  |
| C | 2.401696  | -1.801905 | 5.352563  |
| C | 1.006235  | -1.835581 | 5.273781  |
| H | 0.517045  | -1.275246 | 4.475302  |
| C | 3.185833  | -0.988918 | 4.373136  |
| C | -8.638558 | -3.862630 | 0.376259  |
| H | -9.561303 | -4.348016 | 0.050273  |
| O | -4.431398 | -1.875669 | -4.420206 |
| C | -3.524539 | -2.477825 | -3.775583 |
| O | -3.082906 | -2.161285 | -2.636050 |
| C | -2.921847 | -3.666539 | -4.452308 |
| O | 4.299324  | -1.470232 | 1.506623  |
| C | -3.424185 | -4.082880 | -5.691492 |
| H | -4.263475 | -3.543717 | -6.131450 |

|   |           |           |           |
|---|-----------|-----------|-----------|
| O | 6.265778  | -1.015242 | 2.509206  |
| C | -1.766900 | -5.834680 | -5.758577 |
| H | -1.330763 | -6.698303 | -6.265809 |
| C | -1.244847 | -5.436185 | -4.514073 |
| C | -1.840738 | -4.339053 | -3.872643 |
| H | -1.448237 | -3.972677 | -2.921623 |
| C | -0.108717 | -6.156629 | -3.936215 |
| C | 0.074854  | -6.550040 | -2.612788 |
| N | 1.264534  | -7.225650 | -2.592595 |
| N | 1.854951  | -7.289176 | -3.800684 |
| C | 1.038488  | -6.650339 | -4.625815 |
| C | 1.390187  | -6.503835 | -6.062941 |
| H | 2.475496  | -6.587848 | -6.194848 |
| H | 0.928903  | -7.285094 | -6.686479 |
| H | 1.060268  | -5.535825 | -6.464541 |
| C | -0.799952 | -6.373523 | -1.428307 |
| H | -0.451469 | -5.577141 | -0.751589 |
| H | -1.812123 | -6.095661 | -1.748498 |
| H | -0.892266 | -7.292535 | -0.830951 |
| C | 1.889644  | -7.925511 | -1.495400 |
| H | 2.049664  | -8.973440 | -1.778866 |
| H | 1.210439  | -7.887770 | -0.634556 |
| N | 3.179482  | -7.408784 | -1.130731 |
| N | 4.273782  | -7.981638 | -1.669099 |
| C | 5.299539  | -7.282179 | -1.207923 |
| C | 4.862178  | -6.220618 | -0.355785 |
| C | 3.472254  | -6.334641 | -0.339809 |
| C | 2.427730  | -5.558262 | 0.368636  |
| H | 2.017341  | -4.741851 | -0.248236 |
| H | 1.579950  | -6.190006 | 0.671375  |
| H | 2.832236  | -5.097978 | 1.279099  |

|   |           |           |           |
|---|-----------|-----------|-----------|
| C | 6.678511  | -7.639739 | -1.635106 |
| H | 7.292901  | -6.746855 | -1.816049 |
| H | 7.207638  | -8.250449 | -0.887312 |
| H | 6.637108  | -8.227413 | -2.559922 |
| C | 5.688000  | -5.263809 | 0.382253  |
| C | 6.964304  | -5.634686 | 0.847926  |
| H | 7.327419  | -6.647160 | 0.664752  |
| C | 7.759589  | -4.748825 | 1.567960  |
| H | 8.745708  | -5.066464 | 1.914339  |
| C | 7.294837  | -3.474281 | 1.872099  |
| H | 7.892631  | -2.774406 | 2.456418  |
| C | 6.023157  | -3.085194 | 1.433797  |
| C | 5.241803  | -3.964565 | 0.677486  |
| H | 4.275061  | -3.611143 | 0.316252  |
| C | -2.841114 | -5.167090 | -6.338434 |
| H | -3.230623 | -5.500254 | -7.303051 |

224

cat1senseAXIAL SCF Done: -12499.8571373 A.U.

|    |           |           |           |
|----|-----------|-----------|-----------|
| Cu | -2.179469 | -5.524163 | 2.448896  |
| C  | -0.058400 | 4.066519  | -3.379925 |
| Cu | 1.515011  | 3.534418  | -1.109616 |
| O  | -3.557724 | -4.356349 | 3.216715  |
| C  | -3.460305 | -3.100861 | 3.099247  |
| O  | -2.626125 | -2.472968 | 2.391730  |
| C  | -4.447628 | -2.293948 | 3.879066  |
| O  | 0.477148  | 4.841252  | 0.006386  |
| C  | -5.096418 | -2.868064 | 4.978753  |
| H  | -4.877629 | -3.902877 | 5.244955  |
| O  | 0.683595  | 6.445000  | -1.565274 |
| C  | -6.288069 | -0.798585 | 5.333938  |
| H  | -7.034128 | -0.224152 | 5.889908  |

|   |           |           |          |
|---|-----------|-----------|----------|
| C | -5.661092 | -0.208705 | 4.221512 |
| C | -4.724810 | -0.974977 | 3.510380 |
| H | -4.189863 | -0.543478 | 2.662118 |
| C | -5.988623 | 1.158786  | 3.812999 |
| C | -6.143585 | 2.268867  | 4.636678 |
| N | -6.522990 | 3.287726  | 3.813148 |
| N | -6.590797 | 2.922209  | 2.513367 |
| C | -6.267549 | 1.635279  | 2.496676 |
| C | -6.254805 | 0.864099  | 1.227668 |
| H | -6.825703 | 1.377708  | 0.443527 |
| H | -6.670415 | -0.143928 | 1.370189 |
| H | -5.232579 | 0.731349  | 0.839394 |
| C | -5.906805 | 2.454917  | 6.087631 |
| H | -5.237242 | 3.309459  | 6.266666 |
| H | -5.431631 | 1.561884  | 6.511099 |
| H | -6.836898 | 2.630155  | 6.651435 |
| C | -6.583642 | 4.689199  | 4.132497 |
| H | -7.410122 | 5.142905  | 3.571792 |
| H | -6.775284 | 4.803336  | 5.206291 |
| N | -5.362487 | 5.372178  | 3.804374 |
| N | -4.284910 | 5.167831  | 4.595278 |
| C | -3.254775 | 5.647936  | 3.910777 |
| C | -3.674949 | 6.172379  | 2.653071 |
| C | -5.046254 | 5.956521  | 2.611781 |
| C | -6.042851 | 6.205440  | 1.543804 |
| H | -6.776512 | 6.978312  | 1.822569 |
| H | -6.597650 | 5.286697  | 1.300634 |
| H | -5.539943 | 6.547619  | 0.630855 |
| C | -1.880693 | 5.625645  | 4.474998 |
| H | -1.353487 | 6.573100  | 4.295812 |
| H | -1.265149 | 4.832477  | 4.024669 |

|   |           |           |           |
|---|-----------|-----------|-----------|
| H | -1.913361 | 5.441750  | 5.555233  |
| C | -2.855271 | 6.795775  | 1.610000  |
| C | -3.206997 | 8.038826  | 1.056851  |
| H | -4.084982 | 8.562719  | 1.445352  |
| C | -2.448214 | 8.612463  | 0.038593  |
| H | -2.736138 | 9.582431  | -0.373355 |
| C | -1.330589 | 7.951553  | -0.459422 |
| H | -0.737726 | 8.373257  | -1.271742 |
| C | -0.966084 | 6.709218  | 0.075870  |
| C | -1.716280 | 6.147499  | 1.112379  |
| H | -1.427455 | 5.167572  | 1.497822  |
| C | 0.163741  | 5.940396  | -0.528770 |
| C | -6.002385 | -2.108165 | 5.711649  |
| H | -6.508972 | -2.547128 | 6.574269  |
| O | -3.397622 | -5.968694 | 0.909324  |
| C | -3.685825 | -5.028561 | 0.120653  |
| O | -3.142482 | -3.885770 | 0.085035  |
| C | -4.780518 | -5.252518 | -0.871893 |
| O | -0.057690 | 3.442297  | -2.279242 |
| C | -5.339769 | -6.521022 | -1.060957 |
| H | -4.975824 | -7.359614 | -0.465261 |
| O | 0.844146  | 4.841447  | -3.799431 |
| C | -6.807883 | -5.599472 | -2.752919 |
| H | -7.616745 | -5.743324 | -3.473776 |
| C | -6.274197 | -4.312712 | -2.560773 |
| C | -5.240864 | -4.169295 | -1.624446 |
| H | -4.763555 | -3.199475 | -1.479875 |
| C | -6.759070 | -3.141668 | -3.294074 |
| C | -6.929314 | -1.859387 | -2.774904 |
| N | -7.356074 | -1.091502 | -3.816733 |
| N | -7.465475 | -1.783770 | -4.973506 |

|   |           |           |           |
|---|-----------|-----------|-----------|
| C | -7.119307 | -3.029554 | -4.667886 |
| C | -7.117076 | -4.090366 | -5.708548 |
| H | -7.081805 | -3.644302 | -6.709676 |
| H | -8.021842 | -4.716028 | -5.663929 |
| H | -6.256833 | -4.764884 | -5.594765 |
| C | -6.756024 | -1.326090 | -1.405219 |
| H | -5.783992 | -0.826859 | -1.270832 |
| H | -6.819071 | -2.135452 | -0.666296 |
| H | -7.516433 | -0.571965 | -1.159314 |
| C | -7.684339 | 0.313210  | -3.800462 |
| H | -8.185629 | 0.515822  | -4.755235 |
| H | -8.377057 | 0.539252  | -2.978870 |
| N | -6.554885 | 1.189806  | -3.624441 |
| N | -6.321401 | 1.734356  | -2.408879 |
| C | -5.211391 | 2.449340  | -2.553090 |
| C | -4.722852 | 2.375157  | -3.893980 |
| C | -5.623734 | 1.543805  | -4.556045 |
| C | -5.675544 | 1.053909  | -5.954491 |
| H | -6.311147 | 1.688699  | -6.593474 |
| H | -6.077696 | 0.032533  | -6.016002 |
| H | -4.672223 | 1.054397  | -6.399378 |
| C | -4.661477 | 3.223733  | -1.407407 |
| H | -4.288398 | 4.207961  | -1.726244 |
| H | -3.815341 | 2.711663  | -0.923217 |
| H | -5.430241 | 3.373559  | -0.638486 |
| C | -3.554781 | 3.050240  | -4.464582 |
| C | -3.573333 | 3.580043  | -5.768384 |
| H | -4.484988 | 3.501672  | -6.366028 |
| C | -2.463926 | 4.237609  | -6.296002 |
| H | -2.508611 | 4.644301  | -7.308972 |
| C | -1.311393 | 4.402924  | -5.533357 |



|    |           |           |           |
|----|-----------|-----------|-----------|
| H  | -0.441723 | 4.934720  | -5.922040 |
| C  | -1.269622 | 3.880203  | -4.236047 |
| C  | -2.378232 | 3.204612  | -3.716899 |
| H  | -2.306602 | 2.790707  | -2.710631 |
| C  | -6.341846 | -6.686302 | -2.014349 |
| H  | -6.778526 | -7.674589 | -2.175773 |
| Cu | 2.178991  | 5.524357  | -2.448645 |
| C  | 0.057722  | -4.066740 | 3.380312  |
| Cu | -1.515521 | -3.534409 | 1.109584  |
| O  | 3.557003  | 4.356500  | -3.216816 |
| C  | 3.459434  | 3.101000  | -3.099622 |
| O  | 2.625241  | 2.473050  | -2.392172 |
| C  | 4.446591  | 2.294154  | -3.879728 |
| O  | -0.476807 | -4.840684 | -0.006357 |
| C  | 5.094991  | 2.868329  | -4.979613 |
| H  | 4.876002  | 3.903111  | -5.245772 |
| O  | -0.683404 | -6.443966 | 1.565751  |
| C  | 6.286837  | 0.799010  | -5.335055 |
| H  | 7.032860  | 0.224682  | -5.891180 |
| C  | 5.660259  | 0.209076  | -4.222431 |
| C  | 4.724039  | 0.975229  | -3.511086 |
| H  | 4.189373  | 0.543698  | -2.662660 |
| C  | 5.988243  | -1.158311 | -3.813913 |
| C  | 6.143354  | -2.268396 | -4.637563 |
| N  | 6.523442  | -3.287048 | -3.814071 |
| N  | 6.591469  | -2.921413 | -2.514332 |
| C  | 6.267724  | -1.634607 | -2.497644 |
| C  | 6.255089  | -0.863383 | -1.228674 |
| H  | 6.825452  | -1.377349 | -0.444373 |
| H  | 6.671341  | 0.144396  | -1.371096 |
| H  | 5.232836  | -0.730016 | -0.840688 |

|   |           |           |           |
|---|-----------|-----------|-----------|
| C | 5.906135  | -2.454674 | -6.088412 |
| H | 5.236515  | -3.309248 | -6.267086 |
| H | 5.430810  | -1.561727 | -6.511881 |
| H | 6.836051  | -2.630002 | -6.652477 |
| C | 6.584138  | -4.688570 | -4.133204 |
| H | 7.411050  | -5.142049 | -3.572952 |
| H | 6.775081  | -4.802885 | -5.207102 |
| N | 5.363286  | -5.371624 | -3.804094 |
| N | 4.285107  | -5.167285 | -4.594199 |
| C | 3.255445  | -5.647012 | -3.908734 |
| C | 3.676527  | -6.171206 | -2.651221 |
| C | 5.047915  | -5.955528 | -2.611067 |
| C | 6.045371  | -6.204265 | -1.543848 |
| H | 6.778718  | -6.977283 | -1.823038 |
| H | 6.600451  | -5.285510 | -1.301356 |
| H | 5.543211  | -6.546179 | -0.630393 |
| C | 1.880809  | -5.624337 | -4.471606 |
| H | 1.351077  | -6.569055 | -4.285672 |
| H | 1.268183  | -4.826398 | -4.025707 |
| H | 1.912620  | -5.447339 | -5.553030 |
| C | 2.857398  | -6.794170 | -1.607529 |
| C | 3.210091  | -8.036343 | -1.052996 |
| H | 4.088554  | -8.559942 | -1.440806 |
| C | 2.451559  | -8.609591 | -0.034345 |
| H | 2.740242  | -9.578875 | 0.378680  |
| C | 1.333158  | -7.949210 | 0.462639  |
| H | 0.740422  | -8.370632 | 1.275194  |
| C | 0.967655  | -6.707777 | -0.074060 |
| C | 1.717671  | -6.146416 | -1.110894 |
| H | 1.428020  | -5.167198 | -1.497523 |
| C | -0.163125 | -5.939437 | 0.529414  |

|   |           |           |           |
|---|-----------|-----------|-----------|
| C | 6.000846  | 2.108526  | -5.712749 |
| H | 6.507123  | 2.547529  | -6.575530 |
| O | 3.397338  | 5.968541  | -0.909059 |
| C | 3.685584  | 5.028187  | -0.120664 |
| O | 3.142246  | 3.885385  | -0.085353 |
| C | 4.780264  | 5.251911  | 0.871951  |
| O | 0.056834  | -3.442450 | 2.279658  |
| C | 5.339302  | 6.520432  | 1.061529  |
| H | 4.975273  | 7.359187  | 0.466113  |
| O | -0.844880 | -4.841474 | 3.800033  |
| C | 6.807357  | 5.598507  | 2.753340  |
| H | 7.616107  | 5.742232  | 3.474347  |
| C | 6.273899  | 4.311732  | 2.560669  |
| C | 5.240707  | 4.168486  | 1.624154  |
| H | 4.763553  | 3.198647  | 1.479198  |
| C | 6.758812  | 3.140508  | 3.293656  |
| C | 6.929404  | 1.858452  | 2.774061  |
| N | 7.356055  | 1.090252  | 3.815700  |
| N | 7.465024  | 1.782111  | 4.972766  |
| C | 7.118727  | 3.027950  | 4.667519  |
| C | 7.116077  | 4.088380  | 5.708567  |
| H | 7.080610  | 3.641945  | 6.709524  |
| H | 8.020764  | 4.714188  | 5.664407  |
| H | 6.255768  | 4.762818  | 5.594802  |
| C | 6.756576  | 1.325688  | 1.404115  |
| H | 5.784658  | 0.826368  | 1.269247  |
| H | 6.819736  | 2.135354  | 0.665531  |
| H | 7.517165  | 0.571771  | 1.158130  |
| C | 7.684235  | -0.314478 | 3.799078  |
| H | 8.185752  | -0.517324 | 4.753674  |
| H | 8.376728  | -0.540356 | 2.977257  |

|   |          |           |          |
|---|----------|-----------|----------|
| N | 6.554696 | -1.190989 | 3.623210 |
| N | 6.320386 | -1.734637 | 2.407407 |
| C | 5.210325 | -2.449507 | 2.551756 |
| C | 4.722583 | -2.376162 | 3.893000 |
| C | 5.623988 | -1.545405 | 4.555098 |
| C | 5.676623 | -1.056300 | 5.953794 |
| H | 6.312493 | -1.691512 | 6.592091 |
| H | 6.078911 | -0.034993 | 6.015613 |
| H | 4.673544 | -1.056890 | 6.399223 |
| C | 4.659578 | -3.222855 | 1.405763 |
| H | 4.286056 | -4.207134 | 1.723950 |
| H | 3.813513 | -2.709960 | 0.922329 |
| H | 5.427949 | -3.372486 | 0.636404 |
| C | 3.554717 | -3.051388 | 4.463826 |
| C | 3.573771 | -3.581750 | 5.767395 |
| H | 4.485718 | -3.503843 | 6.364654 |
| C | 2.464484 | -4.239314 | 6.295264 |
| H | 2.509567 | -4.646419 | 7.308051 |
| C | 1.311554 | -4.404089 | 5.533101 |
| H | 0.441961 | -4.935867 | 5.921983 |
| C | 1.269302 | -3.880861 | 4.236013 |
| C | 2.377796 | -3.205267 | 3.716620 |
| H | 2.305752 | -2.790945 | 2.710562 |
| C | 6.341246 | 6.685525  | 2.015093 |
| H | 6.777746 | 7.673824  | 2.176928 |

240

cat1 SCF Done: -12957.5513373 A.U.

|    |           |           |           |
|----|-----------|-----------|-----------|
| Cu | 1.801887  | -5.767419 | -1.749694 |
| C  | 0.299668  | 4.226067  | 2.962799  |
| Cu | -1.231621 | 3.517136  | 0.695889  |
| O  | 3.291341  | -4.777563 | -2.588691 |

|   |           |           |           |
|---|-----------|-----------|-----------|
| C | 3.281359  | -3.513143 | -2.626676 |
| O | 2.476096  | -2.748736 | -2.036141 |
| C | 4.350814  | -2.886548 | -3.467886 |
| O | -0.099975 | 4.704289  | -0.511069 |
| C | 4.988095  | -3.643504 | -4.458548 |
| H | 4.707433  | -4.689496 | -4.589072 |
| O | -0.205704 | 6.423849  | 0.939127  |
| C | 6.335708  | -1.729943 | -5.046237 |
| H | 7.134557  | -1.286937 | -5.647341 |
| C | 5.727794  | -0.957056 | -4.041111 |
| C | 4.718393  | -1.553486 | -3.269404 |
| H | 4.196357  | -0.973738 | -2.505096 |
| C | 6.154080  | 0.422808  | -3.798447 |
| C | 6.400246  | 1.409195  | -4.746731 |
| N | 6.853139  | 2.488874  | -4.046083 |
| N | 6.882192  | 2.279501  | -2.710716 |
| C | 6.461071  | 1.032238  | -2.545391 |
| C | 6.383476  | 0.419815  | -1.195028 |
| H | 6.982315  | 0.980930  | -0.466170 |
| H | 6.725454  | -0.625183 | -1.211709 |
| H | 5.350723  | 0.406124  | -0.811657 |
| C | 6.188238  | 1.433538  | -6.212977 |
| H | 5.568965  | 2.295693  | -6.502693 |
| H | 5.667937  | 0.523327  | -6.534634 |
| H | 7.132080  | 1.489421  | -6.778202 |
| C | 6.993298  | 3.838640  | -4.525263 |
| H | 7.845448  | 4.307864  | -4.018325 |
| H | 7.186115  | 3.817059  | -5.604671 |
| N | 5.810834  | 4.617111  | -4.278416 |
| N | 4.716424  | 4.362175  | -5.031793 |
| C | 3.709293  | 4.939144  | -4.389706 |

|   |           |           |           |
|---|-----------|-----------|-----------|
| C | 4.160231  | 5.576674  | -3.195805 |
| C | 5.525667  | 5.328240  | -3.147897 |
| C | 6.544246  | 5.656778  | -2.123076 |
| H | 7.299908  | 6.367998  | -2.492463 |
| H | 7.070208  | 4.750859  | -1.785852 |
| H | 6.066065  | 6.114736  | -1.248528 |
| C | 2.328110  | 4.899893  | -4.935429 |
| H | 1.821944  | 5.869232  | -4.827087 |
| H | 1.702661  | 4.158514  | -4.415846 |
| H | 2.343421  | 4.628738  | -5.997570 |
| C | 3.370804  | 6.323235  | -2.213018 |
| C | 3.782840  | 7.589826  | -1.764991 |
| H | 4.684670  | 8.037117  | -2.192466 |
| C | 3.050272  | 8.284045  | -0.804617 |
| H | 3.383726  | 9.271192  | -0.475868 |
| C | 1.897956  | 7.723776  | -0.263741 |
| H | 1.318636  | 8.246519  | 0.498390  |
| C | 1.470845  | 6.460946  | -0.694440 |
| C | 2.198366  | 5.777148  | -1.671322 |
| H | 1.857868  | 4.785307  | -1.975890 |
| C | 0.286089  | 5.809730  | -0.052338 |
| C | 5.964153  | -3.055304 | -5.256307 |
| H | 6.458413  | -3.640870 | -6.035070 |
| O | 2.867247  | -6.005733 | -0.049602 |
| C | 3.214966  | -4.999139 | 0.620082  |
| O | 2.767379  | -3.821849 | 0.498428  |
| C | 4.278904  | -5.194680 | 1.654634  |
| O | 0.306647  | 3.498759  | 1.929593  |
| C | 4.708887  | -6.478553 | 2.007520  |
| H | 4.253869  | -7.343333 | 1.522241  |
| O | -0.594727 | 5.048533  | 3.293458  |

|   |          |           |          |
|---|----------|-----------|----------|
| C | 6.291686 | -5.505574 | 3.559680 |
| H | 7.097263 | -5.638336 | 4.286145 |
| C | 5.889120 | -4.206496 | 3.203129 |
| C | 4.857422 | -4.078054 | 2.261774 |
| H | 4.478808 | -3.090914 | 1.992914 |
| C | 6.517613 | -3.011318 | 3.769359 |
| C | 6.804529 | -1.831798 | 3.085098 |
| N | 7.357935 | -0.992992 | 4.006267 |
| N | 7.439476 | -1.542842 | 5.238905 |
| C | 6.947390 | -2.770080 | 5.106397 |
| C | 6.875005 | -3.683244 | 6.276536 |
| H | 6.927196 | -3.111889 | 7.211115 |
| H | 7.706097 | -4.405101 | 6.291148 |
| H | 5.944504 | -4.267977 | 6.274286 |
| C | 6.634078 | -1.458261 | 1.662998 |
| H | 5.706876 | -0.890073 | 1.487563 |
| H | 6.598266 | -2.355143 | 1.030645 |
| H | 7.450516 | -0.814833 | 1.307613 |
| C | 7.801789 | 0.365002  | 3.807923 |
| H | 8.343408 | 0.641502  | 4.721328 |
| H | 8.486811 | 0.432433  | 2.952265 |
| N | 6.736268 | 1.298131  | 3.542928 |
| N | 6.514155 | 1.707559  | 2.273709 |
| C | 5.429719 | 2.472238  | 2.336880 |
| C | 4.945139 | 2.565550  | 3.677972 |
| C | 5.821532 | 1.785493  | 4.429302 |
| C | 5.861405 | 1.457616  | 5.874646 |
| H | 6.508737 | 2.149486  | 6.438001 |
| H | 6.241460 | 0.442121  | 6.055421 |
| H | 4.857625 | 1.530796  | 6.312582 |
| C | 4.901573 | 3.128365  | 1.109477 |

|    |           |           |           |
|----|-----------|-----------|-----------|
| H  | 4.559057  | 4.153874  | 1.310764  |
| H  | 4.037361  | 2.592718  | 0.685294  |
| H  | 5.672164  | 3.163636  | 0.328561  |
| C  | 3.787220  | 3.314945  | 4.169070  |
| C  | 3.800870  | 3.968099  | 5.415559  |
| H  | 4.708094  | 3.945108  | 6.024348  |
| C  | 2.688093  | 4.672620  | 5.870773  |
| H  | 2.725713  | 5.171299  | 6.842238  |
| C  | 1.539057  | 4.760827  | 5.089599  |
| H  | 0.662416  | 5.317143  | 5.426526  |
| C  | 1.504075  | 4.120609  | 3.845669  |
| C  | 2.616991  | 3.402561  | 3.401573  |
| H  | 2.550482  | 2.900078  | 2.436351  |
| C  | 5.702273  | -6.624041 | 2.972732  |
| H  | 6.037169  | -7.623433 | 3.260282  |
| O  | 2.312559  | -7.529660 | -3.055048 |
| O  | -0.908017 | 1.418972  | -0.046353 |
| Cu | -1.843706 | 5.736805  | 1.808000  |
| C  | -0.308190 | -4.307036 | -2.959689 |
| Cu | 1.189705  | -3.543101 | -0.653996 |
| O  | -3.338452 | 4.754449  | 2.606976  |
| C  | -3.314391 | 3.492769  | 2.664901  |
| O  | -2.493227 | 2.725813  | 2.096228  |
| C  | -4.390745 | 2.867840  | 3.496935  |
| O  | 0.048454  | -4.714205 | 0.551397  |
| C  | -5.033343 | 3.626802  | 4.482339  |
| H  | -4.743768 | 4.669299  | 4.620471  |
| O  | 0.183605  | -6.450518 | -0.879328 |
| C  | -6.399445 | 1.717003  | 5.045676  |
| H  | -7.209306 | 1.277326  | 5.634457  |
| C  | -5.782273 | 0.943061  | 4.046938  |



|   |           |           |          |
|---|-----------|-----------|----------|
| C | -4.760085 | 1.536779  | 3.290767 |
| H | -4.230802 | 0.955155  | 2.533124 |
| C | -6.209853 | -0.433648 | 3.790511 |
| C | -6.483796 | -1.423008 | 4.728067 |
| N | -6.923698 | -2.497841 | 4.011758 |
| N | -6.917751 | -2.283277 | 2.677019 |
| C | -6.486434 | -1.037468 | 2.527567 |
| C | -6.368335 | -0.421906 | 1.181285 |
| H | -6.958113 | -0.971787 | 0.436572 |
| H | -6.695396 | 0.627944  | 1.194079 |
| H | -5.326593 | -0.422089 | 0.821311 |
| C | -6.307104 | -1.454925 | 6.198835 |
| H | -5.700810 | -2.322602 | 6.499391 |
| H | -5.788057 | -0.549825 | 6.536512 |
| H | -7.264367 | -1.506211 | 6.741502 |
| C | -7.081242 | -3.849101 | 4.481797 |
| H | -7.925797 | -4.311293 | 3.955995 |
| H | -7.295724 | -3.830713 | 5.557169 |
| N | -5.898835 | -4.633249 | 4.254698 |
| N | -4.816822 | -4.385996 | 5.028289 |
| C | -3.801275 | -4.965556 | 4.401733 |
| C | -4.233497 | -5.596293 | 3.197513 |
| C | -5.596455 | -5.340964 | 3.126228 |
| C | -6.597611 | -5.660989 | 2.081772 |
| H | -7.364723 | -6.367950 | 2.435418 |
| H | -7.111354 | -4.751191 | 1.736218 |
| H | -6.105565 | -6.120702 | 1.215877 |
| C | -2.429663 | -4.935353 | 4.971678 |
| H | -1.928219 | -5.908071 | 4.871731 |
| H | -1.790332 | -4.198294 | 4.462921 |
| H | -2.461734 | -4.664133 | 6.033450 |

|   |           |           |           |
|---|-----------|-----------|-----------|
| C | -3.430930 | -6.342314 | 2.224507  |
| C | -3.838576 | -7.607530 | 1.768667  |
| H | -4.746038 | -8.054622 | 2.184505  |
| C | -3.096664 | -8.299264 | 0.813657  |
| H | -3.428292 | -9.284220 | 0.476629  |
| C | -1.938176 | -7.738965 | 0.285935  |
| H | -1.353123 | -8.255096 | -0.476029 |
| C | -1.515380 | -6.478256 | 0.726886  |
| C | -2.252182 | -5.795591 | 1.697715  |
| H | -1.914794 | -4.804601 | 2.008556  |
| C | -0.323463 | -5.827548 | 0.096898  |
| C | -6.022214 | 3.039452  | 5.265307  |
| H | -6.522240 | 3.624854  | 6.040504  |
| O | -2.898125 | 6.021905  | 0.106376  |
| C | -3.258062 | 5.013910  | -0.554279 |
| O | -2.826348 | 3.831707  | -0.417705 |
| C | -4.312080 | 5.210045  | -1.598376 |
| O | -0.319193 | -3.585375 | -1.922339 |
| C | -4.743907 | 6.493555  | -1.950393 |
| H | -4.300169 | 7.358087  | -1.454373 |
| O | 0.585090  | -5.132298 | -3.285784 |
| C | -6.299877 | 5.520623  | -3.529666 |
| H | -7.095593 | 5.653115  | -4.266992 |
| C | -5.895053 | 4.221756  | -3.174883 |
| C | -4.876942 | 4.093741  | -2.219028 |
| H | -4.497810 | 3.106877  | -1.950033 |
| C | -6.506505 | 3.025687  | -3.757616 |
| C | -6.797142 | 1.840841  | -3.084158 |
| N | -7.327615 | 1.002615  | -4.018980 |
| N | -7.390595 | 1.557659  | -5.250385 |
| C | -6.909900 | 2.787739  | -5.103303 |

|   |           |           |           |
|---|-----------|-----------|-----------|
| C | -6.823178 | 3.707493  | -6.267299 |
| H | -6.855495 | 3.140827  | -7.205628 |
| H | -7.658521 | 4.424150  | -6.292455 |
| H | -5.896676 | 4.298241  | -6.245823 |
| C | -6.648727 | 1.461773  | -1.661116 |
| H | -5.725904 | 0.890151  | -1.474637 |
| H | -6.620691 | 2.356154  | -1.024855 |
| H | -7.471398 | 0.818597  | -1.319870 |
| C | -7.767724 | -0.358708 | -3.834042 |
| H | -8.299511 | -0.631289 | -4.754302 |
| H | -8.460965 | -0.433006 | -2.985679 |
| N | -6.702684 | -1.290845 | -3.565507 |
| N | -6.484444 | -1.700880 | -2.295754 |
| C | -5.405407 | -2.473451 | -2.357514 |
| C | -4.920267 | -2.570866 | -3.698276 |
| C | -5.790496 | -1.785397 | -4.450773 |
| C | -5.827370 | -1.458243 | -5.896382 |
| H | -6.484072 | -2.141888 | -6.458988 |
| H | -6.194273 | -0.437840 | -6.077186 |
| H | -4.824907 | -1.544766 | -6.334872 |
| C | -4.884213 | -3.134893 | -1.129888 |
| H | -4.552879 | -4.164168 | -1.330797 |
| H | -4.013526 | -2.609596 | -0.706303 |
| H | -5.654733 | -3.161938 | -0.348546 |
| C | -3.771089 | -3.335451 | -4.186853 |
| C | -3.792931 | -3.994543 | -5.429977 |
| H | -4.698104 | -3.959539 | -6.041318 |
| C | -2.692648 | -4.723820 | -5.876409 |
| H | -2.737985 | -5.231156 | -6.843025 |
| C | -1.549238 | -4.831157 | -5.089606 |
| H | -0.688318 | -5.417246 | -5.415038 |

|   |           |           |           |
|---|-----------|-----------|-----------|
| C | -1.504550 | -4.182315 | -3.850911 |
| C | -2.604478 | -3.438789 | -3.416162 |
| H | -2.531643 | -2.931526 | -2.454085 |
| C | -5.725281 | 6.638963  | -2.927841 |
| H | -6.062354 | 7.638068  | -3.213847 |
| O | -1.925588 | 7.658503  | 2.980630  |
| O | 0.762891  | -1.469613 | 0.094089  |
| C | 2.496932  | -7.268815 | -4.216592 |
| H | 2.730885  | -8.070847 | -4.957131 |
| H | 2.442541  | -6.225966 | -4.605868 |
| C | 1.667148  | -0.693838 | 0.283686  |
| H | 1.465438  | 0.365589  | 0.563297  |
| H | 2.735467  | -1.003882 | 0.185736  |
| C | -1.860201 | 0.686625  | -0.159450 |
| H | -2.905351 | 1.060803  | -0.040682 |
| H | -1.727173 | -0.396057 | -0.386247 |
| C | -0.872853 | 8.044399  | 3.422532  |
| H | -0.815169 | 8.972124  | 4.041080  |
| H | 0.083567  | 7.502496  | 3.239167  |

4

CH2OSVP SCF Done: -114.400758933 A.U.

|   |           |           |           |
|---|-----------|-----------|-----------|
| O | -0.674156 | 0.000002  | -0.000007 |
| C | 0.522066  | -0.000011 | 0.000028  |
| H | 1.130418  | 0.942811  | -0.000055 |
| H | 1.130435  | -0.942760 | -0.000055 |

3

trosSVP+CuCl2metal SCF Done: -2560.41522075 A.U.

|    |          |          |           |
|----|----------|----------|-----------|
| Cu | 0.000000 | 0.000000 | 0.000000  |
| Cl | 0.000000 | 0.000000 | 2.095716  |
| Cl | 0.000000 | 0.000000 | -2.095716 |

54

troSVP+CuCl2 SCF Done: -3669.46230368 A.U.

|   |           |           |           |
|---|-----------|-----------|-----------|
| C | -5.407863 | -3.516167 | -0.832395 |
| C | -6.574300 | -2.804652 | -1.110512 |
| H | -7.478483 | -3.331550 | -1.422947 |
| C | -5.425650 | -0.741667 | -0.592065 |
| H | -5.444156 | 0.344944  | -0.479322 |
| C | -4.242794 | -1.444027 | -0.305378 |
| C | -4.253796 | -2.843087 | -0.439094 |
| H | -3.334201 | -3.406731 | -0.258778 |
| C | -3.032603 | -0.732763 | 0.118089  |
| C | -2.146285 | -1.108105 | 1.125356  |
| N | -1.187375 | -0.141147 | 1.160461  |
| N | -1.399357 | 0.818438  | 0.232150  |
| C | -2.517747 | 0.485689  | -0.409321 |
| C | -3.054993 | 1.303517  | -1.521429 |
| H | -2.254106 | 1.850376  | -2.031914 |
| H | -3.743539 | 2.075243  | -1.148715 |
| H | -3.593399 | 0.673453  | -2.242021 |
| C | -2.166585 | -2.251287 | 2.067621  |
| H | -1.447397 | -3.040136 | 1.795258  |
| H | -3.161283 | -2.712860 | 2.076781  |
| H | -1.942450 | -1.942649 | 3.098986  |
| C | 0.000003  | -0.033149 | 1.964268  |
| H | -0.000037 | 0.946913  | 2.470232  |
| H | -0.000003 | -0.821520 | 2.724107  |
| N | 1.187434  | -0.141087 | 1.160531  |
| N | 1.399428  | 0.818518  | 0.232238  |
| C | 2.517812  | 0.485760  | -0.409242 |
| C | 3.032651  | -0.732709 | 0.118145  |
| C | 2.146326  | -1.108061 | 1.125401  |
| C | 2.166610  | -2.251280 | 2.067621  |

|    |           |           |           |
|----|-----------|-----------|-----------|
| H  | 1.447537  | -3.040189 | 1.795125  |
| H  | 1.942310  | -1.942713 | 3.098970  |
| H  | 3.161351  | -2.712760 | 2.076890  |
| C  | 3.055077  | 1.303570  | -1.521355 |
| H  | 3.593501  | 0.673487  | -2.241916 |
| H  | 3.743614  | 2.075307  | -1.148648 |
| H  | 2.254202  | 1.850416  | -2.031871 |
| C  | 4.242835  | -1.443981 | -0.305328 |
| C  | 5.425699  | -0.741633 | -0.592013 |
| H  | 5.444219  | 0.344978  | -0.479262 |
| C  | 6.576823  | -1.414982 | -0.991637 |
| H  | 7.486521  | -0.849137 | -1.204965 |
| C  | 6.574325  | -2.804627 | -1.110476 |
| H  | 7.478501  | -3.331533 | -1.422918 |
| C  | 5.407881  | -3.516131 | -0.832358 |
| C  | 4.253823  | -2.843040 | -0.439049 |
| H  | 3.334224  | -3.406677 | -0.258732 |
| C  | -6.576783 | -1.415007 | -0.991681 |
| H  | -7.486475 | -0.849153 | -1.205010 |
| Cu | -0.000026 | 2.402521  | 0.077889  |
| Cl | 1.677701  | 3.870972  | 0.042526  |
| Cl | -1.677901 | 3.870834  | 0.043039  |
| H  | 5.392167  | -4.603722 | -0.934669 |
| H  | -5.392161 | -4.603759 | -0.934701 |

3

trosSVP+PdCl<sub>2</sub>metal SCF Done: -1048.10818946 A.U.

|    |           |           |           |
|----|-----------|-----------|-----------|
| Pd | -0.000000 | -0.000000 | 0.622407  |
| Cl | -0.000000 | -1.675354 | -0.842080 |
| Cl | 0.000000  | 1.675354  | -0.842080 |

54

trosSVP+PdCl<sub>2</sub> SCF Done: -2157.20273611 A.U.

|   |           |           |           |
|---|-----------|-----------|-----------|
| C | -5.406691 | -3.670077 | -0.871038 |
| C | -6.585319 | -2.963964 | -1.108564 |
| H | -7.488796 | -3.491782 | -1.421453 |
| C | -5.450825 | -0.904164 | -0.548718 |
| H | -5.478743 | 0.178512  | -0.403894 |
| C | -4.255893 | -1.601389 | -0.302714 |
| C | -4.253408 | -2.995826 | -0.477349 |
| H | -3.324627 | -3.553698 | -0.329184 |
| C | -3.046888 | -0.888274 | 0.121383  |
| C | -2.142787 | -1.278563 | 1.106047  |
| N | -1.193387 | -0.301942 | 1.158509  |
| N | -1.436555 | 0.678637  | 0.255279  |
| C | -2.557518 | 0.348431  | -0.386035 |
| C | -3.110394 | 1.177218  | -1.481042 |
| H | -2.312608 | 1.717040  | -2.004945 |
| H | -3.789209 | 1.950553  | -1.094767 |
| H | -3.665686 | 0.552877  | -2.193536 |
| C | -2.140602 | -2.446033 | 2.017991  |
| H | -1.412624 | -3.217661 | 1.721029  |
| H | -3.128908 | -2.921124 | 2.019606  |
| H | -1.915645 | -2.161855 | 3.056192  |
| C | 0.000044  | -0.204268 | 1.958376  |
| H | 0.000055  | 0.768628  | 2.476026  |
| H | 0.000067  | -1.010411 | 2.699482  |
| N | 1.193466  | -0.301889 | 1.158456  |
| N | 1.436684  | 0.678778  | 0.255331  |
| C | 2.557689  | 0.348655  | -0.385920 |
| C | 3.047045  | -0.888102 | 0.121379  |
| C | 2.142890  | -1.278497 | 1.105959  |
| C | 2.140763  | -2.446158 | 2.017656  |
| H | 1.413754  | -3.218352 | 1.719793  |

|    |           |           |           |
|----|-----------|-----------|-----------|
| H  | 1.914596  | -2.162458 | 3.055716  |
| H  | 3.129470  | -2.920423 | 2.020077  |
| C  | 3.110549  | 1.177609  | -1.480836 |
| H  | 3.665436  | 0.553302  | -2.193680 |
| H  | 3.789800  | 1.950575  | -1.094581 |
| H  | 2.312789  | 1.717870  | -2.004317 |
| C  | 4.256069  | -1.601186 | -0.302692 |
| C  | 5.450918  | -0.903913 | -0.548977 |
| H  | 5.478765  | 0.178796  | -0.404410 |
| C  | 6.601264  | -1.578248 | -0.949060 |
| H  | 7.520480  | -1.016828 | -1.130852 |
| C  | 6.585538  | -2.963738 | -1.108484 |
| H  | 7.489025  | -3.491554 | -1.421347 |
| C  | 5.406993  | -3.669897 | -0.870689 |
| C  | 4.253695  | -2.995663 | -0.477028 |
| H  | 3.324985  | -3.553595 | -0.328653 |
| C  | -6.601150 | -1.578510 | -0.948837 |
| H  | -7.520437 | -1.017138 | -1.130419 |
| Pd | -0.000119 | 2.208929  | 0.084437  |
| Cl | 1.663695  | 3.812463  | -0.014235 |
| Cl | -1.664294 | 3.812121  | -0.014170 |
| H  | 5.381320  | -4.753768 | -1.005189 |
| H  | -5.380943 | -4.753918 | -1.005766 |

51

trosSVP SCF Done: -1108.98179886 A.U.

|   |          |           |           |
|---|----------|-----------|-----------|
| C | 5.491307 | 1.986157  | 1.117591  |
| C | 6.511927 | 1.826440  | 0.180859  |
| H | 7.439885 | 2.394871  | 0.274645  |
| C | 5.152664 | 0.211943  | -0.998751 |
| H | 5.035838 | -0.498973 | -1.820187 |
| C | 4.114019 | 0.356710  | -0.062144 |



|   |           |           |           |
|---|-----------|-----------|-----------|
| C | 4.306069  | 1.265329  | 0.994302  |
| H | 3.497985  | 1.427881  | 1.712988  |
| C | 2.868790  | -0.403403 | -0.194635 |
| C | 2.131419  | -1.005956 | 0.821697  |
| N | 1.046970  | -1.567748 | 0.208500  |
| N | 1.030644  | -1.368572 | -1.122576 |
| C | 2.130153  | -0.673347 | -1.385458 |
| C | 2.439429  | -0.257133 | -2.778299 |
| H | 1.525310  | -0.255724 | -3.383945 |
| H | 3.149875  | -0.941212 | -3.267190 |
| H | 2.887716  | 0.745537  | -2.811195 |
| C | 2.405970  | -1.134155 | 2.273576  |
| H | 1.748785  | -0.504448 | 2.895826  |
| H | 3.437713  | -0.830474 | 2.489007  |
| H | 2.291934  | -2.168675 | 2.628830  |
| C | -0.044120 | -2.281974 | 0.822957  |
| H | -0.078114 | -3.328046 | 0.489033  |
| H | 0.124211  | -2.269758 | 1.911363  |
| N | -1.326080 | -1.727098 | 0.484371  |
| N | -2.270689 | -2.542277 | -0.024099 |
| C | -3.326407 | -1.764968 | -0.229211 |
| C | -3.051038 | -0.412711 | 0.133484  |
| C | -1.737051 | -0.432355 | 0.595663  |
| C | -0.873026 | 0.637010  | 1.148946  |
| H | -0.138642 | 1.006445  | 0.414561  |
| H | -0.301838 | 0.289197  | 2.023037  |
| H | -1.480010 | 1.492273  | 1.471677  |
| C | -4.571848 | -2.332203 | -0.809481 |
| H | -5.039270 | -1.636367 | -1.520138 |
| H | -5.326429 | -2.558546 | -0.040332 |
| H | -4.351037 | -3.270702 | -1.332107 |

|   |           |           |           |
|---|-----------|-----------|-----------|
| C | -3.936334 | 0.748247  | 0.023225  |
| C | -5.305862 | 0.646881  | 0.326309  |
| H | -5.706977 | -0.308315 | 0.673300  |
| C | -6.150370 | 1.748461  | 0.218046  |
| H | -7.209803 | 1.643104  | 0.464370  |
| C | -5.648665 | 2.983501  | -0.192221 |
| H | -6.311288 | 3.847878  | -0.275914 |
| C | -4.293657 | 3.102584  | -0.499858 |
| C | -3.450151 | 1.999158  | -0.398879 |
| H | -2.398482 | 2.096007  | -0.680984 |
| C | 6.334486  | 0.938187  | -0.879692 |
| H | 7.128225  | 0.803051  | -1.618372 |
| H | -3.891035 | 4.061567  | -0.835275 |
| H | 5.613298  | 2.688881  | 1.945477  |

Truncated structures:

51

troscis SCF Done: -1108.98192213 A.U.

|   |          |           |           |
|---|----------|-----------|-----------|
| C | 5.578554 | 1.914106  | 1.095555  |
| C | 6.553529 | 1.770205  | 0.108903  |
| H | 7.495960 | 2.317876  | 0.181770  |
| C | 5.111247 | 0.227433  | -1.066104 |
| H | 4.944292 | -0.451362 | -1.905850 |
| C | 4.116886 | 0.358141  | -0.080557 |
| C | 4.374055 | 1.221473  | 0.999497  |
| H | 3.602068 | 1.372222  | 1.759407  |
| C | 2.853434 | -0.375051 | -0.192480 |
| C | 2.145346 | -1.010592 | 0.824802  |
| N | 1.034158 | -1.537148 | 0.228204  |
| N | 0.972339 | -1.283625 | -1.091736 |
| C | 2.068774 | -0.588567 | -1.366121 |

|   |           |           |           |
|---|-----------|-----------|-----------|
| C | 2.329793  | -0.117069 | -2.751021 |
| H | 1.395984  | -0.100792 | -3.325742 |
| H | 3.029047  | -0.775454 | -3.288933 |
| H | 2.768679  | 0.890401  | -2.761370 |
| C | 2.465520  | -1.195528 | 2.260957  |
| H | 1.842665  | -0.573991 | 2.925330  |
| H | 3.510226  | -0.920524 | 2.451615  |
| H | 2.341048  | -2.239183 | 2.584707  |
| C | -0.040176 | -2.275765 | 0.847876  |
| H | -0.057961 | -3.321220 | 0.509964  |
| H | 0.133550  | -2.263457 | 1.935249  |
| N | -1.329075 | -1.739210 | 0.516238  |
| N | -2.233622 | -2.534149 | -0.088128 |
| C | -3.287009 | -1.757810 | -0.306596 |
| C | -3.048518 | -0.423613 | 0.142022  |
| C | -1.761030 | -0.455533 | 0.671298  |
| C | -0.934349 | 0.588732  | 1.319909  |
| H | -0.181739 | 1.013408  | 0.635300  |
| H | -0.388735 | 0.195245  | 2.191058  |
| H | -1.564723 | 1.414880  | 1.672853  |
| C | -4.490726 | -2.307702 | -0.982577 |
| H | -4.914221 | -1.591604 | -1.700720 |
| H | -5.292911 | -2.559635 | -0.271852 |
| H | -4.231346 | -3.228364 | -1.519296 |
| C | -3.938590 | 0.734567  | 0.043685  |
| C | -5.324561 | 0.605536  | 0.245055  |
| H | -5.738156 | -0.372250 | 0.503520  |
| C | -6.171421 | 1.705962  | 0.146810  |
| H | -7.244210 | 1.578295  | 0.311845  |
| C | -5.656743 | 2.967476  | -0.150495 |
| H | -6.321933 | 3.830778  | -0.225052 |

|   |           |          |           |
|---|-----------|----------|-----------|
| C | -4.285472 | 3.114335 | -0.357323 |
| C | -3.439225 | 2.012488 | -0.267661 |
| H | -2.372320 | 2.133685 | -0.472973 |
| C | 6.311964  | 0.925172 | -0.973642 |
| H | 7.070329  | 0.801327 | -1.750611 |
| H | -3.871422 | 4.095010 | -0.605154 |
| H | 5.751534  | 2.583263 | 1.942147  |

51

trosisomer000TScistrans SCF Done: -1108.97904770 A.U.

|   |           |           |           |
|---|-----------|-----------|-----------|
| C | 5.268329  | -2.583557 | -0.597228 |
| C | 6.561004  | -2.082560 | -0.446185 |
| H | 7.424687  | -2.740143 | -0.568983 |
| C | 5.639248  | 0.101320  | 0.024490  |
| H | 5.792716  | 1.160193  | 0.246869  |
| C | 4.328750  | -0.385175 | -0.126410 |
| C | 4.166561  | -1.747558 | -0.435694 |
| H | 3.156966  | -2.158418 | -0.522233 |
| C | 3.175472  | 0.501047  | 0.044460  |
| C | 2.012644  | 0.534838  | -0.717139 |
| N | 1.245377  | 1.524837  | -0.175532 |
| N | 1.814947  | 2.111807  | 0.899546  |
| C | 2.990804  | 1.515212  | 1.033481  |
| C | 3.911278  | 1.914403  | 2.129614  |
| H | 3.352981  | 2.423482  | 2.924547  |
| H | 4.692767  | 2.609503  | 1.785722  |
| H | 4.425490  | 1.044967  | 2.562415  |
| C | 1.577107  | -0.257313 | -1.888422 |
| H | 0.885740  | -1.062728 | -1.595608 |
| H | 2.438846  | -0.715521 | -2.390047 |
| H | 1.050614  | 0.361544  | -2.630380 |
| C | -0.059944 | 1.923985  | -0.571180 |

|   |           |           |           |
|---|-----------|-----------|-----------|
| H | -0.255152 | 2.889873  | -0.083737 |
| H | -0.100169 | 2.080275  | -1.663060 |
| N | -1.091845 | 0.961920  | -0.200269 |
| N | -0.788834 | -0.187894 | 0.423934  |
| C | -1.955767 | -0.796844 | 0.616226  |
| C | -3.033358 | -0.028066 | 0.089514  |
| C | -2.424895 | 1.112875  | -0.433195 |
| C | -2.984229 | 2.325847  | -1.075591 |
| H | -2.827316 | 2.341667  | -2.166824 |
| H | -2.535341 | 3.247490  | -0.675757 |
| H | -4.065884 | 2.386564  | -0.903905 |
| C | -2.003394 | -2.125313 | 1.280802  |
| H | -2.760125 | -2.779244 | 0.825039  |
| H | -2.250325 | -2.046646 | 2.350838  |
| H | -1.026003 | -2.618529 | 1.213640  |
| C | -4.459683 | -0.358852 | 0.077349  |
| C | -5.070885 | -0.973470 | 1.184584  |
| H | -4.473599 | -1.186007 | 2.074511  |
| C | -6.427190 | -1.287292 | 1.174718  |
| H | -6.878853 | -1.759535 | 2.050709  |
| C | -7.211037 | -0.992316 | 0.059465  |
| H | -8.275743 | -1.236340 | 0.053572  |
| C | -6.621542 | -0.386988 | -1.049756 |
| C | -5.263554 | -0.079587 | -1.043063 |
| H | -4.806090 | 0.361798  | -1.932891 |
| C | 6.740116  | -0.735673 | -0.132127 |
| H | 7.748306  | -0.330356 | -0.014974 |
| H | -7.222454 | -0.162140 | -1.934484 |
| H | 5.115423  | -3.640211 | -0.831022 |

51

trosisomer000 SCF Done: -1108.97904344 A.U.

|   |           |           |           |
|---|-----------|-----------|-----------|
| C | -5.246199 | -2.596666 | 0.604086  |
| C | -6.542107 | -2.103484 | 0.455018  |
| H | -7.401596 | -2.766322 | 0.578961  |
| C | -5.634211 | 0.086016  | -0.016470 |
| H | -5.794427 | 1.143961  | -0.238364 |
| C | -4.320503 | -0.392567 | 0.132271  |
| C | -4.149711 | -1.754056 | 0.440992  |
| H | -3.137572 | -2.158970 | 0.525690  |
| C | -3.173000 | 0.500667  | -0.040544 |
| C | -2.006590 | 0.537909  | 0.715421  |
| N | -1.247502 | 1.534229  | 0.174059  |
| N | -1.825263 | 2.122050  | -0.896012 |
| C | -2.998496 | 1.519598  | -1.026628 |
| C | -3.926039 | 1.917967  | -2.117071 |
| H | -3.373807 | 2.432060  | -2.913015 |
| H | -4.709024 | 2.608415  | -1.767271 |
| H | -4.438276 | 1.047507  | -2.550156 |
| C | -1.559931 | -0.256707 | 1.880896  |
| H | -0.868720 | -1.059627 | 1.580673  |
| H | -2.416406 | -0.718948 | 2.387830  |
| H | -1.029409 | 0.361357  | 2.620639  |
| C | 0.058748  | 1.936381  | 0.563600  |
| H | 0.249232  | 2.902360  | 0.074158  |
| H | 0.104382  | 2.093525  | 1.655095  |
| N | 1.089706  | 0.974656  | 0.189426  |
| N | 0.787309  | -0.162848 | -0.457294 |
| C | 1.953061  | -0.774321 | -0.648306 |
| C | 3.029232  | -0.019938 | -0.098126 |
| C | 2.421143  | 1.115114  | 0.437781  |
| C | 2.979733  | 2.314234  | 1.106412  |
| H | 2.812624  | 2.311749  | 2.196264  |

|   |           |           |           |
|---|-----------|-----------|-----------|
| H | 2.538834  | 3.244827  | 0.718647  |
| H | 4.063232  | 2.372967  | 0.946079  |
| C | 2.000141  | -2.092167 | -1.333766 |
| H | 2.749579  | -2.757202 | -0.882039 |
| H | 2.256834  | -1.997574 | -2.400215 |
| H | 1.019668  | -2.581215 | -1.283135 |
| C | 4.453494  | -0.358884 | -0.077232 |
| C | 5.071634  | -0.961176 | -1.187439 |
| H | 4.481819  | -1.157001 | -2.086123 |
| C | 6.425841  | -1.283670 | -1.169195 |
| H | 6.882809  | -1.746265 | -2.047585 |
| C | 7.200785  | -1.009678 | -0.042505 |
| H | 8.263856  | -1.260471 | -0.030037 |
| C | 6.604411  | -0.416617 | 1.069656  |
| C | 5.248384  | -0.100786 | 1.054602  |
| H | 4.785242  | 0.330147  | 1.946578  |
| C | -6.729765 | -0.757646 | 0.141481  |
| H | -7.740545 | -0.358386 | 0.025838  |
| H | 7.198167  | -0.208226 | 1.963211  |
| H | -5.086565 | -3.652420 | 0.837417  |

51

troisomer020 SCF Done: -1108.97988240 A.U.

|   |          |           |           |
|---|----------|-----------|-----------|
| C | 4.760592 | -2.905929 | -0.342887 |
| C | 6.111404 | -2.564247 | -0.401527 |
| H | 6.873666 | -3.341705 | -0.490406 |
| C | 5.508405 | -0.229486 | -0.230816 |
| H | 5.809149 | 0.820629  | -0.210751 |
| C | 4.141490 | -0.554537 | -0.172438 |
| C | 3.789028 | -1.915219 | -0.224819 |
| H | 2.736257 | -2.197745 | -0.141160 |
| C | 3.122589 | 0.489906  | -0.049663 |

|   |           |           |           |
|---|-----------|-----------|-----------|
| C | 1.874451  | 0.527788  | -0.662443 |
| N | 1.288047  | 1.681469  | -0.233612 |
| N | 2.052589  | 2.380144  | 0.630348  |
| C | 3.173934  | 1.680006  | 0.738410  |
| C | 4.265316  | 2.154092  | 1.628580  |
| H | 3.869465  | 2.868971  | 2.360074  |
| H | 5.066061  | 2.666694  | 1.073471  |
| H | 4.734901  | 1.321361  | 2.170608  |
| C | 1.197530  | -0.396632 | -1.600542 |
| H | 0.513103  | -1.083295 | -1.076421 |
| H | 1.929145  | -1.005071 | -2.147622 |
| H | 0.592555  | 0.145718  | -2.343151 |
| C | -0.023214 | 2.140031  | -0.546532 |
| H | -0.112560 | 3.141860  | -0.099652 |
| H | -0.162596 | 2.239774  | -1.635925 |
| N | -1.055902 | 1.244242  | -0.047070 |
| N | -0.791890 | 0.370244  | 0.938782  |
| C | -1.926037 | -0.297483 | 1.125099  |
| C | -2.938754 | 0.140009  | 0.222761  |
| C | -2.327746 | 1.145062  | -0.526291 |
| C | -2.845865 | 2.032050  | -1.595428 |
| H | -2.464267 | 1.763098  | -2.594798 |
| H | -2.580094 | 3.085659  | -1.423038 |
| H | -3.940156 | 1.973855  | -1.642951 |
| C | -1.998867 | -1.371744 | 2.149471  |
| H | -2.595698 | -2.226122 | 1.800472  |
| H | -2.458970 | -1.021827 | 3.086518  |
| H | -0.990595 | -1.723898 | 2.399413  |
| C | -4.308145 | -0.360636 | 0.083865  |
| C | -5.078228 | -0.693560 | 1.212011  |
| H | -4.652476 | -0.558364 | 2.209189  |



|   |           |           |           |
|---|-----------|-----------|-----------|
| C | -6.381853 | -1.163763 | 1.078951  |
| H | -6.961161 | -1.409822 | 1.972245  |
| C | -6.953136 | -1.310967 | -0.184858 |
| H | -7.977099 | -1.677459 | -0.287805 |
| C | -6.202427 | -0.992221 | -1.315680 |
| C | -4.895973 | -0.529181 | -1.183110 |
| H | -4.304823 | -0.318385 | -2.078429 |
| C | 6.479649  | -1.220563 | -0.342257 |
| H | 7.534818  | -0.940163 | -0.390329 |
| H | -6.633810 | -1.116853 | -2.312068 |
| H | 4.460422  | -3.956246 | -0.375760 |

51

trosisomer040 SCF Done: -1108.98141032 A.U.

|   |           |           |           |
|---|-----------|-----------|-----------|
| C | -4.342480 | -3.101119 | -0.144959 |
| C | -5.711527 | -2.928417 | 0.056129  |
| H | -6.384442 | -3.788798 | 0.041859  |
| C | -5.357571 | -0.547450 | 0.290092  |
| H | -5.762517 | 0.448876  | 0.483199  |
| C | -3.973422 | -0.702682 | 0.094811  |
| C | -3.486823 | -2.003278 | -0.131534 |
| H | -2.421807 | -2.147700 | -0.330617 |
| C | -3.066690 | 0.446456  | 0.117575  |
| C | -1.777530 | 0.488125  | 0.640977  |
| N | -1.324007 | 1.751500  | 0.405441  |
| N | -2.215522 | 2.525046  | -0.244141 |
| C | -3.282651 | 1.754575  | -0.412230 |
| C | -4.480850 | 2.283725  | -1.113926 |
| H | -4.210392 | 3.168107  | -1.703476 |
| H | -5.274818 | 2.588528  | -0.414675 |
| H | -4.919620 | 1.534422  | -1.787761 |
| C | -0.958379 | -0.525274 | 1.345933  |

|   |           |           |           |
|---|-----------|-----------|-----------|
| H | -0.235849 | -1.015561 | 0.673129  |
| H | -1.596032 | -1.307827 | 1.776773  |
| H | -0.375957 | -0.081063 | 2.167661  |
| C | -0.031299 | 2.277429  | 0.722230  |
| H | -0.032653 | 3.313880  | 0.354335  |
| H | 0.142163  | 2.297706  | 1.809980  |
| N | 1.034953  | 1.499272  | 0.128486  |
| N | 0.894683  | 1.023049  | -1.121761 |
| C | 2.000539  | 0.327106  | -1.356240 |
| C | 2.866820  | 0.334061  | -0.222754 |
| C | 2.198740  | 1.105992  | 0.724787  |
| C | 2.591375  | 1.524347  | 2.091985  |
| H | 2.002824  | 1.023444  | 2.878725  |
| H | 2.479158  | 2.607855  | 2.244876  |
| H | 3.644781  | 1.277469  | 2.272755  |
| C | 2.190815  | -0.364650 | -2.657571 |
| H | 2.702738  | -1.328758 | -2.530586 |
| H | 2.796977  | 0.229630  | -3.358468 |
| H | 1.221098  | -0.538668 | -3.139550 |
| C | 4.157121  | -0.344455 | -0.077097 |
| C | 5.090485  | -0.350019 | -1.128352 |
| H | 4.857521  | 0.185689  | -2.051921 |
| C | 6.313630  | -1.002384 | -1.000055 |
| H | 7.023572  | -0.987484 | -1.830670 |
| C | 6.637735  | -1.665058 | 0.183433  |
| H | 7.597710  | -2.176776 | 0.283813  |
| C | 5.723329  | -1.673287 | 1.235773  |
| C | 4.496804  | -1.026292 | 1.105272  |
| H | 3.772046  | -1.072329 | 1.923022  |
| C | -6.214036 | -1.644924 | 0.268707  |
| H | -7.285105 | -1.496815 | 0.427922  |

|   |           |           |           |
|---|-----------|-----------|-----------|
| H | 5.960564  | -2.201295 | 2.162760  |
| H | -3.937534 | -4.099759 | -0.327167 |

51

trosisomer060 SCF Done: -1108.98167784 A.U.

|   |           |           |           |
|---|-----------|-----------|-----------|
| C | -4.290850 | -3.084785 | -0.624991 |
| C | -5.642347 | -2.985396 | -0.296644 |
| H | -6.302908 | -3.848112 | -0.409631 |
| C | -5.303213 | -0.672416 | 0.319665  |
| H | -5.704002 | 0.265976  | 0.710786  |
| C | -3.936895 | -0.754457 | -0.003087 |
| C | -3.450905 | -1.983061 | -0.486126 |
| H | -2.402669 | -2.061804 | -0.786310 |
| C | -3.056204 | 0.406094  | 0.143843  |
| C | -1.735997 | 0.415123  | 0.588770  |
| N | -1.331873 | 1.715452  | 0.519457  |
| N | -2.288604 | 2.542762  | 0.053430  |
| C | -3.343611 | 1.768665  | -0.165414 |
| C | -4.598499 | 2.350389  | -0.709143 |
| H | -4.390492 | 3.315666  | -1.186609 |
| H | -5.350509 | 2.530534  | 0.074574  |
| H | -5.063519 | 1.685509  | -1.450515 |
| C | -0.866922 | -0.674603 | 1.091655  |
| H | -0.120859 | -0.996305 | 0.346469  |
| H | -1.470000 | -1.550938 | 1.360404  |
| H | -0.309332 | -0.371138 | 1.990460  |
| C | -0.046992 | 2.276198  | 0.849127  |
| H | -0.082174 | 3.317639  | 0.503543  |
| H | 0.121313  | 2.274244  | 1.937495  |
| N | 1.044132  | 1.562473  | 0.240527  |
| N | 1.094200  | 1.480653  | -1.102780 |
| C | 2.194134  | 0.789493  | -1.370661 |

|   |           |           |           |
|---|-----------|-----------|-----------|
| C | 2.871838  | 0.410727  | -0.172282 |
| C | 2.096011  | 0.940949  | 0.854868  |
| C | 2.316211  | 0.954659  | 2.321143  |
| H | 1.644098  | 0.273983  | 2.869320  |
| H | 2.181154  | 1.957193  | 2.752840  |
| H | 3.343047  | 0.641078  | 2.546783  |
| C | 2.564825  | 0.484174  | -2.776921 |
| H | 2.996056  | -0.522062 | -2.872239 |
| H | 3.311511  | 1.190063  | -3.171894 |
| H | 1.682254  | 0.552981  | -3.424002 |
| C | 4.107451  | -0.366378 | -0.050088 |
| C | 5.179006  | -0.154189 | -0.935523 |
| H | 5.092079  | 0.619306  | -1.702283 |
| C | 6.353823  | -0.893179 | -0.833571 |
| H | 7.172831  | -0.705461 | -1.532269 |
| C | 6.491571  | -1.862920 | 0.159233  |
| H | 7.413569  | -2.443288 | 0.239487  |
| C | 5.438970  | -2.088997 | 1.045420  |
| C | 4.260339  | -1.354849 | 0.938724  |
| H | 3.427755  | -1.567943 | 1.615373  |
| C | -6.144298 | -1.771805 | 0.173060  |
| H | -7.201560 | -1.682214 | 0.435005  |
| H | 5.531276  | -2.854588 | 1.819782  |
| H | -3.888600 | -4.026302 | -1.007345 |

51

troisomer080TSciscis SCF Done: -1108.97793847 A.U.

|   |          |           |           |
|---|----------|-----------|-----------|
| C | 5.118615 | 2.698655  | -0.640474 |
| C | 6.373036 | 2.138291  | -0.879003 |
| H | 7.224245 | 2.776428  | -1.126850 |
| C | 5.444012 | -0.057999 | -0.484481 |
| H | 5.587035 | -1.137683 | -0.401806 |

|   |           |           |           |
|---|-----------|-----------|-----------|
| C | 4.171080  | 0.488075  | -0.238267 |
| C | 4.031769  | 1.885143  | -0.330087 |
| H | 3.046944  | 2.336642  | -0.184952 |
| C | 3.038615  | -0.376927 | 0.098099  |
| C | 2.016579  | -0.120022 | 1.009018  |
| N | 1.214415  | -1.228947 | 0.990726  |
| N | 1.645100  | -2.171758 | 0.129837  |
| C | 2.747686  | -1.677619 | -0.413290 |
| C | 3.488866  | -2.460648 | -1.436565 |
| H | 2.825807  | -3.208859 | -1.887037 |
| H | 4.346033  | -3.003040 | -1.008515 |
| H | 3.884261  | -1.814860 | -2.233181 |
| C | 1.800911  | 1.038943  | 1.907542  |
| H | 1.130562  | 1.799641  | 1.476835  |
| H | 2.756497  | 1.539567  | 2.112609  |
| H | 1.373786  | 0.744932  | 2.877227  |
| C | 0.000000  | -1.486034 | 1.723131  |
| H | -0.000010 | -2.548379 | 1.993061  |
| H | -0.000010 | -0.881826 | 2.637813  |
| N | -1.214394 | -1.228935 | 0.990697  |
| N | -1.645095 | -2.171770 | 0.129841  |
| C | -2.747692 | -1.677652 | -0.413278 |
| C | -3.038621 | -0.376947 | 0.098083  |
| C | -2.016565 | -0.120011 | 1.008977  |
| C | -1.800962 | 1.038942  | 1.907534  |
| H | -1.130887 | 1.799834  | 1.476745  |
| H | -1.373557 | 0.744963  | 2.877104  |
| H | -2.756618 | 1.539336  | 2.112840  |
| C | -3.488851 | -2.460716 | -1.436543 |
| H | -3.884085 | -1.814978 | -2.233279 |
| H | -4.346121 | -3.002976 | -1.008534 |

|   |           |           |           |
|---|-----------|-----------|-----------|
| H | -2.825813 | -3.209044 | -1.886854 |
| C | -4.171084 | 0.488059  | -0.238270 |
| C | -5.443998 | -0.058003 | -0.484614 |
| H | -5.587030 | -1.137691 | -0.402038 |
| C | -6.528034 | 0.754526  | -0.802860 |
| H | -7.506493 | 0.302570  | -0.983530 |
| C | -6.373021 | 2.138317  | -0.878987 |
| H | -7.224220 | 2.776467  | -1.126832 |
| C | -5.118622 | 2.698669  | -0.640319 |
| C | -4.031789 | 1.885138  | -0.329940 |
| H | -3.046980 | 2.336636  | -0.184701 |
| C | 6.528061  | 0.754509  | -0.802737 |
| H | 7.506535  | 0.302546  | -0.983304 |
| H | -4.981396 | 3.780767  | -0.708140 |
| H | 4.981383  | 3.780746  | -0.708410 |

51

trosisomer080 SCF Done: -1108.97771131 A.U.

|   |          |           |           |
|---|----------|-----------|-----------|
| C | 5.006018 | 2.721261  | -0.317404 |
| C | 6.222323 | 2.206827  | -0.765015 |
| H | 7.059679 | 2.875762  | -0.976232 |
| C | 5.290699 | -0.022739 | -0.676362 |
| H | 5.417396 | -1.100939 | -0.799076 |
| C | 4.057007 | 0.476734  | -0.221891 |
| C | 3.936947 | 1.868814  | -0.054719 |
| H | 2.977389 | 2.288974  | 0.258563  |
| C | 2.934559 | -0.421556 | 0.055200  |
| C | 2.009738 | -0.323462 | 1.092076  |
| N | 1.157123 | -1.382981 | 0.930493  |
| N | 1.465648 | -2.146388 | -0.134255 |
| C | 2.540229 | -1.586234 | -0.670372 |
| C | 3.159178 | -2.171827 | -1.887939 |

|   |           |           |           |
|---|-----------|-----------|-----------|
| H | 2.430283  | -2.798213 | -2.415935 |
| H | 4.023204  | -2.811218 | -1.649366 |
| H | 3.518171  | -1.392366 | -2.574456 |
| C | 1.947636  | 0.622750  | 2.232516  |
| H | 1.219242  | 1.435953  | 2.088985  |
| H | 2.926975  | 1.097528  | 2.375575  |
| H | 1.690598  | 0.122528  | 3.177876  |
| C | -0.010583 | -1.715153 | 1.709897  |
| H | 0.006279  | -2.794143 | 1.907716  |
| H | 0.038977  | -1.175372 | 2.662442  |
| N | -1.263757 | -1.426816 | 1.061648  |
| N | -1.725985 | -2.299126 | 0.142992  |
| C | -2.781610 | -1.712868 | -0.401213 |
| C | -2.990622 | -0.410682 | 0.146219  |
| C | -1.975037 | -0.257574 | 1.085138  |
| C | -1.678764 | 0.867672  | 2.002724  |
| H | -0.935528 | 1.568935  | 1.589898  |
| H | -1.297740 | 0.527561  | 2.976712  |
| H | -2.589555 | 1.450360  | 2.194103  |
| C | -3.560183 | -2.406132 | -1.460102 |
| H | -3.884310 | -1.708980 | -2.245516 |
| H | -4.468183 | -2.886293 | -1.063519 |
| H | -2.950923 | -3.194241 | -1.918542 |
| C | -4.024456 | 0.564276  | -0.208121 |
| C | -5.347705 | 0.165063  | -0.467062 |
| H | -5.614828 | -0.890685 | -0.376895 |
| C | -6.324235 | 1.095312  | -0.812118 |
| H | -7.346599 | 0.759516  | -1.002821 |
| C | -6.006083 | 2.449989  | -0.906445 |
| H | -6.773416 | 3.178937  | -1.177038 |
| C | -4.698473 | 2.864206  | -0.656662 |

|   |           |          |           |
|---|-----------|----------|-----------|
| C | -3.720929 | 1.933590 | -0.315985 |
| H | -2.691149 | 2.265887 | -0.160058 |
| C | 6.357126  | 0.830372 | -0.945773 |
| H | 7.306232  | 0.415359 | -1.293964 |
| H | -4.433918 | 3.921332 | -0.739474 |
| H | 4.883839  | 3.799158 | -0.184651 |

51

troisomer100 SCF Done: -1108.98054737 A.U.

51

troisomer080 SCF Done: -1108.97771131 A.U.

|   |          |           |           |
|---|----------|-----------|-----------|
| C | 5.165770 | 2.315239  | 0.714020  |
| C | 6.182306 | 2.108737  | -0.217830 |
| H | 7.048646 | 2.773589  | -0.244729 |
| C | 4.976127 | 0.200723  | -1.083659 |
| H | 4.920461 | -0.640388 | -1.778700 |
| C | 3.940631 | 0.392784  | -0.151878 |
| C | 4.057177 | 1.473225  | 0.741906  |
| H | 3.246186 | 1.673910  | 1.447802  |
| C | 2.768900 | -0.485248 | -0.131814 |
| C | 2.067173 | -0.937692 | 0.983267  |
| N | 1.037614 | -1.692960 | 0.491931  |
| N | 1.021770 | -1.750538 | -0.851784 |
| C | 2.067744 | -1.037153 | -1.246824 |
| C | 2.352910 | -0.875399 | -2.696098 |
| H | 1.457695 | -1.117308 | -3.281485 |
| H | 3.156520 | -1.543946 | -3.041015 |
| H | 2.664756 | 0.150543  | -2.937283 |
| C | 2.339607 | -0.773597 | 2.432259  |
| H | 1.656705 | -0.062124 | 2.924776  |
| H | 3.358231 | -0.394494 | 2.581975  |



|   |           |           |           |
|---|-----------|-----------|-----------|
| H | 2.266709  | -1.725249 | 2.978794  |
| C | -0.055270 | -2.288867 | 1.226330  |
| H | -0.088408 | -3.373028 | 1.055982  |
| H | 0.115230  | -2.102473 | 2.295487  |
| N | -1.335024 | -1.781957 | 0.818113  |
| N | -2.089474 | -2.512243 | -0.029559 |
| C | -3.075029 | -1.708329 | -0.400466 |
| C | -2.931444 | -0.409494 | 0.177574  |
| C | -1.778729 | -0.496148 | 0.950106  |
| C | -1.084324 | 0.498423  | 1.800056  |
| H | -0.182994 | 0.908927  | 1.312400  |
| H | -0.764473 | 0.064411  | 2.760122  |
| H | -1.747916 | 1.341921  | 2.028182  |
| C | -4.125244 | -2.191390 | -1.334090 |
| H | -4.412458 | -1.413455 | -2.055303 |
| H | -5.043567 | -2.496364 | -0.808742 |
| H | -3.762838 | -3.065978 | -1.887773 |
| C | -3.781581 | 0.766212  | -0.023061 |
| C | -5.181866 | 0.652617  | -0.076184 |
| H | -5.643957 | -0.328022 | 0.062066  |
| C | -5.986196 | 1.771023  | -0.277113 |
| H | -7.072507 | 1.656577  | -0.309473 |
| C | -5.413143 | 3.033765  | -0.428026 |
| H | -6.045386 | 3.910618  | -0.585561 |
| C | -4.025879 | 3.165137  | -0.382176 |
| C | -3.221053 | 2.046055  | -0.187419 |
| H | -2.133345 | 2.155748  | -0.193148 |
| C | 6.079336  | 1.048880  | -1.118289 |
| H | 6.870749  | 0.876118  | -1.851800 |
| H | -3.564255 | 4.147033  | -0.513326 |
| H | 5.228479  | 3.150316  | 1.416302  |

trosisomer120 SCF Done: -1108.98191671 A.U.

|   |           |           |           |
|---|-----------|-----------|-----------|
| C | -5.550289 | 1.949809  | -1.063742 |
| C | -6.529087 | 1.796374  | -0.082277 |
| H | -7.465893 | 2.354654  | -0.146572 |
| C | -5.104687 | 0.217447  | 1.066339  |
| H | -4.946351 | -0.478706 | 1.893471  |
| C | -4.106415 | 0.358053  | 0.086215  |
| C | -4.352711 | 1.244060  | -0.977900 |
| H | -3.577107 | 1.401694  | -1.732747 |
| C | -2.848149 | -0.385347 | 0.188330  |
| C | -2.141577 | -1.007682 | -0.838022 |
| N | -1.033333 | -1.548376 | -0.248412 |
| N | -0.971749 | -1.315387 | 1.075255  |
| C | -2.065845 | -0.620433 | 1.359255  |
| C | -2.327641 | -0.169986 | 2.751000  |
| H | -1.394178 | -0.161105 | 3.326414  |
| H | -3.026327 | -0.837331 | 3.278546  |
| H | -2.767844 | 0.836640  | 2.776123  |
| C | -2.461319 | -1.169427 | -2.277082 |
| H | -1.836746 | -0.539277 | -2.931679 |
| H | -3.505323 | -0.889270 | -2.464255 |
| H | -2.339014 | -2.208277 | -2.616696 |
| C | 0.041763  | -2.276241 | -0.879784 |
| H | 0.061366  | -3.326073 | -0.556055 |
| H | -0.132784 | -2.249073 | -1.966545 |
| N | 1.330082  | -1.742242 | -0.542334 |
| N | 2.225427  | -2.533005 | 0.080950  |
| C | 3.274481  | -1.754505 | 0.312026  |
| C | 3.041066  | -0.422141 | -0.144886 |
| C | 1.761613  | -0.457899 | -0.693042 |

|   |           |           |           |
|---|-----------|-----------|-----------|
| C | 0.940103  | 0.583620  | -1.352497 |
| H | 0.182527  | 1.011201  | -0.675016 |
| H | 0.400717  | 0.186462  | -2.225862 |
| H | 1.572585  | 1.408650  | -1.704415 |
| C | 4.468996  | -2.300604 | 1.007086  |
| H | 4.881793  | -1.581409 | 1.728362  |
| H | 5.281255  | -2.554574 | 0.308643  |
| H | 4.202814  | -3.219438 | 1.543591  |
| C | 3.928111  | 0.737611  | -0.037977 |
| C | 5.316872  | 0.609988  | -0.220163 |
| H | 5.735375  | -0.368077 | -0.469446 |
| C | 6.160677  | 1.712088  | -0.114725 |
| H | 7.235770  | 1.585513  | -0.264852 |
| C | 5.640114  | 2.973945  | 0.170791  |
| H | 6.302947  | 3.838561  | 0.250918  |
| C | 4.265968  | 3.119388  | 0.358783  |
| C | 3.422665  | 2.015909  | 0.261788  |
| H | 2.352910  | 2.136242  | 0.452084  |
| C | -6.298675 | 0.928001  | 0.984076  |
| H | -7.060273 | 0.796561  | 1.756622  |
| H | 3.847077  | 4.100347  | 0.597161  |
| H | -5.714493 | 2.636977  | -1.897561 |

51

trosisomer140 SCF Done: -1108.98147178 A.U.

|   |           |           |           |
|---|-----------|-----------|-----------|
| C | -5.480049 | 1.957127  | -1.252587 |
| C | -6.542729 | 1.785092  | -0.366204 |
| H | -7.474397 | 2.337144  | -0.509834 |
| C | -5.217564 | 0.201629  | 0.889699  |
| H | -5.128275 | -0.502061 | 1.720948  |
| C | -4.137241 | 0.358214  | 0.003693  |
| C | -4.290695 | 1.256825  | -1.066727 |

|   |           |           |           |
|---|-----------|-----------|-----------|
| H | -3.450935 | 1.425142  | -1.747034 |
| C | -2.890666 | -0.386049 | 0.203275  |
| C | -2.117284 | -1.019119 | -0.765288 |
| N | -1.056294 | -1.561723 | -0.095592 |
| N | -1.090082 | -1.321496 | 1.229565  |
| C | -2.197524 | -0.618291 | 1.429047  |
| C | -2.559025 | -0.159195 | 2.795264  |
| H | -1.671492 | -0.154942 | 3.439374  |
| H | -3.300597 | -0.818646 | 3.271489  |
| H | -2.991586 | 0.850916  | 2.782968  |
| C | -2.336639 | -1.183203 | -2.222490 |
| H | -1.642406 | -0.583343 | -2.833984 |
| H | -3.353270 | -0.866661 | -2.486125 |
| H | -2.228897 | -2.228893 | -2.545851 |
| C | 0.043946  | -2.308800 | -0.641044 |
| H | 0.079148  | -3.327757 | -0.231589 |
| H | -0.112077 | -2.380785 | -1.729386 |
| N | 1.324685  | -1.723867 | -0.334556 |
| N | 2.332662  | -2.559818 | -0.016923 |
| C | 3.400447  | -1.784497 | 0.121138  |
| C | 3.074091  | -0.414418 | -0.103531 |
| C | 1.714396  | -0.418930 | -0.410274 |
| C | 0.803072  | 0.681931  | -0.804071 |
| H | 0.105615  | 0.960233  | 0.002157  |
| H | 0.189081  | 0.413995  | -1.677000 |
| H | 1.381660  | 1.574880  | -1.071317 |
| C | 4.707918  | -2.375259 | 0.508866  |
| H | 5.241491  | -1.740066 | 1.229864  |
| H | 5.378275  | -2.510943 | -0.353839 |
| H | 4.555736  | -3.363544 | 0.959432  |
| C | 3.959917  | 0.748299  | -0.015043 |

|   |           |           |           |
|---|-----------|-----------|-----------|
| C | 5.280288  | 0.688151  | -0.494520 |
| H | 5.638866  | -0.235353 | -0.955590 |
| C | 6.125366  | 1.791631  | -0.417111 |
| H | 7.145696  | 1.718904  | -0.801896 |
| C | 5.672263  | 2.988363  | 0.137672  |
| H | 6.334607  | 3.855239  | 0.194629  |
| C | 4.367966  | 3.065146  | 0.624380  |
| C | 3.525082  | 1.958881  | 0.554986  |
| H | 2.517835  | 2.020234  | 0.975435  |
| C | -6.404061 | 0.905950  | 0.707219  |
| H | -7.231066 | 0.761832  | 1.406782  |
| H | 4.005608  | 3.992799  | 1.074666  |
| H | -5.573075 | 2.653133  | -2.089859 |

51

trosisomer160TStranscis SCF Done: -1108.98022875 A.U.

|   |           |           |           |
|---|-----------|-----------|-----------|
| C | -4.986122 | 2.259453  | -1.419338 |
| C | -6.214857 | 2.093590  | -0.781256 |
| H | -7.057726 | 2.741429  | -1.032538 |
| C | -5.283906 | 0.270272  | 0.504530  |
| H | -5.412274 | -0.521719 | 1.246655  |
| C | -4.040482 | 0.418502  | -0.133258 |
| C | -3.911094 | 1.435962  | -1.095215 |
| H | -2.941235 | 1.597652  | -1.574842 |
| C | -2.908813 | -0.450503 | 0.201495  |
| C | -2.004398 | -1.034587 | -0.677911 |
| N | -1.118212 | -1.723932 | 0.102534  |
| N | -1.386640 | -1.622203 | 1.421464  |
| C | -2.474001 | -0.865497 | 1.496994  |
| C | -3.071250 | -0.537921 | 2.817248  |
| H | -2.331871 | -0.683481 | 3.613867  |
| H | -3.931694 | -1.182636 | 3.052857  |

|   |           |           |           |
|---|-----------|-----------|-----------|
| H | -3.430746 | 0.499856  | 2.853656  |
| C | -1.927184 | -1.021679 | -2.157467 |
| H | -1.051701 | -0.465872 | -2.532486 |
| H | -2.822084 | -0.551734 | -2.582205 |
| H | -1.861151 | -2.037062 | -2.576127 |
| C | 0.021110  | -2.466974 | -0.326482 |
| H | 0.098118  | -3.389020 | 0.264230  |
| H | -0.124011 | -2.754098 | -1.378669 |
| N | 1.292808  | -1.771798 | -0.194078 |
| N | 2.371955  | -2.557809 | -0.366816 |
| C | 3.418187  | -1.744061 | -0.302000 |
| C | 3.006411  | -0.402901 | -0.066518 |
| C | 1.612325  | -0.455153 | -0.008489 |
| C | 0.642353  | 0.652918  | 0.172834  |
| H | 0.040372  | 0.540721  | 1.087017  |
| H | -0.065113 | 0.741508  | -0.664643 |
| H | 1.183232  | 1.604451  | 0.238599  |
| C | 4.798532  | -2.279862 | -0.431121 |
| H | 5.493612  | -1.778895 | 0.257089  |
| H | 5.204578  | -2.146933 | -1.445805 |
| H | 4.808659  | -3.355733 | -0.218220 |
| C | 3.877626  | 0.768504  | 0.074616  |
| C | 4.940178  | 0.961216  | -0.825586 |
| H | 5.079076  | 0.248700  | -1.642648 |
| C | 5.798113  | 2.050203  | -0.707726 |
| H | 6.613660  | 2.177555  | -1.423967 |
| C | 5.613007  | 2.981868  | 0.313330  |
| H | 6.284885  | 3.838164  | 0.407578  |
| C | 4.565152  | 2.807537  | 1.216793  |
| C | 3.710458  | 1.712977  | 1.102835  |
| H | 2.914820  | 1.567250  | 1.838752  |

|   |           |          |           |
|---|-----------|----------|-----------|
| C | -6.356972 | 1.097931 | 0.184974  |
| H | -7.316090 | 0.958722 | 0.689801  |
| H | 4.418529  | 3.524938 | 2.028222  |
| H | -4.859458 | 3.045663 | -2.167602 |

51

trosisomer160 SCF Done: -1108.98047094 A.U.

|   |           |           |           |
|---|-----------|-----------|-----------|
| C | -5.093381 | 2.187003  | -1.379897 |
| C | -6.283758 | 2.029915  | -0.671241 |
| H | -7.145910 | 2.661959  | -0.895818 |
| C | -5.264899 | 0.255645  | 0.617132  |
| H | -5.345000 | -0.514058 | 1.388929  |
| C | -4.059964 | 0.394456  | -0.092376 |
| C | -3.993766 | 1.383510  | -1.089960 |
| H | -3.052970 | 1.539167  | -1.626162 |
| C | -2.901340 | -0.452316 | 0.204354  |
| C | -2.040932 | -1.053987 | -0.706958 |
| N | -1.101116 | -1.705246 | 0.042869  |
| N | -1.294163 | -1.562525 | 1.370521  |
| C | -2.386441 | -0.817930 | 1.485098  |
| C | -2.910136 | -0.452334 | 2.826344  |
| H | -2.126262 | -0.571887 | 3.583725  |
| H | -3.753750 | -1.091330 | 3.128909  |
| H | -3.271501 | 0.585226  | 2.851643  |
| C | -2.061031 | -1.094537 | -2.188235 |
| H | -1.225493 | -0.537034 | -2.643151 |
| H | -2.991520 | -0.655600 | -2.567374 |
| H | -2.005559 | -2.123252 | -2.574259 |
| C | 0.034228  | -2.437272 | -0.422314 |
| H | 0.105808  | -3.400055 | 0.100506  |
| H | -0.108696 | -2.645833 | -1.493928 |
| N | 1.303707  | -1.766177 | -0.210766 |

|   |           |           |           |
|---|-----------|-----------|-----------|
| N | 2.384793  | -2.569271 | -0.239133 |
| C | 3.431199  | -1.756786 | -0.166034 |
| C | 3.017386  | -0.397433 | -0.079142 |
| C | 1.623445  | -0.440087 | -0.124734 |
| C | 0.646379  | 0.676226  | -0.127709 |
| H | -0.006937 | 0.668957  | 0.758317  |
| H | -0.011773 | 0.660246  | -1.008969 |
| H | 1.182482  | 1.632707  | -0.144999 |
| C | 4.811931  | -2.306539 | -0.141410 |
| H | 5.471053  | -1.712011 | 0.506177  |
| H | 5.273047  | -2.318426 | -1.141242 |
| H | 4.803079  | -3.341839 | 0.220713  |
| C | 3.883374  | 0.779248  | 0.040958  |
| C | 5.039364  | 0.886837  | -0.751993 |
| H | 5.260679  | 0.100617  | -1.478281 |
| C | 5.888677  | 1.984081  | -0.644275 |
| H | 6.778362  | 2.043814  | -1.276119 |
| C | 5.602366  | 3.007758  | 0.258251  |
| H | 6.267621  | 3.870123  | 0.343605  |
| C | 4.461402  | 2.918116  | 1.054845  |
| C | 3.614870  | 1.816334  | 0.952111  |
| H | 2.743815  | 1.739310  | 1.608653  |
| C | -6.362546 | 1.063523  | 0.331234  |
| H | -7.291068 | 0.931629  | 0.892158  |
| H | 4.234403  | 3.708206  | 1.775157  |
| H | -5.015025 | 2.951327  | -2.156922 |

51

trosisomer180 SCF Done: -1108.98069383 A.U.

|   |           |           |          |
|---|-----------|-----------|----------|
| C | -4.911233 | -2.246664 | 1.556473 |
| C | -6.166200 | -2.097959 | 0.966672 |
| H | -6.994931 | -2.743812 | 1.265523 |



|   |           |           |           |
|---|-----------|-----------|-----------|
| C | -5.297230 | -0.298366 | -0.392460 |
| H | -5.459429 | 0.478784  | -1.143433 |
| C | -4.026402 | -0.432064 | 0.192929  |
| C | -3.853151 | -1.427163 | 1.171265  |
| H | -2.863613 | -1.576236 | 1.613442  |
| C | -2.915404 | 0.428933  | -0.221241 |
| C | -1.965726 | 1.039275  | 0.590289  |
| N | -1.131192 | 1.713617  | -0.256168 |
| N | -1.473490 | 1.577234  | -1.555360 |
| C | -2.558446 | 0.813510  | -1.549349 |
| C | -3.229595 | 0.449105  | -2.823814 |
| H | -2.528213 | 0.536063  | -3.662365 |
| H | -4.080885 | 1.110822  | -3.045650 |
| H | -3.622061 | -0.576825 | -2.794559 |
| C | -1.785338 | 1.049099  | 2.060080  |
| H | -0.905712 | 0.465425  | 2.378210  |
| H | -2.664339 | 0.621434  | 2.557131  |
| H | -1.646539 | 2.067390  | 2.452755  |
| C | 0.009037  | 2.495940  | 0.089445  |
| H | 0.124513  | 3.273509  | -0.677527 |
| H | -0.159059 | 2.997431  | 1.053275  |
| N | 1.262742  | 1.758353  | 0.189151  |
| N | 2.319142  | 2.527018  | 0.517051  |
| C | 3.372191  | 1.721360  | 0.474295  |
| C | 2.993127  | 0.407302  | 0.081847  |
| C | 1.609537  | 0.467936  | -0.103558 |
| C | 0.668693  | -0.618029 | -0.474313 |
| H | 0.172423  | -0.437191 | -1.439290 |
| H | -0.130191 | -0.761877 | 0.267664  |
| H | 1.215190  | -1.565696 | -0.546226 |
| C | 4.729938  | 2.241703  | 0.781464  |

|   |           |           |           |
|---|-----------|-----------|-----------|
| H | 5.493948  | 1.772884  | 0.146008  |
| H | 5.023567  | 2.052357  | 1.825619  |
| H | 4.763231  | 3.327553  | 0.629934  |
| C | 3.883570  | -0.746781 | -0.078349 |
| C | 4.891946  | -0.990548 | 0.871111  |
| H | 4.970457  | -0.335645 | 1.742436  |
| C | 5.772613  | -2.058766 | 0.732053  |
| H | 6.545476  | -2.224918 | 1.486627  |
| C | 5.664908  | -2.919970 | -0.359196 |
| H | 6.354930  | -3.759623 | -0.470332 |
| C | 4.671026  | -2.695560 | -1.311520 |
| C | 3.795578  | -1.620122 | -1.177375 |
| H | 3.048322  | -1.432291 | -1.953177 |
| C | -6.353147 | -1.121444 | -0.011506 |
| H | -7.333457 | -0.994385 | -0.477257 |
| H | 4.585501  | -3.356277 | -2.177980 |
| H | -4.751307 | -3.016796 | 2.315014  |

51

troisomer200 SCF Done: -1108.98320549 A.U.

|   |           |           |           |
|---|-----------|-----------|-----------|
| C | -4.490990 | -2.476286 | 1.545271  |
| C | -5.810231 | -2.387639 | 1.102517  |
| H | -6.554549 | -3.112182 | 1.440482  |
| C | -5.222138 | -0.443125 | -0.208364 |
| H | -5.522048 | 0.365498  | -0.879359 |
| C | -3.888571 | -0.514667 | 0.230396  |
| C | -3.541839 | -1.555014 | 1.110988  |
| H | -2.502748 | -1.655544 | 1.436886  |
| C | -2.885625 | 0.451445  | -0.224198 |
| C | -1.864571 | 1.022334  | 0.530050  |
| N | -1.167085 | 1.818227  | -0.331807 |
| N | -1.660014 | 1.799405  | -1.587784 |

|   |           |           |           |
|---|-----------|-----------|-----------|
| C | -2.709341 | 0.987621  | -1.535591 |
| C | -3.508858 | 0.718833  | -2.758814 |
| H | -2.926155 | 0.967451  | -3.653987 |
| H | -4.429304 | 1.321360  | -2.793991 |
| H | -3.814884 | -0.334983 | -2.818804 |
| C | -1.488623 | 0.883662  | 1.955978  |
| H | -0.674738 | 0.154870  | 2.104261  |
| H | -2.345902 | 0.545850  | 2.551777  |
| H | -1.134048 | 1.833873  | 2.380783  |
| C | 0.001120  | 2.587084  | -0.033667 |
| H | 0.180782  | 3.226178  | -0.910650 |
| H | -0.150577 | 3.240562  | 0.837339  |
| N | 1.167967  | 1.776139  | 0.267970  |
| N | 2.146490  | 2.408741  | 0.949018  |
| C | 3.191366  | 1.593702  | 0.908579  |
| C | 2.901531  | 0.427103  | 0.143861  |
| C | 1.581703  | 0.588987  | -0.276645 |
| C | 0.727714  | -0.317877 | -1.083065 |
| H | 0.391748  | 0.142857  | -2.023977 |
| H | -0.182793 | -0.628954 | -0.548057 |
| H | 1.286509  | -1.228117 | -1.329650 |
| C | 4.462006  | 1.962252  | 1.585129  |
| H | 5.337094  | 1.663015  | 0.991516  |
| H | 4.565476  | 1.481617  | 2.570281  |
| H | 4.502734  | 3.045998  | 1.748729  |
| C | 3.806963  | -0.690652 | -0.143988 |
| C | 4.601992  | -1.250582 | 0.871292  |
| H | 4.515451  | -0.863359 | 1.889859  |
| C | 5.476014  | -2.300915 | 0.604695  |
| H | 6.079561  | -2.720934 | 1.413242  |
| C | 5.576134  | -2.822732 | -0.684642 |

|   |           |           |           |
|---|-----------|-----------|-----------|
| H | 6.260375  | -3.648244 | -0.893598 |
| C | 4.799940  | -2.276156 | -1.705906 |
| C | 3.931540  | -1.220366 | -1.440637 |
| H | 3.357020  | -0.775062 | -2.257296 |
| C | -6.169774 | -1.368099 | 0.221689  |
| H | -7.201518 | -1.287496 | -0.129353 |
| H | 4.880702  | -2.666946 | -2.723351 |
| H | -4.194481 | -3.278379 | 2.225594  |

51

trosisomer220 SCF Done: -1108.98629967 A.U.

|   |           |           |           |
|---|-----------|-----------|-----------|
| C | -4.080089 | -2.848351 | 1.160405  |
| C | -5.442231 | -2.775375 | 0.871360  |
| H | -6.105496 | -3.604052 | 1.129494  |
| C | -5.105048 | -0.579284 | -0.082509 |
| H | -5.519678 | 0.317249  | -0.549874 |
| C | -3.729538 | -0.634818 | 0.202299  |
| C | -3.234730 | -1.793736 | 0.826773  |
| H | -2.162764 | -1.877232 | 1.025826  |
| C | -2.833773 | 0.467366  | -0.155568 |
| C | -1.755777 | 0.951101  | 0.582351  |
| N | -1.203745 | 1.940000  | -0.177199 |
| N | -1.836913 | 2.125708  | -1.352960 |
| C | -2.837443 | 1.251962  | -1.348122 |
| C | -3.758476 | 1.163687  | -2.510741 |
| H | -3.292879 | 1.612191  | -3.396710 |
| H | -4.703720 | 1.699873  | -2.334884 |
| H | -4.021138 | 0.121431  | -2.740092 |
| C | -1.212560 | 0.575404  | 1.909246  |
| H | -0.360924 | -0.121027 | 1.829684  |
| H | -1.984106 | 0.087532  | 2.518499  |
| H | -0.840488 | 1.449144  | 2.463232  |

|   |           |           |           |
|---|-----------|-----------|-----------|
| C | -0.027048 | 2.702367  | 0.133400  |
| H | 0.122467  | 3.387413  | -0.714635 |
| H | -0.146486 | 3.302487  | 1.047030  |
| N | 1.124168  | 1.860360  | 0.365089  |
| N | 1.961577  | 2.202199  | 1.365810  |
| C | 2.968742  | 1.340902  | 1.287985  |
| C | 2.796355  | 0.444679  | 0.192983  |
| C | 1.588715  | 0.820908  | -0.392042 |
| C | 0.835643  | 0.241065  | -1.530778 |
| H | 0.554524  | 0.996393  | -2.279466 |
| H | -0.104702 | -0.232029 | -1.204089 |
| H | 1.432941  | -0.531424 | -2.027959 |
| C | 4.095935  | 1.408179  | 2.254084  |
| H | 5.055686  | 1.177327  | 1.771135  |
| H | 3.976411  | 0.693675  | 3.082981  |
| H | 4.157440  | 2.409476  | 2.697539  |
| C | 3.709244  | -0.620383 | -0.236720 |
| C | 4.286498  | -1.498458 | 0.697008  |
| H | 4.024902  | -1.401005 | 1.753937  |
| C | 5.164114  | -2.501507 | 0.293641  |
| H | 5.595127  | -3.174698 | 1.038891  |
| C | 5.484934  | -2.655693 | -1.054451 |
| H | 6.171134  | -3.444537 | -1.371045 |
| C | 4.926839  | -1.789473 | -1.994335 |
| C | 4.056027  | -0.781452 | -1.589823 |
| H | 3.655454  | -0.083386 | -2.329816 |
| C | -5.949218 | -1.636509 | 0.246612  |
| H | -7.015869 | -1.566903 | 0.019367  |
| H | 5.182438  | -1.890997 | -3.052000 |
| H | -3.668585 | -3.740260 | 1.639415  |

trosisomer240 SCF Done: -1108.98629983 A.U.

|   |           |           |           |
|---|-----------|-----------|-----------|
| C | -4.079633 | -2.848586 | 1.160167  |
| C | -5.441828 | -2.775638 | 0.871365  |
| H | -6.105002 | -3.604394 | 1.129481  |
| C | -5.104943 | -0.579372 | -0.082200 |
| H | -5.519690 | 0.317219  | -0.549351 |
| C | -3.729380 | -0.634890 | 0.202342  |
| C | -3.234390 | -1.793870 | 0.826557  |
| H | -2.162385 | -1.877309 | 1.025428  |
| C | -2.833738 | 0.467405  | -0.155511 |
| C | -1.755733 | 0.951184  | 0.582355  |
| N | -1.203800 | 1.940118  | -0.177220 |
| N | -1.837082 | 2.125857  | -1.352914 |
| C | -2.837561 | 1.252053  | -1.348025 |
| C | -3.758734 | 1.163770  | -2.510528 |
| H | -3.293149 | 1.611962  | -3.396662 |
| H | -4.703812 | 1.700247  | -2.334658 |
| H | -4.021696 | 0.121532  | -2.739611 |
| C | -1.212426 | 0.575471  | 1.909206  |
| H | -0.360576 | -0.120690 | 1.829564  |
| H | -1.983840 | 0.087291  | 2.518382  |
| H | -0.840627 | 1.449252  | 2.463313  |
| C | -0.027054 | 2.702459  | 0.133276  |
| H | 0.122462  | 3.387425  | -0.714823 |
| H | -0.146429 | 3.302669  | 1.046855  |
| N | 1.124112  | 1.860418  | 0.365016  |
| N | 1.961556  | 2.202314  | 1.365682  |
| C | 2.968711  | 1.341011  | 1.287864  |
| C | 2.796290  | 0.444740  | 0.192897  |
| C | 1.588643  | 0.820954  | -0.392111 |
| C | 0.835512  | 0.241050  | -1.530776 |

|   |           |           |           |
|---|-----------|-----------|-----------|
| H | 0.554279  | 0.996335  | -2.279463 |
| H | -0.104779 | -0.232090 | -1.203989 |
| H | 1.432820  | -0.531414 | -2.027985 |
| C | 4.095934  | 1.408391  | 2.253921  |
| H | 5.055767  | 1.178165  | 1.770832  |
| H | 3.976784  | 0.693509  | 3.082544  |
| H | 4.157006  | 2.409548  | 2.697749  |
| C | 3.709153  | -0.620366 | -0.236757 |
| C | 4.286414  | -1.498366 | 0.697038  |
| H | 4.024856  | -1.400800 | 1.753964  |
| C | 5.163985  | -2.501484 | 0.293746  |
| H | 5.595000  | -3.174612 | 1.039052  |
| C | 5.484742  | -2.655829 | -1.054342 |
| H | 6.170896  | -3.444735 | -1.370880 |
| C | 4.926636  | -1.789693 | -1.994293 |
| C | 4.055870  | -0.781600 | -1.589858 |
| H | 3.655287  | -0.083610 | -2.329915 |
| C | -5.948997 | -1.636699 | 0.246895  |
| H | -7.015694 | -1.567118 | 0.019858  |
| H | 5.182184  | -1.891338 | -3.051959 |
| H | -3.668002 | -3.740547 | 1.638972  |

51

trosisomer260 SCF Done: -1108.98772935 A.U.

|   |           |           |          |
|---|-----------|-----------|----------|
| C | -5.099373 | 2.366201  | 1.181328 |
| C | -6.317546 | 1.727191  | 1.410086 |
| H | -7.171318 | 2.289571  | 1.795100 |
| C | -5.346723 | -0.352944 | 0.652857 |
| H | -5.459895 | -1.415501 | 0.424937 |
| C | -4.111236 | 0.274645  | 0.413417 |
| C | -4.009892 | 1.649225  | 0.694457 |
| H | -3.051186 | 2.155124  | 0.552746 |

|   |           |           |           |
|---|-----------|-----------|-----------|
| C | -2.969547 | -0.481146 | -0.106582 |
| C | -2.026749 | -0.052609 | -1.039736 |
| N | -1.166092 | -1.098318 | -1.203552 |
| N | -1.475332 | -2.163616 | -0.432580 |
| C | -2.571273 | -1.809600 | 0.228011  |
| C | -3.201497 | -2.750516 | 1.190240  |
| H | -2.476442 | -3.507994 | 1.511887  |
| H | -4.055386 | -3.287130 | 0.748651  |
| H | -3.579869 | -2.226104 | 2.078742  |
| C | -1.900775 | 1.215924  | -1.793865 |
| H | -1.178948 | 1.907878  | -1.333858 |
| H | -2.870989 | 1.726214  | -1.848385 |
| H | -1.542531 | 1.052104  | -2.819685 |
| C | -0.000088 | -1.150054 | -2.048030 |
| H | 0.239837  | -2.212899 | -2.177818 |
| H | -0.219050 | -0.709827 | -3.028685 |
| N | 1.139972  | -0.440386 | -1.529567 |
| N | 1.414921  | 0.793882  | -2.005007 |
| C | 2.494627  | 1.188555  | -1.340035 |
| C | 2.940650  | 0.181408  | -0.433549 |
| C | 2.030947  | -0.862128 | -0.585726 |
| C | 1.923771  | -2.186024 | 0.072389  |
| H | 2.415469  | -2.981116 | -0.512034 |
| H | 0.875196  | -2.486521 | 0.210836  |
| H | 2.409656  | -2.165969 | 1.056328  |
| C | 3.101273  | 2.516718  | -1.617094 |
| H | 4.199247  | 2.469807  | -1.613364 |
| H | 2.812402  | 3.270825  | -0.868648 |
| H | 2.769793  | 2.887729  | -2.594610 |
| C | 4.118165  | 0.206675  | 0.437427  |
| C | 4.493013  | 1.372252  | 1.128732  |



|   |           |           |          |
|---|-----------|-----------|----------|
| H | 3.877626  | 2.270480  | 1.036461 |
| C | 5.617255  | 1.389945  | 1.950319 |
| H | 5.883103  | 2.307124  | 2.481868 |
| C | 6.395237  | 0.243337  | 2.105992 |
| H | 7.276373  | 0.258366  | 2.751491 |
| C | 6.039870  | -0.921353 | 1.426715 |
| C | 4.918741  | -0.938027 | 0.601541 |
| H | 4.670633  | -1.847320 | 0.048018 |
| C | -6.433725 | 0.362895  | 1.146250 |
| H | -7.384228 | -0.148561 | 1.317866 |
| H | 6.648022  | -1.823301 | 1.531335 |
| H | -4.992561 | 3.432668  | 1.394896 |

51

trosisomer280 SCF Done: -1108.98835069 A.U.

|   |          |           |           |
|---|----------|-----------|-----------|
| C | 5.386562 | 2.256410  | -0.779121 |
| C | 6.494940 | 1.529161  | -1.212141 |
| H | 7.402070 | 2.046335  | -1.533323 |
| C | 5.277116 | -0.522108 | -0.823657 |
| H | 5.248830 | -1.614481 | -0.822559 |
| C | 4.151546 | 0.193975  | -0.379935 |
| C | 4.228158 | 1.598094  | -0.373886 |
| H | 3.352935 | 2.179604  | -0.071706 |
| C | 2.938053 | -0.507310 | 0.048398  |
| C | 2.129444 | -0.218696 | 1.145050  |
| N | 1.138345 | -1.156145 | 1.128678  |
| N | 1.230180 | -2.007941 | 0.084914  |
| C | 2.324681 | -1.639670 | -0.568497 |
| C | 2.752813 | -2.369692 | -1.789888 |
| H | 1.902872 | -2.905014 | -2.230455 |
| H | 3.531150 | -3.118358 | -1.576363 |
| H | 3.166632 | -1.686082 | -2.544095 |

|   |           |           |           |
|---|-----------|-----------|-----------|
| C | 2.238529  | 0.806850  | 2.208454  |
| H | 1.411639  | 1.531387  | 2.162985  |
| H | 3.187614  | 1.348572  | 2.121905  |
| H | 2.209755  | 0.356083  | 3.212398  |
| C | -0.016913 | -1.225429 | 1.981622  |
| H | -0.306969 | -2.278725 | 2.071904  |
| H | 0.246572  | -0.840117 | 2.974602  |
| N | -1.141300 | -0.466925 | 1.501954  |
| N | -1.165120 | 0.867427  | 1.707749  |
| C | -2.233735 | 1.301256  | 1.050489  |
| C | -2.917020 | 0.225727  | 0.407680  |
| C | -2.161766 | -0.905067 | 0.709369  |
| C | -2.283754 | -2.318268 | 0.279132  |
| H | -2.673808 | -2.972845 | 1.075520  |
| H | -1.309319 | -2.719911 | -0.036888 |
| H | -2.973162 | -2.397679 | -0.570322 |
| C | -2.602094 | 2.740563  | 1.082802  |
| H | -3.688944 | 2.878345  | 1.170507  |
| H | -2.286770 | 3.270901  | 0.171039  |
| H | -2.116379 | 3.238097  | 1.931066  |
| C | -4.160407 | 0.279699  | -0.363989 |
| C | -4.424216 | 1.338025  | -1.251137 |
| H | -3.674179 | 2.121082  | -1.386625 |
| C | -5.609823 | 1.386489  | -1.979399 |
| H | -5.787240 | 2.216554  | -2.667803 |
| C | -6.562970 | 0.377495  | -1.842743 |
| H | -7.491883 | 0.415125  | -2.416434 |
| C | -6.320416 | -0.677768 | -0.964327 |
| C | -5.137746 | -0.723291 | -0.231440 |
| H | -4.974354 | -1.537218 | 0.480126  |
| C | 6.432225  | 0.136426  | -1.236202 |

|   |           |           |           |
|---|-----------|-----------|-----------|
| H | 7.295027  | -0.444923 | -1.570795 |
| H | -7.065336 | -1.467538 | -0.838807 |
| H | 5.419285  | 3.348667  | -0.768756 |

51

trosisomer300 SCF Done: -1108.98563539 A.U.

|   |           |           |           |
|---|-----------|-----------|-----------|
| C | 5.508006  | -2.267864 | 0.008754  |
| C | 6.586883  | -1.679798 | 0.668479  |
| H | 7.512610  | -2.240020 | 0.819322  |
| C | 5.292538  | 0.342408  | 0.943768  |
| H | 5.222936  | 1.375463  | 1.293308  |
| C | 4.195639  | -0.232271 | 0.277949  |
| C | 4.326058  | -1.556296 | -0.178813 |
| H | 3.473771  | -2.039604 | -0.664022 |
| C | 2.956818  | 0.525047  | 0.081355  |
| C | 2.155343  | 0.563862  | -1.056637 |
| N | 1.129342  | 1.411309  | -0.753866 |
| N | 1.191016  | 1.894247  | 0.506191  |
| C | 2.302194  | 1.382200  | 1.017978  |
| C | 2.708223  | 1.704397  | 2.410706  |
| H | 1.839843  | 2.038777  | 2.991272  |
| H | 3.455853  | 2.511584  | 2.451264  |
| H | 3.152803  | 0.833653  | 2.912688  |
| C | 2.289798  | -0.083167 | -2.382074 |
| H | 1.504563  | -0.838230 | -2.539590 |
| H | 3.268727  | -0.567859 | -2.475835 |
| H | 2.206673  | 0.645569  | -3.202788 |
| C | -0.040019 | 1.696282  | -1.530544 |
| H | -0.362816 | 2.721120  | -1.318669 |
| H | 0.221326  | 1.623407  | -2.595680 |
| N | -1.135019 | 0.798302  | -1.259273 |
| N | -0.955065 | -0.520677 | -1.477329 |

|   |           |           |           |
|---|-----------|-----------|-----------|
| C | -2.028572 | -1.109418 | -0.965161 |
| C | -2.917816 | -0.152324 | -0.392125 |
| C | -2.284863 | 1.073634  | -0.576911 |
| C | -2.630229 | 2.433623  | -0.099546 |
| H | -2.907645 | 3.120524  | -0.914886 |
| H | -1.789637 | 2.887822  | 0.446886  |
| H | -3.482161 | 2.385507  | 0.589137  |
| C | -2.201869 | -2.582195 | -1.059902 |
| H | -3.250358 | -2.852976 | -1.247803 |
| H | -1.900953 | -3.095200 | -0.133566 |
| H | -1.584254 | -2.988943 | -1.869805 |
| C | -4.221562 | -0.389139 | 0.232149  |
| C | -4.430004 | -1.473510 | 1.101715  |
| H | -3.595571 | -2.139922 | 1.333981  |
| C | -5.671856 | -1.691189 | 1.693064  |
| H | -5.805533 | -2.536867 | 2.372178  |
| C | -6.737926 | -0.830709 | 1.431833  |
| H | -7.711107 | -1.001418 | 1.897807  |
| C | -6.551010 | 0.247148  | 0.567590  |
| C | -5.311190 | 0.461648  | -0.028134 |
| H | -5.184428 | 1.289810  | -0.730933 |
| C | 6.470856  | -0.372243 | 1.138966  |
| H | 7.310117  | 0.099879  | 1.655764  |
| H | -7.381947 | 0.921549  | 0.345779  |
| H | 5.582645  | -3.296660 | -0.352627 |

51

troisomer320 SCF Done: -1108.98217620 A.U.

|   |          |           |           |
|---|----------|-----------|-----------|
| C | 5.452533 | -2.354895 | -0.404745 |
| C | 6.645649 | -1.847567 | 0.109038  |
| H | 7.550238 | -2.460064 | 0.110023  |
| C | 5.519141 | 0.229527  | 0.623960  |

|   |           |           |           |
|---|-----------|-----------|-----------|
| H | 5.558797  | 1.251328  | 1.009770  |
| C | 4.309330  | -0.262840 | 0.104269  |
| C | 4.298997  | -1.575141 | -0.401619 |
| H | 3.360024  | -1.995925 | -0.771243 |
| C | 3.092831  | 0.553709  | 0.096329  |
| C | 2.150133  | 0.644255  | -0.921617 |
| N | 1.194837  | 1.505649  | -0.464248 |
| N | 1.437005  | 1.951383  | 0.788905  |
| C | 2.593144  | 1.400765  | 1.132082  |
| C | 3.193140  | 1.676847  | 2.463098  |
| H | 2.427266  | 2.048728  | 3.154378  |
| H | 3.984840  | 2.440319  | 2.413459  |
| H | 3.648278  | 0.774189  | 2.894471  |
| C | 2.095976  | 0.032600  | -2.268600 |
| H | 1.328779  | -0.754697 | -2.319623 |
| H | 3.065446  | -0.408710 | -2.529997 |
| H | 1.853796  | 0.773873  | -3.045267 |
| C | -0.056940 | 1.817694  | -1.071665 |
| H | -0.374675 | 2.809439  | -0.730369 |
| H | 0.081573  | 1.855122  | -2.164294 |
| N | -1.097782 | 0.861281  | -0.744534 |
| N | -0.797318 | -0.448398 | -0.696984 |
| C | -1.928165 | -1.055935 | -0.355496 |
| C | -2.987028 | -0.116773 | -0.189599 |
| C | -2.400404 | 1.123318  | -0.440150 |
| C | -2.948963 | 2.497227  | -0.350534 |
| H | -3.074997 | 2.976419  | -1.334612 |
| H | -2.304974 | 3.155127  | 0.252342  |
| H | -3.934425 | 2.478767  | 0.130285  |
| C | -1.973961 | -2.535082 | -0.220993 |
| H | -2.913607 | -2.948445 | -0.613717 |

|   |           |           |           |
|---|-----------|-----------|-----------|
| H | -1.895361 | -2.859697 | 0.827912  |
| H | -1.137127 | -2.992110 | -0.763019 |
| C | -4.385405 | -0.389116 | 0.151350  |
| C | -4.721748 | -1.354139 | 1.117040  |
| H | -3.923866 | -1.883010 | 1.643840  |
| C | -6.051126 | -1.625290 | 1.429958  |
| H | -6.284493 | -2.377546 | 2.187471  |
| C | -7.080692 | -0.935740 | 0.789929  |
| H | -8.123498 | -1.148425 | 1.036216  |
| C | -6.766411 | 0.024805  | -0.170712 |
| C | -5.437105 | 0.290576  | -0.489386 |
| H | -5.204774 | 1.018590  | -1.271521 |
| C | 6.671013  | -0.553501 | 0.627657  |
| H | 7.600545  | -0.144744 | 1.031853  |
| H | -7.564593 | 0.563330  | -0.687635 |
| H | 5.415986  | -3.373085 | -0.800261 |

51

troisomer340 SCF Done: -1108.97987042 A.U.

|   |          |           |           |
|---|----------|-----------|-----------|
| C | 5.415060 | -2.386741 | -0.701136 |
| C | 6.647684 | -1.909188 | -0.256696 |
| H | 7.541896 | -2.531500 | -0.337622 |
| C | 5.586399 | 0.160134  | 0.402324  |
| H | 5.666150 | 1.168360  | 0.816039  |
| C | 4.335459 | -0.303295 | -0.042199 |
| C | 4.273365 | -1.597363 | -0.590189 |
| H | 3.305866 | -1.998750 | -0.903180 |
| C | 3.136856 | 0.529308  | 0.078743  |
| C | 2.098475 | 0.658616  | -0.837278 |
| N | 1.218402 | 1.539010  | -0.276501 |
| N | 1.595147 | 1.955765  | 0.953117  |
| C | 2.763233 | 1.370534  | 1.171559  |

|   |           |           |           |
|---|-----------|-----------|-----------|
| C | 3.494680  | 1.610762  | 2.442473  |
| H | 2.802109  | 1.966397  | 3.214909  |
| H | 4.280276  | 2.374513  | 2.333890  |
| H | 3.986495  | 0.696808  | 2.803681  |
| C | 1.877104  | 0.051209  | -2.168512 |
| H | 1.150765  | -0.774805 | -2.117289 |
| H | 2.815811  | -0.345284 | -2.574791 |
| H | 1.486626  | 0.780519  | -2.893558 |
| C | -0.070525 | 1.902232  | -0.753609 |
| H | -0.339631 | 2.862830  | -0.296319 |
| H | -0.030272 | 2.042433  | -1.847114 |
| N | -1.094256 | 0.917841  | -0.425884 |
| N | -0.753310 | -0.343303 | -0.113297 |
| C | -1.902327 | -0.964561 | 0.134812  |
| C | -3.011060 | -0.087004 | -0.037643 |
| C | -2.438736 | 1.133788  | -0.396317 |
| C | -3.040904 | 2.463274  | -0.654715 |
| H | -3.040849 | 2.733912  | -1.723262 |
| H | -2.508923 | 3.265554  | -0.121728 |
| H | -4.083487 | 2.482231  | -0.315163 |
| C | -1.908678 | -2.401651 | 0.513481  |
| H | -2.749940 | -2.938655 | 0.053208  |
| H | -1.995393 | -2.543421 | 1.601764  |
| H | -0.972918 | -2.881184 | 0.201489  |
| C | -4.436594 | -0.391369 | 0.105231  |
| C | -4.904213 | -1.222580 | 1.138441  |
| H | -4.192749 | -1.625818 | 1.863010  |
| C | -6.259404 | -1.513862 | 1.268762  |
| H | -6.596768 | -2.158497 | 2.084202  |
| C | -7.185434 | -0.979158 | 0.373099  |
| H | -8.248828 | -1.206289 | 0.477841  |

|   |           |           |           |
|---|-----------|-----------|-----------|
| C | -6.739984 | -0.155790 | -0.660057 |
| C | -5.383991 | 0.128750  | -0.795711 |
| H | -5.044241 | 0.743854  | -1.633423 |
| C | 6.726053  | -0.632606 | 0.299090  |
| H | 7.686571  | -0.246249 | 0.649114  |
| H | -7.453965 | 0.258416  | -1.376336 |
| H | 5.338410  | -3.391203 | -1.125114 |

51

trosSVP SCF Done: -1108.98192241 A.U.

|   |           |           |           |
|---|-----------|-----------|-----------|
| C | -5.577252 | 1.915373  | -1.095021 |
| C | -6.552617 | 1.771015  | -0.108807 |
| H | -7.494877 | 2.318986  | -0.181632 |
| C | -5.111148 | 0.227060  | 1.065630  |
| H | -4.944656 | -0.452359 | 1.904961  |
| C | -4.116408 | 0.358236  | 0.080541  |
| C | -4.372967 | 1.222375  | -0.999015 |
| H | -3.600653 | 1.373404  | -1.758538 |
| C | -2.853161 | -0.375310 | 0.192432  |
| C | -2.145032 | -1.010679 | -0.824937 |
| N | -1.034115 | -1.537758 | -0.228296 |
| N | -0.972518 | -1.284753 | 1.091737  |
| C | -2.068833 | -0.589537 | 1.366163  |
| C | -2.330105 | -0.118567 | 2.751196  |
| H | -1.396408 | -0.102481 | 3.326111  |
| H | -3.029407 | -0.777217 | 3.288726  |
| H | -2.769008 | 0.888888  | 2.761886  |
| C | -2.465062 | -1.195078 | -2.261192 |
| H | -1.841929 | -0.573563 | -2.925333 |
| H | -3.509656 | -0.919676 | -2.451900 |
| H | -2.340880 | -2.238674 | -2.585240 |
| C | 0.040249  | -2.276250 | -0.848008 |



|   |           |           |           |
|---|-----------|-----------|-----------|
| H | 0.058244  | -3.321661 | -0.509984 |
| H | -0.133561 | -2.264025 | -1.935360 |
| N | 1.329136  | -1.739479 | -0.516509 |
| N | 2.233884  | -2.534310 | 0.087734  |
| C | 3.287169  | -1.757808 | 0.306171  |
| C | 3.048359  | -0.423582 | -0.142236 |
| C | 1.760814  | -0.455736 | -0.671405 |
| C | 0.933963  | 0.588485  | -1.319897 |
| H | 0.181752  | 1.013518  | -0.635065 |
| H | 0.387888  | 0.194869  | -2.190695 |
| H | 1.564335  | 1.414425  | -1.673364 |
| C | 4.490981  | -2.307635 | 0.982032  |
| H | 4.913317  | -1.592328 | 1.701659  |
| H | 5.293916  | -2.557626 | 0.271479  |
| H | 4.232072  | -3.229393 | 1.517088  |
| C | 3.938111  | 0.734821  | -0.043627 |
| C | 5.324151  | 0.606213  | -0.244831 |
| H | 5.738030  | -0.371391 | -0.503490 |
| C | 6.170701  | 1.706845  | -0.146282 |
| H | 7.243544  | 1.579505  | -0.311211 |
| C | 5.655651  | 2.968168  | 0.151186  |
| H | 6.320610  | 3.831624  | 0.226020  |
| C | 4.284307  | 3.114622  | 0.357829  |
| C | 3.438366  | 2.012569  | 0.267838  |
| H | 2.371402  | 2.133487  | 0.472987  |
| C | -6.311672 | 0.925152  | 0.973216  |
| H | -7.070358 | 0.800949  | 1.749814  |
| H | 3.869964  | 4.095148  | 0.605760  |
| H | -5.749779 | 2.585171  | -1.941196 |

51

trostrANS SCF Done: -1108.98846668 A.U.

|   |           |           |           |
|---|-----------|-----------|-----------|
| C | 5.317195  | -2.266931 | 0.915405  |
| C | 6.443271  | -1.543903 | 1.308166  |
| H | 7.335685  | -2.064062 | 1.663914  |
| C | 5.280949  | 0.511450  | 0.791917  |
| H | 5.281663  | 1.602217  | 0.725664  |
| C | 4.137493  | -0.200594 | 0.389231  |
| C | 4.177352  | -1.604112 | 0.467395  |
| H | 3.287481  | -2.179574 | 0.198159  |
| C | 2.940288  | 0.504099  | -0.077726 |
| C | 2.119185  | 0.172673  | -1.152765 |
| N | 1.146262  | 1.129185  | -1.182392 |
| N | 1.263216  | 2.035916  | -0.188658 |
| C | 2.354270  | 1.681686  | 0.478144  |
| C | 2.806799  | 2.468132  | 1.654903  |
| H | 1.969525  | 3.034463  | 2.080723  |
| H | 3.589689  | 3.196287  | 1.392453  |
| H | 3.225607  | 1.818069  | 2.435623  |
| C | 2.202476  | -0.908316 | -2.162288 |
| H | 1.355316  | -1.606767 | -2.088026 |
| H | 3.135609  | -1.471165 | -2.044286 |
| H | 2.190641  | -0.507006 | -3.187453 |
| C | -0.013064 | 1.169601  | -2.033033 |
| H | -0.295452 | 2.221430  | -2.160912 |
| H | 0.240731  | 0.744511  | -3.011761 |
| N | -1.138291 | 0.432799  | -1.522260 |
| N | -1.217698 | -0.892610 | -1.769037 |
| C | -2.284667 | -1.307768 | -1.097034 |
| C | -2.913923 | -0.227937 | -0.408549 |
| C | -2.127936 | 0.884763  | -0.698611 |
| C | -2.200614 | 2.292915  | -0.241279 |
| H | -2.626849 | 2.963797  | -1.005072 |

|   |           |           |           |
|---|-----------|-----------|-----------|
| H | -1.202676 | 2.675501  | 0.019793  |
| H | -2.838604 | 2.370708  | 0.647882  |
| C | -2.704838 | -2.731700 | -1.161291 |
| H | -3.797544 | -2.828492 | -1.229199 |
| H | -2.389746 | -3.298954 | -0.271947 |
| H | -2.255003 | -3.221126 | -2.033762 |
| C | -4.141372 | -0.259844 | 0.389422  |
| C | -4.424228 | -1.332385 | 1.253211  |
| H | -3.699276 | -2.144008 | 1.352367  |
| C | -5.596270 | -1.360319 | 2.004270  |
| H | -5.789060 | -2.202519 | 2.673523  |
| C | -6.516383 | -0.316275 | 1.913846  |
| H | -7.434841 | -0.338095 | 2.504883  |
| C | -6.254108 | 0.754388  | 1.059984  |
| C | -5.085040 | 0.779807  | 0.304593  |
| H | -4.906739 | 1.607403  | -0.387348 |
| C | 6.417618  | -0.151139 | 1.247113  |
| H | 7.294837  | 0.426410  | 1.549165  |
| H | -6.973324 | 1.572511  | 0.971354  |
| H | 5.321193  | -3.358330 | 0.970550  |

51

troTSscis SCF Done: -1108.97793840 A.U.

|   |          |           |           |
|---|----------|-----------|-----------|
| C | 5.118913 | 2.698490  | -0.640045 |
| C | 6.373193 | 2.137977  | -0.878957 |
| H | 7.224467 | 2.776034  | -1.126784 |
| C | 5.443864 | -0.058261 | -0.484872 |
| H | 5.586714 | -1.137992 | -0.402521 |
| C | 4.171069 | 0.487964  | -0.238282 |
| C | 4.031984 | 1.885080  | -0.329682 |
| H | 3.047261 | 2.336703  | -0.184232 |
| C | 3.038518 | -0.376939 | 0.098034  |

|   |           |           |           |
|---|-----------|-----------|-----------|
| C | 2.016672  | -0.120114 | 1.009194  |
| N | 1.214307  | -1.228895 | 0.990701  |
| N | 1.644682  | -2.171521 | 0.129459  |
| C | 2.747269  | -1.677424 | -0.413697 |
| C | 3.488157  | -2.460297 | -1.437302 |
| H | 2.824924  | -3.208336 | -1.887806 |
| H | 4.345351  | -3.002875 | -1.009544 |
| H | 3.883462  | -1.814375 | -2.233854 |
| C | 1.801461  | 1.038593  | 1.908166  |
| H | 1.131349  | 1.799699  | 1.477814  |
| H | 2.757242  | 1.538808  | 2.113330  |
| H | 1.374322  | 0.744369  | 2.877779  |
| C | -0.000021 | -1.486030 | 1.723240  |
| H | 0.000016  | -2.548370 | 1.993194  |
| H | 0.000065  | -0.881802 | 2.637907  |
| N | -1.214505 | -1.229001 | 0.990942  |
| N | -1.645339 | -2.171917 | 0.130241  |
| C | -2.747874 | -1.677733 | -0.412944 |
| C | -3.038616 | -0.376903 | 0.098204  |
| C | -2.016505 | -0.119952 | 1.009026  |
| C | -1.800641 | 1.039135  | 1.907341  |
| H | -1.130356 | 1.799751  | 1.476388  |
| H | -1.373331 | 0.745253  | 2.876983  |
| H | -2.756168 | 1.539822  | 2.112531  |
| C | -3.489188 | -2.460858 | -1.436050 |
| H | -3.884565 | -1.815154 | -2.232743 |
| H | -4.346383 | -3.003102 | -1.007868 |
| H | -2.826224 | -3.209201 | -1.886442 |
| C | -4.170976 | 0.488183  | -0.238296 |
| C | -5.443952 | -0.057797 | -0.484502 |
| H | -5.587081 | -1.137458 | -0.401726 |

|   |           |          |           |
|---|-----------|----------|-----------|
| C | -6.527918 | 0.754778 | -0.802868 |
| H | -7.506425 | 0.302884 | -0.983430 |
| C | -6.372770 | 2.138539 | -0.879253 |
| H | -7.223915 | 2.776728 | -1.127183 |
| C | -5.118306 | 2.698810 | -0.640733 |
| C | -4.031540 | 1.885230 | -0.330242 |
| H | -3.046682 | 2.336660 | -0.185119 |
| C | 6.527994  | 0.754148 | -0.803097 |
| H | 7.506360  | 0.302067 | -0.983960 |
| H | -4.980975 | 3.780883 | -0.708761 |
| H | 4.981855  | 3.780623 | -0.707658 |

243

cat1+H2O

|    |           |           |           |
|----|-----------|-----------|-----------|
| Cu | 1.668414  | -5.772602 | -1.915187 |
| C  | 0.406564  | 4.201669  | 2.994302  |
| Cu | -1.066037 | 3.603136  | 0.665112  |
| O  | 3.233135  | -4.829771 | -2.665125 |
| C  | 3.277565  | -3.565515 | -2.678450 |
| O  | 2.479552  | -2.778263 | -2.108352 |
| C  | 4.409530  | -2.970188 | -3.457842 |
| O  | 0.166925  | 4.751857  | -0.481352 |
| C  | 5.059841  | -3.734827 | -4.434012 |
| H  | 4.740956  | -4.764672 | -4.600330 |
| O  | 0.074843  | 6.458410  | 0.985047  |
| C  | 6.516006  | -1.871647 | -4.915348 |
| H  | 7.361402  | -1.452703 | -5.468099 |
| C  | 5.894718  | -1.092820 | -3.923086 |
| C  | 4.824486  | -1.658989 | -3.213253 |
| H  | 4.292477  | -1.071989 | -2.461617 |
| C  | 6.369019  | 0.260897  | -3.628174 |
| C  | 6.701327  | 1.256613  | -4.539593 |

|   |          |           |           |
|---|----------|-----------|-----------|
| N | 7.168568 | 2.298462  | -3.792620 |
| N | 7.127211 | 2.057430  | -2.462945 |
| C | 6.644546 | 0.827094  | -2.347698 |
| C | 6.476883 | 0.188952  | -1.017649 |
| H | 7.059175 | 0.710764  | -0.247411 |
| H | 6.780097 | -0.867790 | -1.041875 |
| H | 5.426404 | 0.206656  | -0.686111 |
| C | 6.557437 | 1.324532  | -6.012706 |
| H | 5.984593 | 2.216692  | -6.307233 |
| H | 6.018983 | 0.443079  | -6.381058 |
| H | 7.527502 | 1.358406  | -6.533475 |
| C | 7.383908 | 3.652426  | -4.230336 |
| H | 8.231982 | 4.073565  | -3.676551 |
| H | 7.621604 | 3.648970  | -5.300945 |
| N | 6.224409 | 4.472973  | -4.013148 |
| N | 5.155040 | 4.284309  | -4.819919 |
| C | 4.145932 | 4.890202  | -4.208146 |
| C | 4.570015 | 5.478960  | -2.979994 |
| C | 5.919826 | 5.169071  | -2.878355 |
| C | 6.904248 | 5.428391  | -1.801497 |
| H | 7.700674 | 6.121430  | -2.115762 |
| H | 7.381658 | 4.493730  | -1.470609 |
| H | 6.405428 | 5.877307  | -0.933712 |
| C | 2.790207 | 4.925078  | -4.814610 |
| H | 2.324560 | 5.914860  | -4.709261 |
| H | 2.108840 | 4.204457  | -4.337933 |
| H | 2.840672 | 4.672789  | -5.880293 |
| C | 3.772371 | 6.242315  | -2.016854 |
| C | 4.220917 | 7.481879  | -1.530006 |
| H | 5.159554 | 7.893957  | -1.911160 |
| C | 3.479481 | 8.193949  | -0.589832 |

|   |           |           |           |
|---|-----------|-----------|-----------|
| H | 3.841955  | 9.159975  | -0.230539 |
| C | 2.281460  | 7.677934  | -0.107584 |
| H | 1.693883  | 8.214728  | 0.638246  |
| C | 1.817883  | 6.441840  | -0.576632 |
| C | 2.555076  | 5.740982  | -1.534055 |
| H | 2.184240  | 4.770160  | -1.869409 |
| C | 0.580429  | 5.834473  | 0.006492  |
| C | 6.097522  | -3.174671 | -5.171992 |
| H | 6.602619  | -3.765994 | -5.939358 |
| O | 2.650628  | -6.100664 | -0.179863 |
| C | 3.019211  | -5.123247 | 0.521316  |
| O | 2.633623  | -3.923637 | 0.403533  |
| C | 4.028823  | -5.385889 | 1.594577  |
| O | 0.418940  | 3.487581  | 1.951685  |
| C | 4.387934  | -6.694228 | 1.936849  |
| H | 3.918922  | -7.528392 | 1.412805  |
| O | -0.458608 | 5.063272  | 3.301148  |
| C | 5.938077  | -5.822826 | 3.579640  |
| H | 6.702701  | -6.005031 | 4.338943  |
| C | 5.606940  | -4.500401 | 3.235552  |
| C | 4.626129  | -4.308063 | 2.251707  |
| H | 4.302178  | -3.300152 | 1.988842  |
| C | 6.256482  | -3.345598 | 3.858962  |
| C | 6.624174  | -2.164038 | 3.218318  |
| N | 7.165888  | -1.370131 | 4.185212  |
| N | 7.163920  | -1.950634 | 5.406632  |
| C | 6.628987  | -3.152549 | 5.220660  |
| C | 6.461621  | -4.088367 | 6.362811  |
| H | 6.489720  | -3.541375 | 7.312847  |
| H | 7.261454  | -4.843958 | 6.399827  |
| H | 5.509805  | -4.634163 | 6.300088  |

|   |          |           |          |
|---|----------|-----------|----------|
| C | 6.536640 | -1.752432 | 1.799288 |
| H | 5.642774 | -1.142062 | 1.594947 |
| H | 6.493724 | -2.633190 | 1.145057 |
| H | 7.394337 | -1.136183 | 1.496844 |
| C | 7.677760 | -0.029221 | 4.041432 |
| H | 8.190381 | 0.200544  | 4.983994 |
| H | 8.402311 | 0.026506  | 3.218151 |
| N | 6.668227 | 0.958316  | 3.755803 |
| N | 6.511324 | 1.398418  | 2.487084 |
| C | 5.462843 | 2.213242  | 2.526175 |
| C | 4.935759 | 2.308185  | 3.851066 |
| C | 5.746319 | 1.474420  | 4.618321 |
| C | 5.717606 | 1.119277  | 6.057489 |
| H | 6.375140 | 1.769389  | 6.657540 |
| H | 6.042672 | 0.083624  | 6.231332 |
| H | 4.702796 | 1.231356  | 6.460382 |
| C | 5.008927 | 2.912910  | 1.292990 |
| H | 4.696487 | 3.946338  | 1.502561 |
| H | 4.142659 | 2.418514  | 0.824940 |
| H | 5.809668 | 2.934460  | 0.542309 |
| C | 3.797498 | 3.104126  | 4.314100 |
| C | 3.794434 | 3.734797  | 5.572111 |
| H | 4.675244 | 3.657860  | 6.214352 |
| C | 2.699572 | 4.484310  | 5.998260 |
| H | 2.723264 | 4.963611  | 6.979834 |
| C | 1.586796 | 4.641204  | 5.176311 |
| H | 0.725089 | 5.232975  | 5.490665 |
| C | 1.569223 | 4.024293  | 3.920382 |
| C | 2.662908 | 3.260787  | 3.505317 |
| H | 2.610083 | 2.777528  | 2.529628 |
| C | 5.329928 | -6.902408 | 2.941307 |



|    |           |           |           |
|----|-----------|-----------|-----------|
| H  | 5.609218  | -7.921053 | 3.220503  |
| O  | 2.162677  | -7.526356 | -3.239028 |
| O  | -0.821841 | 1.497775  | -0.097290 |
| Cu | -1.621198 | 5.835222  | 1.781843  |
| C  | -0.330304 | -4.202303 | -3.167040 |
| Cu | 1.113770  | -3.546070 | -0.793965 |
| O  | -3.192735 | 4.925151  | 2.510774  |
| C  | -3.233666 | 3.662876  | 2.549758  |
| O  | -2.421463 | 2.865392  | 2.010723  |
| C  | -4.386277 | 3.082150  | 3.308823  |
| O  | -0.119653 | -4.692783 | 0.344142  |
| C  | -5.097173 | 3.881788  | 4.212024  |
| H  | -4.797505 | 4.921661  | 4.347600  |
| O  | -0.018819 | -6.394402 | -1.130292 |
| C  | -6.552766 | 2.017496  | 4.700465  |
| H  | -7.422847 | 1.612768  | 5.224552  |
| C  | -5.862067 | 1.200843  | 3.788129  |
| C  | -4.764218 | 1.752410  | 3.109850  |
| H  | -4.181153 | 1.138304  | 2.420258  |
| C  | -6.286505 | -0.176933 | 3.530160  |
| C  | -6.653986 | -1.144143 | 4.460381  |
| N  | -7.024107 | -2.234617 | 3.724664  |
| N  | -6.897838 | -2.044532 | 2.391919  |
| C  | -6.448677 | -0.803755 | 2.259373  |
| C  | -6.206510 | -0.215251 | 0.917533  |
| H  | -6.798805 | -0.720084 | 0.143165  |
| H  | -6.445715 | 0.857544  | 0.906772  |
| H  | -5.150381 | -0.307584 | 0.616033  |
| C  | -6.664697 | -1.115763 | 5.941551  |
| H  | -6.103066 | -1.948027 | 6.395243  |
| H  | -6.195709 | -0.191766 | 6.299825  |

|   |           |           |           |
|---|-----------|-----------|-----------|
| H | -7.687761 | -1.139981 | 6.349994  |
| C | -7.252755 | -3.577333 | 4.186890  |
| H | -8.125536 | -3.997604 | 3.670373  |
| H | -7.451819 | -3.552811 | 5.265390  |
| N | -6.118047 | -4.428585 | 3.941831  |
| N | -5.027305 | -4.276131 | 4.726048  |
| C | -4.035036 | -4.888838 | 4.093207  |
| C | -4.491782 | -5.444895 | 2.864055  |
| C | -5.838728 | -5.110303 | 2.791690  |
| C | -6.843213 | -5.343038 | 1.728043  |
| H | -7.645479 | -6.025330 | 2.050201  |
| H | -7.306565 | -4.396369 | 1.413343  |
| H | -6.364447 | -5.793319 | 0.849967  |
| C | -2.680358 | -4.956118 | 4.698722  |
| H | -2.252457 | -5.965280 | 4.620961  |
| H | -1.975325 | -4.276143 | 4.198629  |
| H | -2.722033 | -4.666279 | 5.756103  |
| C | -3.716087 | -6.194723 | 1.871988  |
| C | -4.183497 | -7.414751 | 1.355427  |
| H | -5.123826 | -7.826988 | 1.732447  |
| C | -3.458066 | -8.107676 | 0.388571  |
| H | -3.835779 | -9.057594 | 0.003136  |
| C | -2.256542 | -7.593779 | -0.088113 |
| H | -1.681516 | -8.112126 | -0.856219 |
| C | -1.774868 | -6.378011 | 0.413991  |
| C | -2.497342 | -5.693783 | 1.393992  |
| H | -2.112805 | -4.736491 | 1.751802  |
| C | -0.529490 | -5.772815 | -0.155504 |
| C | -6.167387 | 3.338448  | 4.915641  |
| H | -6.723085 | 3.956999  | 5.624289  |
| O | -2.603432 | 6.180184  | 0.045659  |

|   |           |           |           |
|---|-----------|-----------|-----------|
| C | -2.983917 | 5.194743  | -0.636755 |
| O | -2.599996 | 3.995440  | -0.505143 |
| C | -4.006821 | 5.441401  | -1.701023 |
| O | -0.348025 | -3.503949 | -2.113858 |
| C | -4.391462 | 6.743815  | -2.037811 |
| H | -3.930434 | 7.585003  | -1.517986 |
| O | 0.542906  | -5.051551 | -3.485321 |
| C | -5.948776 | 5.848190  | -3.660395 |
| H | -6.727349 | 6.018560  | -4.408137 |
| C | -5.590960 | 4.530982  | -3.322708 |
| C | -4.594326 | 4.354193  | -2.351998 |
| H | -4.250796 | 3.351439  | -2.093977 |
| C | -6.231154 | 3.367209  | -3.939338 |
| C | -6.572160 | 2.177839  | -3.298040 |
| N | -7.116988 | 1.379962  | -4.259819 |
| N | -7.142606 | 1.965148  | -5.478609 |
| C | -6.622022 | 3.173820  | -5.295933 |
| C | -6.485795 | 4.115943  | -6.437121 |
| H | -6.516747 | 3.571347  | -7.388484 |
| H | -7.299170 | 4.857465  | -6.461648 |
| H | -5.543035 | 4.678314  | -6.384820 |
| C | -6.456869 | 1.758411  | -1.883370 |
| H | -5.565990 | 1.135839  | -1.704430 |
| H | -6.390047 | 2.634516  | -1.225060 |
| H | -7.314320 | 1.149839  | -1.564133 |
| C | -7.612661 | 0.033345  | -4.111944 |
| H | -8.138517 | -0.198113 | -5.046860 |
| H | -8.323024 | -0.032153 | -3.277089 |
| N | -6.589729 | -0.945807 | -3.846188 |
| N | -6.418618 | -1.402418 | -2.584991 |
| C | -5.369075 | -2.214796 | -2.646065 |

|   |           |           |           |
|---|-----------|-----------|-----------|
| C | -4.855352 | -2.289972 | -3.977460 |
| C | -5.676415 | -1.449477 | -4.725233 |
| C | -5.666691 | -1.081144 | -6.161263 |
| H | -6.332533 | -1.725893 | -6.757999 |
| H | -5.994295 | -0.044202 | -6.322033 |
| H | -4.657389 | -1.190631 | -6.578490 |
| C | -4.904528 | -2.938351 | -1.430485 |
| H | -4.610024 | -3.972414 | -1.662436 |
| H | -4.023754 | -2.465171 | -0.968222 |
| H | -5.693643 | -2.962105 | -0.667653 |
| C | -3.722014 | -3.081419 | -4.459898 |
| C | -3.733971 | -3.708616 | -5.719384 |
| H | -4.620677 | -3.626407 | -6.352952 |
| C | -2.647933 | -4.465400 | -6.155379 |
| H | -2.685060 | -4.947213 | -7.135304 |
| C | -1.530201 | -4.632322 | -5.342292 |
| H | -0.681949 | -5.241008 | -5.659579 |
| C | -1.495566 | -4.014521 | -4.087582 |
| C | -2.579976 | -3.242939 | -3.663240 |
| H | -2.514709 | -2.759253 | -2.688514 |
| C | -5.350120 | 6.937220  | -3.029283 |
| H | -5.650802 | 7.951250  | -3.302997 |
| O | -1.647976 | 7.734974  | 2.992406  |
| O | 0.719336  | -1.474992 | -0.014657 |
| C | 2.410961  | -7.244833 | -4.383801 |
| H | 2.654947  | -8.036783 | -5.131907 |
| H | 2.408182  | -6.192029 | -4.749329 |
| C | 1.635387  | -0.732531 | 0.240690  |
| H | 1.452031  | 0.328776  | 0.525181  |
| H | 2.697268  | -1.076091 | 0.202069  |
| C | -1.816237 | 0.831473  | -0.249379 |

|   |           |           |           |
|---|-----------|-----------|-----------|
| H | -2.837024 | 1.272352  | -0.151303 |
| H | -1.747600 | -0.253989 | -0.493281 |
| C | -0.594597 | 8.054965  | 3.482824  |
| H | -0.513826 | 8.962525  | 4.128092  |
| H | 0.339371  | 7.469261  | 3.319686  |
| H | -4.789520 | -3.706852 | 6.514093  |
| O | -4.645272 | -3.428891 | 7.441493  |
| H | -5.081998 | -4.124921 | 7.942343  |

227

cat1senseAXIAL+H2O

|    |           |           |           |
|----|-----------|-----------|-----------|
| Cu | 2.372023  | 5.307747  | 2.654869  |
| C  | 0.146011  | -3.892347 | -3.519194 |
| Cu | -1.506804 | -3.406669 | -1.292782 |
| O  | 3.680721  | 4.075980  | 3.438474  |
| C  | 3.543578  | 2.830154  | 3.267790  |
| O  | 2.728044  | 2.262039  | 2.491333  |
| C  | 4.449090  | 1.958861  | 4.077727  |
| O  | -0.577815 | -4.807204 | -0.192625 |
| C  | 5.057507  | 2.477245  | 5.227390  |
| H  | 4.870278  | 3.514883  | 5.505997  |
| O  | -0.758256 | -6.331158 | -1.844768 |
| C  | 6.127383  | 0.346179  | 5.601828  |
| H  | 6.810817  | -0.275554 | 6.186651  |
| C  | 5.539968  | -0.189563 | 4.441342  |
| C  | 4.686114  | 0.636382  | 3.693752  |
| H  | 4.182578  | 0.249158  | 2.805688  |
| C  | 5.823721  | -1.564702 | 4.025972  |
| C  | 5.870698  | -2.694258 | 4.836250  |
| N  | 6.250007  | -3.718148 | 4.018733  |
| N  | 6.420081  | -3.335264 | 2.733115  |
| C  | 6.163251  | -2.033115 | 2.721170  |

|   |          |           |           |
|---|----------|-----------|-----------|
| C | 6.275041 | -1.238249 | 1.471482  |
| H | 6.868342 | -1.765845 | 0.713859  |
| H | 6.735380 | -0.258464 | 1.664315  |
| H | 5.289465 | -1.039301 | 1.021790  |
| C | 5.533165 | -2.890521 | 6.265789  |
| H | 4.815297 | -3.715480 | 6.386925  |
| H | 5.072505 | -1.982692 | 6.673624  |
| H | 6.416274 | -3.116322 | 6.884553  |
| C | 6.222609 | -5.125377 | 4.318393  |
| H | 7.058756 | -5.612931 | 3.802424  |
| H | 6.342987 | -5.260987 | 5.400132  |
| N | 4.991654 | -5.744577 | 3.907622  |
| N | 3.876170 | -5.476181 | 4.623761  |
| C | 2.868180 | -5.885870 | 3.865108  |
| C | 3.340743 | -6.427828 | 2.633078  |
| C | 4.722727 | -6.301438 | 2.690252  |
| C | 5.775285 | -6.614480 | 1.695706  |
| H | 6.444928 | -7.421845 | 2.031499  |
| H | 6.394679 | -5.730015 | 1.484614  |
| H | 5.318817 | -6.940928 | 0.753281  |
| C | 1.462543 | -5.779711 | 4.334064  |
| H | 0.884805 | -6.682231 | 4.090712  |
| H | 0.937428 | -4.933175 | 3.866626  |
| H | 1.431151 | -5.625160 | 5.418961  |
| C | 2.555858 | -6.978557 | 1.524448  |
| C | 2.869911 | -8.225203 | 0.956500  |
| H | 3.687573 | -8.812243 | 1.384198  |
| C | 2.147692 | -8.723851 | -0.125889 |
| H | 2.405641 | -9.697492 | -0.548865 |
| C | 1.103815 | -7.985073 | -0.672524 |
| H | 0.541364 | -8.349058 | -1.532943 |

|   |           |           |           |
|---|-----------|-----------|-----------|
| C | 0.774828  | -6.740446 | -0.120124 |
| C | 1.488314  | -6.252633 | 0.977865  |
| H | 1.230016  | -5.269191 | 1.375509  |
| C | -0.278797 | -5.894595 | -0.758557 |
| C | 5.882554  | 1.659926  | 5.993058  |
| H | 6.357104  | 2.055729  | 6.893928  |
| O | 3.676631  | 5.779489  | 1.194493  |
| C | 3.980423  | 4.863185  | 0.383997  |
| O | 3.402795  | 3.742813  | 0.267379  |
| C | 5.142158  | 5.085389  | -0.529240 |
| O | 0.122766  | -3.324385 | -2.388760 |
| C | 5.766428  | 6.333971  | -0.622798 |
| H | 5.400593  | 7.162015  | -0.013642 |
| O | -0.763861 | -4.615663 | -4.009738 |
| C | 7.306478  | 5.419120  | -2.254164 |
| H | 8.169317  | 5.556614  | -2.910796 |
| C | 6.705161  | 4.151607  | -2.157973 |
| C | 5.605249  | 4.016358  | -1.299874 |
| H | 5.078665  | 3.064013  | -1.231195 |
| C | 7.184070  | 2.989223  | -2.908558 |
| C | 7.249616  | 1.678843  | -2.437510 |
| N | 7.705066  | 0.932245  | -3.482493 |
| N | 7.930700  | 1.664640  | -4.597032 |
| C | 7.629253  | 2.913930  | -4.259731 |
| C | 7.752451  | 4.015280  | -5.249756 |
| H | 7.759305  | 3.614028  | -6.270265 |
| H | 8.684599  | 4.586403  | -5.119284 |
| H | 6.923974  | 4.731902  | -5.160411 |
| C | 6.954160  | 1.098568  | -1.108081 |
| H | 5.947500  | 0.655094  | -1.060221 |
| H | 7.014099  | 1.869565  | -0.328995 |

|    |           |           |           |
|----|-----------|-----------|-----------|
| H  | 7.650482  | 0.288677  | -0.849837 |
| C  | 7.956564  | -0.488185 | -3.508149 |
| H  | 8.488889  | -0.681567 | -4.448003 |
| H  | 8.598254  | -0.784586 | -2.667535 |
| N  | 6.774015  | -1.305886 | -3.414910 |
| N  | 6.467241  | -1.894510 | -2.236951 |
| C  | 5.325390  | -2.537155 | -2.453504 |
| C  | 4.890537  | -2.371265 | -3.804223 |
| C  | 5.859574  | -1.561737 | -4.394050 |
| C  | 5.990042  | -1.010568 | -5.764337 |
| H  | 6.609473  | -1.651917 | -6.412549 |
| H  | 6.453694  | -0.013818 | -5.763035 |
| H  | 5.004924  | -0.929191 | -6.241415 |
| C  | 4.694176  | -3.333169 | -1.366510 |
| H  | 4.278341  | -4.277656 | -1.745657 |
| H  | 3.862966  | -2.797241 | -0.882118 |
| H  | 5.428108  | -3.562489 | -0.583804 |
| C  | 3.711589  | -2.958247 | -4.444863 |
| C  | 3.749443  | -3.418574 | -5.774324 |
| H  | 4.681627  | -3.347041 | -6.340220 |
| C  | 2.631910  | -4.001246 | -6.368312 |
| H  | 2.691604  | -4.355613 | -7.399973 |
| C  | 1.451799  | -4.160836 | -5.648047 |
| H  | 0.575247  | -4.637495 | -6.088900 |
| C  | 1.390224  | -3.705441 | -4.326109 |
| C  | 2.506616  | -3.101346 | -3.740589 |
| H  | 2.419799  | -2.737175 | -2.716347 |
| C  | 6.837463  | 6.493525  | -1.499229 |
| H  | 7.326753  | 7.466507  | -1.585164 |
| Cu | -2.172489 | -5.312207 | -2.748830 |
| C  | 0.043577  | 3.852271  | 3.386971  |



|    |           |           |           |
|----|-----------|-----------|-----------|
| Cu | 1.717179  | 3.403943  | 1.190676  |
| O  | -3.474172 | -4.066805 | -3.524868 |
| C  | -3.331673 | -2.820263 | -3.360699 |
| O  | -2.515263 | -2.251958 | -2.585959 |
| C  | -4.234472 | -1.948593 | -4.173313 |
| O  | 0.783734  | 4.812964  | 0.101883  |
| C  | -4.839606 | -2.466681 | -5.324829 |
| H  | -4.652818 | -3.504722 | -5.602232 |
| O  | 0.954018  | 6.331063  | 1.760307  |
| C  | -5.905655 | -0.334409 | -5.703447 |
| H  | -6.586190 | 0.288272  | -6.290659 |
| C  | -5.322862 | 0.200434  | -4.540189 |
| C  | -4.471677 | -0.625908 | -3.789989 |
| H  | -3.971976 | -0.238719 | -2.899700 |
| C  | -5.612908 | 1.573827  | -4.122694 |
| C  | -5.666225 | 2.704892  | -4.930766 |
| N  | -6.055729 | 3.723515  | -4.111975 |
| N  | -6.225117 | 3.337402  | -2.827726 |
| C  | -5.961240 | 2.036823  | -2.818510 |
| C  | -6.073923 | 1.240815  | -1.570402 |
| H  | -6.680232 | 1.763198  | -0.819305 |
| H  | -6.520700 | 0.255641  | -1.767803 |
| H  | -5.089474 | 1.054415  | -1.112712 |
| C  | -5.325367 | 2.908085  | -6.358556 |
| H  | -4.610198 | 3.736337  | -6.474073 |
| H  | -4.860978 | 2.003624  | -6.769529 |
| H  | -6.207562 | 3.134559  | -6.978395 |
| C  | -6.038380 | 5.132331  | -4.405144 |
| H  | -6.880544 | 5.610504  | -3.890176 |
| H  | -6.154150 | 5.273758  | -5.486551 |
| N  | -4.813696 | 5.756137  | -3.985022 |

|   |           |           |           |
|---|-----------|-----------|-----------|
| N | -3.696282 | 5.511928  | -4.707109 |
| C | -2.691466 | 5.912563  | -3.939607 |
| C | -3.168267 | 6.423396  | -2.695589 |
| C | -4.548956 | 6.287683  | -2.755209 |
| C | -5.602964 | 6.563839  | -1.751056 |
| H | -6.270062 | 7.386281  | -2.054201 |
| H | -6.223936 | 5.672116  | -1.578082 |
| H | -5.148065 | 6.848715  | -0.794316 |
| C | -1.285585 | 5.830415  | -4.412447 |
| H | -0.721669 | 6.741076  | -4.166469 |
| H | -0.745028 | 4.990840  | -3.950269 |
| H | -1.255429 | 5.681830  | -5.498179 |
| C | -2.388390 | 6.964042  | -1.579511 |
| C | -2.725213 | 8.192599  | -0.985654 |
| H | -3.557386 | 8.770562  | -1.397472 |
| C | -2.006555 | 8.686262  | 0.101063  |
| H | -2.282090 | 9.646146  | 0.543941  |
| C | -0.943787 | 7.959473  | 0.626605  |
| H | -0.383256 | 8.318733  | 1.490225  |
| C | -0.593747 | 6.731520  | 0.050089  |
| C | -1.304087 | 6.248797  | -1.051958 |
| H | -1.028377 | 5.277864  | -1.468206 |
| C | 0.475386  | 5.894727  | 0.674373  |
| C | -5.660448 | -1.648311 | -6.094006 |
| H | -6.132145 | -2.043708 | -6.996540 |
| O | -3.477940 | -5.765644 | -1.289219 |
| C | -3.783701 | -4.845538 | -0.483635 |
| O | -3.195943 | -3.731641 | -0.358085 |
| C | -4.977552 | -5.054879 | 0.391252  |
| O | 0.074688  | 3.285505  | 2.256422  |
| C | -5.658501 | -6.276971 | 0.401431  |

|   |           |           |           |
|---|-----------|-----------|-----------|
| H | -5.294991 | -7.096486 | -0.220246 |
| O | 0.951510  | 4.572131  | 3.886997  |
| C | -7.260136 | -5.348573 | 1.961848  |
| H | -8.174842 | -5.468262 | 2.546988  |
| C | -6.597734 | -4.107591 | 1.954911  |
| C | -5.434429 | -3.996058 | 1.179885  |
| H | -4.857391 | -3.071284 | 1.182895  |
| C | -7.102565 | -2.949890 | 2.695102  |
| C | -7.034220 | -1.615879 | 2.283280  |
| N | -7.622052 | -0.889431 | 3.269687  |
| N | -8.066784 | -1.656800 | 4.287556  |
| C | -7.766543 | -2.909323 | 3.953353  |
| C | -8.103546 | -4.031666 | 4.866217  |
| H | -8.263219 | -3.664676 | 5.887960  |
| H | -9.024658 | -4.551060 | 4.560560  |
| H | -7.304353 | -4.785679 | 4.889657  |
| C | -6.524073 | -0.989805 | 1.042363  |
| H | -5.490096 | -0.624364 | 1.149521  |
| H | -6.533758 | -1.709217 | 0.213450  |
| H | -7.125577 | -0.117030 | 0.754690  |
| C | -7.820553 | 0.544387  | 3.335388  |
| H | -8.312481 | 0.727126  | 4.302736  |
| H | -8.475069 | 0.887652  | 2.521863  |
| N | -6.607264 | 1.307303  | 3.221248  |
| N | -6.380030 | 2.038459  | 2.104435  |
| C | -5.230692 | 2.665237  | 2.328014  |
| C | -4.715248 | 2.350734  | 3.623409  |
| C | -5.636396 | 1.459031  | 4.168488  |
| C | -5.652895 | 0.707515  | 5.446136  |
| H | -6.506359 | 0.970519  | 6.090861  |
| H | -5.721297 | -0.376763 | 5.268979  |

|   |           |           |          |
|---|-----------|-----------|----------|
| H | -4.729216 | 0.886317  | 6.009059 |
| C | -4.658538 | 3.579754  | 1.302603 |
| H | -4.223682 | 4.480510  | 1.759961 |
| H | -3.852198 | 3.105135  | 0.722049 |
| H | -5.431228 | 3.887493  | 0.586748 |
| C | -3.526793 | 2.907872  | 4.276696 |
| C | -3.561039 | 3.313735  | 5.623978 |
| H | -4.492864 | 3.217049  | 6.187361 |
| C | -2.441816 | 3.871515  | 6.238042 |
| H | -2.498902 | 4.184657  | 7.283039 |
| C | -1.263019 | 4.057006  | 5.521586 |
| H | -0.383490 | 4.512935  | 5.978462 |
| C | -1.205353 | 3.654602  | 4.182873 |
| C | -2.325876 | 3.080183  | 3.573863 |
| H | -2.244936 | 2.761206  | 2.533686 |
| C | -6.787592 | -6.418773 | 1.204211 |
| H | -7.322981 | -7.370750 | 1.224254 |
| O | -8.653594 | -0.082137 | 6.653369 |
| H | -8.509898 | -0.783630 | 5.984495 |
| H | -9.611987 | -0.025576 | 6.708492 |

224

cat1isomersenseAXIALSVP3samef SCF Done: -12499.8220608 A.U.

|    |           |           |           |
|----|-----------|-----------|-----------|
| Cu | 5.580479  | 0.302703  | 3.416205  |
| C  | -5.598892 | 1.472005  | -1.307765 |
| Cu | -3.484191 | -0.325122 | -1.894850 |
| O  | 6.302246  | 1.661862  | 2.164305  |
| C  | 5.810159  | 1.730616  | 1.002909  |
| O  | 4.743243  | 1.180167  | 0.606092  |
| C  | 6.579420  | 2.513228  | -0.010144 |
| O  | -2.657841 | 0.862796  | -3.281641 |
| C  | 7.900705  | 2.889714  | 0.255698  |

|   |           |          |           |
|---|-----------|----------|-----------|
| H | 8.342701  | 2.639909 | 1.220900  |
| O | -4.693705 | 1.254353 | -4.165302 |
| C | 8.045801  | 3.849433 | -1.957669 |
| H | 8.647927  | 4.335942 | -2.726742 |
| C | 6.710224  | 3.502710 | -2.239774 |
| C | 5.990514  | 2.834561 | -1.236166 |
| H | 4.944952  | 2.565250 | -1.388064 |
| C | 6.105406  | 3.814421 | -3.535455 |
| C | 6.394092  | 4.913837 | -4.402859 |
| N | 5.658323  | 4.864314 | -5.503135 |
| N | 4.906871  | 3.752650 | -5.380139 |
| C | 5.125049  | 3.085513 | -4.209793 |
| C | 4.423091  | 1.823834 | -3.875295 |
| H | 3.451514  | 1.997635 | -3.384382 |
| H | 5.022378  | 1.208762 | -3.192220 |
| H | 4.225523  | 1.216979 | -4.771030 |
| C | 7.335981  | 6.047098 | -4.203802 |
| H | 8.375067  | 5.779702 | -4.449982 |
| H | 7.332295  | 6.402274 | -3.163779 |
| H | 7.053811  | 6.880973 | -4.857536 |
| C | 3.939103  | 3.463093 | -6.401206 |
| H | 4.294743  | 3.965983 | -7.309337 |
| H | 3.893467  | 2.382287 | -6.585008 |
| N | 2.604659  | 3.922879 | -6.089870 |
| N | 2.405874  | 5.248820 | -5.967841 |
| C | 1.100156  | 5.394561 | -5.793935 |
| C | 0.434828  | 4.132875 | -5.798262 |
| C | 1.448873  | 3.197169 | -5.992776 |
| C | 1.379141  | 1.722499 | -6.133477 |
| H | 1.683137  | 1.189393 | -5.218690 |
| H | 2.006276  | 1.345468 | -6.954344 |

|   |           |          |           |
|---|-----------|----------|-----------|
| H | 0.348148  | 1.415124 | -6.349481 |
| C | 0.516964  | 6.749008 | -5.603777 |
| H | -0.331787 | 6.731414 | -4.906278 |
| H | 0.148241  | 7.179676 | -6.547408 |
| H | 1.278480  | 7.435852 | -5.215340 |
| C | -1.005258 | 3.887095 | -5.687936 |
| C | -1.912329 | 4.716022 | -6.374300 |
| H | -1.526321 | 5.529413 | -6.992946 |
| C | -3.284746 | 4.496532 | -6.307228 |
| H | -3.966345 | 5.150929 | -6.855328 |
| C | -3.789542 | 3.437124 | -5.560799 |
| H | -4.860774 | 3.241517 | -5.504443 |
| C | -2.908332 | 2.606439 | -4.857874 |
| C | -1.529493 | 2.837668 | -4.916685 |
| H | -0.866569 | 2.192501 | -4.335787 |
| C | -3.456565 | 1.484029 | -4.036335 |
| C | 8.625868  | 3.556856 | -0.726540 |
| H | 9.664005  | 3.839993 | -0.538295 |
| O | 4.596554  | 1.680240 | 4.403201  |
| C | 3.628841  | 2.290075 | 3.861222  |
| O | 3.094974  | 2.007457 | 2.753460  |
| C | 3.074203  | 3.443139 | 4.633971  |
| O | -4.360355 | 1.296412 | -1.129192 |
| C | 3.718706  | 3.853040 | 5.807798  |
| H | 4.625606  | 3.336495 | 6.122642  |
| O | -6.354431 | 0.761275 | -2.031893 |
| C | 2.024714  | 5.539175 | 6.131707  |
| H | 1.628361  | 6.375262 | 6.712243  |
| C | 1.356567  | 5.143951 | 4.957911  |
| C | 1.904085  | 4.085766 | 4.215079  |
| H | 1.404121  | 3.724960 | 3.313552  |

|   |           |          |           |
|---|-----------|----------|-----------|
| C | 0.122470  | 5.822864 | 4.556897  |
| C | -0.259022 | 6.231946 | 3.281265  |
| N | -1.469610 | 6.850100 | 3.440699  |
| N | -1.890486 | 6.861194 | 4.719845  |
| C | -0.940386 | 6.246915 | 5.408986  |
| C | -1.084295 | 6.056694 | 6.876556  |
| H | -2.143434 | 6.093832 | 7.157916  |
| H | -0.570577 | 6.842434 | 7.451532  |
| H | -0.666573 | 5.094467 | 7.203504  |
| C | 0.454891  | 6.123184 | 1.986016  |
| H | 0.064780  | 5.317188 | 1.344942  |
| H | 1.515658  | 5.902560 | 2.160238  |
| H | 0.411887  | 7.053562 | 1.400790  |
| C | -2.276645 | 7.532160 | 2.457413  |
| H | -2.507293 | 8.538128 | 2.828834  |
| H | -1.694233 | 7.617167 | 1.532294  |
| N | -3.540235 | 6.901841 | 2.183204  |
| N | -4.606786 | 7.268523 | 2.920904  |
| C | -5.609210 | 6.518484 | 2.489051  |
| C | -5.184581 | 5.635021 | 1.448722  |
| C | -3.826971 | 5.912912 | 1.285161  |
| C | -2.820321 | 5.360783 | 0.347967  |
| H | -2.276782 | 4.500143 | 0.770959  |
| H | -2.066749 | 6.107658 | 0.060304  |
| H | -3.298245 | 5.010238 | -0.575984 |
| C | -6.948524 | 6.655270 | 3.120995  |
| H | -7.438302 | 5.680468 | 3.252877  |
| H | -7.632288 | 7.283321 | 2.529272  |
| H | -6.845065 | 7.129229 | 4.104319  |
| C | -5.998135 | 4.691462 | 0.680778  |
| C | -7.358477 | 4.955292 | 0.428552  |

|    |           |           |           |
|----|-----------|-----------|-----------|
| H  | -7.804241 | 5.877222  | 0.805292  |
| C  | -8.139536 | 4.082887  | -0.323473 |
| H  | -9.191761 | 4.316642  | -0.500983 |
| C  | -7.581907 | 2.934208  | -0.874182 |
| H  | -8.170635 | 2.253760  | -1.489965 |
| C  | -6.229221 | 2.653996  | -0.646941 |
| C  | -5.457324 | 3.511859  | 0.142814  |
| H  | -4.418994 | 3.237874  | 0.332565  |
| C  | 3.189500  | 4.903092  | 6.549640  |
| H  | 3.690926  | 5.233566  | 7.462072  |
| Cu | -5.472713 | -0.385260 | -3.376658 |
| C  | 5.535606  | -1.807707 | 1.586034  |
| Cu | 3.596465  | 0.252285  | 1.919633  |
| O  | -5.989223 | -1.990043 | -2.354165 |
| C  | -5.524848 | -2.131398 | -1.185530 |
| O  | -4.553540 | -1.496111 | -0.688312 |
| C  | -6.211208 | -3.137851 | -0.319057 |
| O  | 2.682026  | -0.669393 | 3.418242  |
| C  | -7.281701 | -3.878470 | -0.836300 |
| H  | -7.574772 | -3.731018 | -1.876210 |
| O  | 4.632815  | -1.104198 | 4.461159  |
| C  | -7.570906 | -4.934522 | 1.314304  |
| H  | -8.099716 | -5.650063 | 1.948719  |
| C  | -6.499935 | -4.201351 | 1.857112  |
| C  | -5.823967 | -3.303884 | 1.015178  |
| H  | -5.011071 | -2.687199 | 1.404468  |
| C  | -6.142756 | -4.355990 | 3.269182  |
| C  | -4.870011 | -4.445277 | 3.829314  |
| N  | -5.070345 | -4.548337 | 5.174262  |
| N  | -6.372883 | -4.532409 | 5.520271  |
| C  | -7.037015 | -4.425478 | 4.377308  |



|   |           |           |          |
|---|-----------|-----------|----------|
| C | -8.521547 | -4.348997 | 4.374855 |
| H | -8.884668 | -4.027220 | 5.358276 |
| H | -8.888894 | -3.642046 | 3.617985 |
| H | -8.990186 | -5.321577 | 4.159025 |
| C | -3.531649 | -4.467214 | 3.193037 |
| H | -2.896060 | -5.273161 | 3.589608 |
| H | -3.630226 | -4.625468 | 2.111840 |
| H | -2.983840 | -3.523969 | 3.345554 |
| C | -4.112487 | -4.764377 | 6.227388 |
| H | -3.785390 | -5.815950 | 6.264007 |
| H | -4.650838 | -4.547517 | 7.161098 |
| N | -2.935466 | -3.949619 | 6.099228 |
| N | -3.064083 | -2.615991 | 5.958366 |
| C | -1.822574 | -2.149545 | 5.899525 |
| C | -0.869484 | -3.202785 | 6.034516 |
| C | -1.633391 | -4.359538 | 6.157249 |
| C | -1.225933 | -5.780592 | 6.274566 |
| H | -1.393934 | -6.194180 | 7.281701 |
| H | -1.765729 | -6.429569 | 5.568303 |
| H | -0.155993 | -5.884886 | 6.056186 |
| C | -1.568415 | -0.694209 | 5.742944 |
| H | -0.719281 | -0.364461 | 6.357472 |
| H | -1.330507 | -0.423797 | 4.703059 |
| H | -2.456832 | -0.120730 | 6.032064 |
| C | 0.590305  | -3.092331 | 6.085884 |
| C | 1.340385  | -3.811864 | 7.034272 |
| H | 0.819632  | -4.448519 | 7.754728 |
| C | 2.727140  | -3.696644 | 7.094644 |
| H | 3.285810  | -4.260938 | 7.844781 |
| C | 3.400807  | -2.851447 | 6.218522 |
| H | 4.485143  | -2.740494 | 6.255765 |

|   |           |           |           |
|---|-----------|-----------|-----------|
| C | 2.673962  | -2.125831 | 5.267109  |
| C | 1.282938  | -2.249791 | 5.204528  |
| H | 0.744471  | -1.686160 | 4.440908  |
| C | 3.385280  | -1.227781 | 4.307064  |
| C | -7.953966 | -4.776775 | -0.014577 |
| H | -8.786395 | -5.361435 | -0.412769 |
| O | -4.359667 | -1.483176 | -4.578930 |
| C | -3.358872 | -2.082628 | -4.092090 |
| O | -2.875496 | -1.913528 | -2.937278 |
| C | -2.688756 | -3.078956 | -4.981605 |
| O | 4.333399  | -1.525917 | 1.323546  |
| C | -3.156806 | -3.270133 | -6.287265 |
| H | -4.016619 | -2.694713 | -6.631780 |
| O | 6.331294  | -1.112895 | 2.282701  |
| C | -1.422433 | -4.909386 | -6.652913 |
| H | -0.944801 | -5.643475 | -7.306019 |
| C | -0.939026 | -4.739883 | -5.342407 |
| C | -1.586081 | -3.804602 | -4.520302 |
| H | -1.222788 | -3.610481 | -3.509049 |
| C | 0.204310  | -5.520068 | -4.866068 |
| C | 0.358917  | -6.125837 | -3.620939 |
| N | 1.572378  | -6.754991 | -3.667320 |
| N | 2.204644  | -6.595188 | -4.845075 |
| C | 1.390848  | -5.853959 | -5.583427 |
| C | 1.781183  | -5.460211 | -6.962864 |
| H | 2.871977  | -5.495018 | -7.069778 |
| H | 1.362106  | -6.137269 | -7.723050 |
| H | 1.434684  | -4.447075 | -7.209571 |
| C | -0.563845 | -6.188404 | -2.461384 |
| H | -0.287079 | -5.494863 | -1.651549 |
| H | -1.579516 | -5.916899 | -2.775587 |

|   |           |           |           |
|---|-----------|-----------|-----------|
| H | -0.621202 | -7.195613 | -2.023441 |
| C | 2.190981  | -7.597480 | -2.671511 |
| H | 2.403777  | -8.581464 | -3.107890 |
| H | 1.483691  | -7.719129 | -1.841380 |
| N | 3.445956  | -7.098202 | -2.182490 |
| N | 4.581428  | -7.563902 | -2.738227 |
| C | 5.562063  | -6.912460 | -2.131546 |
| C | 5.051775  | -5.991379 | -1.163716 |
| C | 3.667192  | -6.138679 | -1.236369 |
| C | 2.565605  | -5.491641 | -0.486353 |
| H | 2.134681  | -4.634285 | -1.029288 |
| H | 1.740790  | -6.190405 | -0.283075 |
| H | 2.919641  | -5.114878 | 0.481422  |
| C | 6.970521  | -7.172561 | -2.532547 |
| H | 7.567561  | -6.250184 | -2.543290 |
| H | 7.478644  | -7.878094 | -1.857191 |
| H | 6.993219  | -7.614562 | -3.535780 |
| C | 5.817597  | -5.131639 | -0.259478 |
| C | 7.069914  | -5.556962 | 0.224453  |
| H | 7.448054  | -6.539383 | -0.062550 |
| C | 7.820986  | -4.766682 | 1.088072  |
| H | 8.789121  | -5.124548 | 1.445662  |
| C | 7.335204  | -3.535970 | 1.514490  |
| H | 7.901462  | -2.908426 | 2.202914  |
| C | 6.083270  | -3.097897 | 1.065298  |
| C | 5.343016  | -3.881926 | 0.174295  |
| H | 4.390481  | -3.490458 | -0.186983 |
| C | -2.514037 | -4.181868 | -7.118414 |
| H | -2.873594 | -4.336837 | -8.138201 |

224

cat1isomersenseAXIALSVP4same SCF Done: -12499.8198877 A.U.

|    |           |           |           |
|----|-----------|-----------|-----------|
| Cu | 5.938003  | -0.217656 | -2.796133 |
| C  | -5.373034 | 2.478321  | 1.242202  |
| Cu | -3.745043 | 0.197877  | 1.622879  |
| O  | 4.903781  | -0.720648 | -4.394888 |
| C  | 3.741846  | -1.200102 | -4.255508 |
| O  | 3.079536  | -1.252744 | -3.181787 |
| C  | 3.100525  | -1.741170 | -5.492320 |
| O  | -4.694365 | -0.907654 | 0.249721  |
| C  | 3.790000  | -1.684636 | -6.709783 |
| H  | 4.795774  | -1.264131 | -6.730463 |
| O  | -6.717174 | -0.339083 | 1.066365  |
| C  | 1.893339  | -2.689304 | -7.813245 |
| H  | 1.432978  | -3.079523 | -8.723934 |
| C  | 1.183127  | -2.763042 | -6.600875 |
| C  | 1.807789  | -2.273738 | -5.443247 |
| H  | 1.281050  | -2.277227 | -4.486586 |
| C  | -0.167938 | -3.327526 | -6.575004 |
| C  | -1.207042 | -3.121926 | -7.530297 |
| N  | -2.292763 | -3.812259 | -7.213373 |
| N  | -1.982603 | -4.465194 | -6.077638 |
| C  | -0.710550 | -4.209498 | -5.643203 |
| C  | -0.100297 | -4.843282 | -4.449315 |
| H  | -0.451745 | -4.405850 | -3.501649 |
| H  | 0.988999  | -4.715186 | -4.472402 |
| H  | -0.295331 | -5.924816 | -4.401011 |
| C  | -1.195452 | -2.255524 | -8.738514 |
| H  | -0.752637 | -2.761699 | -9.610067 |
| H  | -0.615542 | -1.336936 | -8.573222 |
| H  | -2.220571 | -1.980823 | -9.014264 |
| C  | -2.952165 | -5.388633 | -5.536787 |
| H  | -3.252253 | -6.093897 | -6.321931 |

|   |           |           |           |
|---|-----------|-----------|-----------|
| H | -2.476020 | -5.944958 | -4.720206 |
| N | -4.161505 | -4.768430 | -5.069534 |
| N | -5.195673 | -4.661928 | -5.926491 |
| C | -6.145422 | -4.028308 | -5.255325 |
| C | -5.716486 | -3.705929 | -3.930125 |
| C | -4.414288 | -4.200153 | -3.853184 |
| C | -3.432358 | -4.214177 | -2.743468 |
| H | -2.739474 | -3.357544 | -2.781264 |
| H | -2.817766 | -5.125965 | -2.747305 |
| H | -3.940447 | -4.170708 | -1.771749 |
| C | -7.434875 | -3.720728 | -5.929628 |
| H | -7.813053 | -2.726940 | -5.652369 |
| H | -8.224344 | -4.447182 | -5.682572 |
| H | -7.298425 | -3.751239 | -7.017190 |
| C | -6.488761 | -3.052179 | -2.872522 |
| C | -7.884437 | -3.226312 | -2.797657 |
| H | -8.383061 | -3.870084 | -3.523964 |
| C | -8.638406 | -2.622841 | -1.796110 |
| H | -9.719419 | -2.777093 | -1.766173 |
| C | -8.021005 | -1.846628 | -0.821537 |
| H | -8.591832 | -1.381281 | -0.017617 |
| C | -6.632359 | -1.672761 | -0.861893 |
| C | -5.881438 | -2.253627 | -1.888778 |
| H | -4.807803 | -2.061445 | -1.911132 |
| C | -5.957357 | -0.905614 | 0.228570  |
| C | 3.178174  | -2.156840 | -7.866062 |
| H | 3.710449  | -2.117806 | -8.819153 |
| O | 5.565242  | 1.688890  | -3.162805 |
| C | 4.377701  | 2.118006  | -3.091665 |
| O | 3.382289  | 1.486356  | -2.639549 |
| C | 4.151399  | 3.511371  | -3.583516 |

|   |           |          |           |
|---|-----------|----------|-----------|
| O | -4.395583 | 1.856890 | 0.737637  |
| C | 5.244442  | 4.280545 | -4.001093 |
| H | 6.241931  | 3.841027 | -3.976836 |
| O | -6.073004 | 2.100602 | 2.225384  |
| C | 3.755393  | 6.124220 | -4.454443 |
| H | 3.603039  | 7.142865 | -4.818703 |
| C | 2.639733  | 5.367991 | -4.049814 |
| C | 2.862602  | 4.055588 | -3.604614 |
| H | 2.032132  | 3.444031 | -3.245409 |
| C | 1.300293  | 5.958205 | -4.099718 |
| C | 0.123009  | 5.371599 | -4.558771 |
| N | -0.836161 | 6.341808 | -4.452741 |
| N | -0.360840 | 7.500124 | -3.956955 |
| C | 0.929035  | 7.287706 | -3.740668 |
| C | 1.780097  | 8.365390 | -3.170489 |
| H | 1.160264  | 9.080768 | -2.616815 |
| H | 2.308806  | 8.934951 | -3.950217 |
| H | 2.545508  | 7.963140 | -2.492572 |
| C | -0.119620 | 4.020261 | -5.119384 |
| H | -0.599296 | 3.335942 | -4.402120 |
| H | 0.833041  | 3.558152 | -5.407511 |
| H | -0.751153 | 4.043347 | -6.019537 |
| C | -2.214394 | 6.303214 | -4.881759 |
| H | -2.398916 | 7.144888 | -5.560716 |
| H | -2.378899 | 5.364158 | -5.423786 |
| N | -3.169930 | 6.429102 | -3.815213 |
| N | -3.614197 | 7.661635 | -3.500513 |
| C | -4.435559 | 7.489208 | -2.476064 |
| C | -4.522371 | 6.110497 | -2.107778 |
| C | -3.676321 | 5.454816 | -3.002574 |
| C | -3.347591 | 4.019542 | -3.170507 |

|    |           |           |           |
|----|-----------|-----------|-----------|
| H  | -2.449707 | 3.722480  | -2.604078 |
| H  | -3.165653 | 3.756808  | -4.222430 |
| H  | -4.171101 | 3.386593  | -2.815816 |
| C  | -5.089468 | 8.673511  | -1.858293 |
| H  | -5.125443 | 8.594404  | -0.762828 |
| H  | -6.124691 | 8.813247  | -2.205902 |
| H  | -4.534894 | 9.581153  | -2.124646 |
| C  | -5.345587 | 5.512898  | -1.055598 |
| C  | -6.579671 | 6.089083  | -0.696171 |
| H  | -6.931909 | 6.975045  | -1.226665 |
| C  | -7.376671 | 5.534450  | 0.300482  |
| H  | -8.328234 | 6.006105  | 0.556127  |
| C  | -6.980246 | 4.373223  | 0.955318  |
| H  | -7.598536 | 3.914520  | 1.727457  |
| C  | -5.768935 | 3.768083  | 0.600589  |
| C  | -4.955958 | 4.344638  | -0.380059 |
| H  | -4.000149 | 3.866998  | -0.598702 |
| C  | 5.039235  | 5.588212  | -4.428000 |
| H  | 5.887248  | 6.194745  | -4.753887 |
| Cu | -5.936570 | 0.216654  | 2.791622  |
| C  | 5.372140  | -2.483521 | -1.254486 |
| Cu | 3.747362  | -0.198834 | -1.625526 |
| O  | -4.901072 | 0.728322  | 4.385854  |
| C  | -3.740601 | 1.211608  | 4.246567  |
| O  | -3.075589 | 1.259637  | 3.174373  |
| C  | -3.106113 | 1.763892  | 5.482027  |
| O  | 4.694081  | 0.898664  | -0.245979 |
| C  | -3.805311 | 1.722397  | 6.694576  |
| H  | -4.812035 | 1.304148  | 6.712095  |
| O  | 6.715337  | 0.328925  | -1.065634 |
| C  | -1.915638 | 2.736206  | 7.801188  |

|   |           |          |          |
|---|-----------|----------|----------|
| H | -1.461757 | 3.136166 | 8.710801 |
| C | -1.194905 | 2.794054 | 6.593934 |
| C | -1.811860 | 2.293209 | 5.436909 |
| H | -1.278468 | 2.284642 | 4.484034 |
| C | 0.156686  | 3.356755 | 6.574187 |
| C | 0.714580  | 4.214215 | 5.628253 |
| N | 1.978130  | 4.485068 | 6.078467 |
| N | 2.268902  | 3.863131 | 7.236810 |
| C | 1.178939  | 3.179426 | 7.553050 |
| C | 1.148637  | 2.347014 | 8.784607 |
| H | 2.169478  | 2.080132 | 9.083045 |
| H | 0.693379  | 2.877780 | 9.634910 |
| H | 0.570711  | 1.424203 | 8.636719 |
| C | 0.123089  | 4.807948 | 4.404737 |
| H | 0.449719  | 4.305547 | 3.480707 |
| H | -0.970587 | 4.725335 | 4.439035 |
| H | 0.361399  | 5.876076 | 4.295864 |
| C | 2.959834  | 5.391354 | 5.531235 |
| H | 2.493931  | 5.946988 | 4.708589 |
| H | 3.264755  | 6.098398 | 6.312567 |
| N | 5.191206  | 4.636229 | 5.936553 |
| N | 4.164177  | 4.754058 | 5.072340 |
| C | 4.420837  | 4.185706 | 3.856722 |
| C | 5.717905  | 3.679262 | 3.942280 |
| C | 6.139746  | 3.994593 | 5.271350 |
| C | 7.420969  | 3.673825 | 5.955110 |
| H | 8.220569  | 4.389999 | 5.710653 |
| H | 7.277772  | 3.709797 | 7.041624 |
| H | 7.789221  | 2.674669 | 5.683775 |
| C | 3.447766  | 4.207560 | 2.739295 |
| H | 3.964278  | 4.185371 | 1.771109 |



|   |           |           |           |
|---|-----------|-----------|-----------|
| H | 2.764928  | 3.342325  | 2.757035  |
| H | 2.821711  | 5.111223  | 2.752887  |
| C | 6.491288  | 3.020017  | 2.888814  |
| C | 7.889611  | 3.176766  | 2.825746  |
| H | 8.390661  | 3.810788  | 3.558851  |
| C | 8.643845  | 2.568362  | 1.827331  |
| H | 9.726874  | 2.709377  | 1.806437  |
| C | 8.024582  | 1.804318  | 0.844367  |
| H | 8.595864  | 1.335762  | 0.042618  |
| C | 6.633721  | 1.647134  | 0.873543  |
| C | 5.882014  | 2.233139  | 1.896935  |
| H | 4.805967  | 2.054458  | 1.909489  |
| C | 5.957093  | 0.891743  | -0.224017 |
| C | -3.201845 | 2.207130  | 7.850028  |
| H | -3.741742 | 2.180542  | 8.799258  |
| O | -5.561088 | -1.687625 | 3.166114  |
| C | -4.372738 | -2.114943 | 3.096971  |
| O | -3.378196 | -1.483063 | 2.643340  |
| C | -4.144612 | -3.506381 | 3.593465  |
| O | 4.396266  | -1.861868 | -0.747021 |
| C | -5.236223 | -4.273691 | 4.018226  |
| H | -6.233687 | -3.834022 | 3.996058  |
| O | 6.071727  | -2.104122 | -2.237233 |
| C | -3.746044 | -6.116098 | 4.472589  |
| H | -3.592490 | -7.133455 | 4.839951  |
| C | -2.631811 | -5.361859 | 4.060411  |
| C | -2.855878 | -4.050911 | 3.611579  |
| H | -2.026508 | -3.440903 | 3.247183  |
| C | -1.292660 | -5.953193 | 4.106462  |
| C | -0.113062 | -5.367346 | 4.560347  |
| N | 0.844513  | -6.338984 | 4.452587  |

|   |           |           |           |
|---|-----------|-----------|-----------|
| N | 0.365947  | -7.497535 | 3.960526  |
| C | -0.924389 | -7.283793 | 3.748347  |
| C | -1.778820 | -8.361352 | 3.182969  |
| H | -1.161844 | -9.078241 | 2.628055  |
| H | -2.305220 | -8.929196 | 3.965500  |
| H | -2.546280 | -7.959316 | 2.507262  |
| C | 0.133368  | -4.015384 | 5.117749  |
| H | 0.615277  | -3.334246 | 4.398964  |
| H | -0.818014 | -3.549861 | 5.404542  |
| H | 0.764583  | -4.038152 | 6.018163  |
| C | 2.224125  | -6.301603 | 4.877194  |
| H | 2.409620  | -7.142515 | 5.556834  |
| H | 2.391650  | -5.361986 | 5.417308  |
| N | 3.176165  | -6.430238 | 3.807797  |
| N | 3.616439  | -7.663960 | 3.492225  |
| C | 4.434603  | -7.494028 | 2.464810  |
| C | 4.523290  | -6.115740 | 2.095359  |
| C | 3.681975  | -5.457569 | 2.992882  |
| C | 3.357327  | -4.021431 | 3.161537  |
| H | 2.459120  | -3.721971 | 2.596886  |
| H | 3.178078  | -3.758334 | 4.213820  |
| H | 4.181755  | -3.390516 | 2.805369  |
| C | 5.083576  | -8.680295 | 1.845610  |
| H | 5.114477  | -8.602825 | 0.749864  |
| H | 6.120195  | -8.821340 | 2.188496  |
| H | 4.528664  | -9.586566 | 2.115894  |
| C | 5.344066  | -5.520490 | 1.039950  |
| C | 6.574732  | -6.100432 | 0.674861  |
| H | 6.926322  | -6.987988 | 1.203093  |
| C | 7.369391  | -5.547575 | -0.324667 |
| H | 8.318258  | -6.022240 | -0.584720 |

|   |           |           |           |
|---|-----------|-----------|-----------|
| C | 6.974304  | -4.384302 | -0.976696 |
| H | 7.591066  | -3.926749 | -1.750750 |
| C | 5.766368  | -3.775626 | -0.616555 |
| C | 4.955406  | -4.350616 | 0.366667  |
| H | 4.001914  | -3.870258 | 0.589224  |
| C | -5.029776 | -5.579702 | 4.449504  |
| H | -5.876668 | -6.184611 | 4.781266  |

2

CO SCF Done: -113.209487992 A.U.

|   |          |          |           |
|---|----------|----------|-----------|
| O | 0.000000 | 0.000000 | 0.485740  |
| C | 0.000000 | 0.000000 | -0.647654 |

3

CO2 SCF Done: -188.435335300 A.U.

|   |          |          |           |
|---|----------|----------|-----------|
| O | 0.000000 | 0.000000 | 1.162407  |
| C | 0.000000 | 0.000000 | 0.000000  |
| O | 0.000000 | 0.000000 | -1.162407 |

2

N2 SCF Done: -109.427342079 A.U.

|   |          |          |           |
|---|----------|----------|-----------|
| N | 0.000000 | 0.000000 | 0.552185  |
| N | 0.000000 | 0.000000 | -0.552185 |

2

H2 SCF Done: -1.16720776949 A.U.

|   |          |          |           |
|---|----------|----------|-----------|
| H | 0.000000 | 0.000000 | 0.377264  |
| H | 0.000000 | 0.000000 | -0.377264 |

54

trosTRANS+CO2 SCF Done: -1297.43342243 A.U.

|   |           |           |           |
|---|-----------|-----------|-----------|
| C | -5.805124 | -1.923627 | -1.797606 |
| C | -6.691798 | -0.847600 | -1.806105 |
| H | -7.625920 | -0.907453 | -2.369429 |
| C | -5.188105 | 0.377849  | -0.365012 |
| H | -4.968479 | 1.271242  | 0.225743  |

|   |           |           |           |
|---|-----------|-----------|-----------|
| C | -4.278166 | -0.694186 | -0.351226 |
| C | -4.613002 | -1.847700 | -1.081950 |
| H | -3.915495 | -2.688747 | -1.103926 |
| C | -3.033175 | -0.613595 | 0.416796  |
| C | -2.190085 | 0.487564  | 0.544779  |
| N | -1.205962 | 0.102021  | 1.406850  |
| N | -1.346918 | -1.170968 | 1.834907  |
| C | -2.444523 | -1.620432 | 1.238979  |
| C | -2.931170 | -2.999713 | 1.499653  |
| H | -2.517583 | -3.377576 | 2.442704  |
| H | -4.027865 | -3.036422 | 1.556863  |
| H | -2.628972 | -3.702562 | 0.708035  |
| C | -2.205425 | 1.822858  | -0.098109 |
| H | -1.207372 | 2.084686  | -0.479865 |
| H | -2.906921 | 1.831665  | -0.941287 |
| H | -2.514322 | 2.622080  | 0.595132  |
| C | -0.053052 | 0.859317  | 1.819535  |
| H | 0.200498  | 0.542094  | 2.838323  |
| H | -0.302677 | 1.926253  | 1.831095  |
| N | 1.099619  | 0.693298  | 0.970459  |
| N | 1.250768  | 1.498114  | -0.106705 |
| C | 2.320518  | 1.031913  | -0.744791 |
| C | 2.878136  | -0.087126 | -0.060490 |
| C | 2.048235  | -0.283448 | 1.040726  |
| C | 2.055772  | -1.311206 | 2.108627  |
| H | 2.480515  | -0.931178 | 3.052213  |
| H | 1.038545  | -1.670970 | 2.321526  |
| H | 2.666012  | -2.170353 | 1.803718  |
| C | 2.809292  | 1.679278  | -1.989645 |
| H | 3.906620  | 1.662437  | -2.044973 |
| H | 2.437547  | 1.165090  | -2.889455 |

|   |           |           |           |
|---|-----------|-----------|-----------|
| H | 2.469625  | 2.719482  | -2.048396 |
| C | 4.083788  | -0.844398 | -0.405018 |
| C | 4.981588  | -1.265989 | 0.592120  |
| H | 4.786692  | -0.999276 | 1.634219  |
| C | 6.128979  | -1.985873 | 0.270491  |
| H | 6.811809  | -2.297979 | 1.064629  |
| C | 6.415797  | -2.294741 | -1.058822 |
| H | 7.317952  | -2.856241 | -1.312242 |
| C | 5.541435  | -1.877532 | -2.061687 |
| C | 4.389864  | -1.163962 | -1.739652 |
| H | 3.699849  | -0.866085 | -2.532792 |
| C | -6.376702 | 0.304357  | -1.086187 |
| H | -7.069015 | 1.149887  | -1.075782 |
| O | 1.314000  | 4.601090  | -0.802073 |
| C | 0.755350  | 4.352364  | 0.185070  |
| O | 0.183795  | 4.160603  | 1.180914  |
| H | 5.753269  | -2.117304 | -3.106610 |
| H | -6.039779 | -2.829791 | -2.361615 |

53

trosTRANS+CO SCF Done: -1222.20347959 A.U.

|   |           |           |           |
|---|-----------|-----------|-----------|
| C | -5.751230 | -1.896755 | -1.747703 |
| C | -6.647588 | -0.829295 | -1.782837 |
| H | -7.583940 | -0.913977 | -2.339255 |
| C | -5.148103 | 0.450484  | -0.385347 |
| H | -4.933573 | 1.362653  | 0.177944  |
| C | -4.229316 | -0.613241 | -0.343598 |
| C | -4.556718 | -1.789922 | -1.039996 |
| H | -3.852144 | -2.625262 | -1.040508 |
| C | -2.984154 | -0.501562 | 0.420083  |
| C | -2.151821 | 0.610894  | 0.521488  |
| N | -1.165139 | 0.255077  | 1.393656  |

|   |           |           |           |
|---|-----------|-----------|-----------|
| N | -1.293395 | -1.008821 | 1.852011  |
| C | -2.386251 | -1.482722 | 1.266530  |
| C | -2.859610 | -2.860070 | 1.559866  |
| H | -2.444668 | -3.210709 | 2.512787  |
| H | -3.956044 | -2.906518 | 1.615169  |
| H | -2.548139 | -3.578803 | 0.786293  |
| C | -2.180175 | 1.930604  | -0.152606 |
| H | -1.180671 | 2.206808  | -0.520432 |
| H | -2.865622 | 1.905611  | -1.008548 |
| H | -2.520423 | 2.739567  | 0.514676  |
| C | -0.017789 | 1.029360  | 1.788395  |
| H | 0.242906  | 0.729613  | 2.810807  |
| H | -0.280656 | 2.094160  | 1.786202  |
| N | 1.131982  | 0.866596  | 0.936508  |
| N | 1.266611  | 1.665761  | -0.144363 |
| C | 2.355699  | 1.231746  | -0.768853 |
| C | 2.941339  | 0.132927  | -0.073512 |
| C | 2.108741  | -0.081248 | 1.022952  |
| C | 2.135013  | -1.100444 | 2.098735  |
| H | 2.554433  | -0.707250 | 3.039393  |
| H | 1.124045  | -1.475380 | 2.315638  |
| H | 2.759029  | -1.951865 | 1.799718  |
| C | 2.832166  | 1.906936  | -2.003548 |
| H | 3.929446  | 1.950193  | -2.041018 |
| H | 2.501598  | 1.383773  | -2.914123 |
| H | 2.438713  | 2.929772  | -2.055186 |
| C | 4.167904  | -0.594546 | -0.407501 |
| C | 5.067045  | -0.998277 | 0.595918  |
| H | 4.859109  | -0.737064 | 1.636858  |
| C | 6.231594  | -1.693453 | 0.281899  |
| H | 6.914941  | -1.992057 | 1.080802  |

|   |           |           |           |
|---|-----------|-----------|-----------|
| C | 6.534655  | -1.994843 | -1.045546 |
| H | 7.449981  | -2.537581 | -1.292603 |
| C | 5.659664  | -1.593968 | -2.054572 |
| C | 4.491295  | -0.905070 | -1.740253 |
| H | 3.801177  | -0.620741 | -2.538322 |
| C | -6.339260 | 0.345782  | -1.098390 |
| H | -7.038615 | 1.185440  | -1.109434 |
| C | 0.834800  | 4.649052  | -0.158459 |
| O | 0.062136  | 4.606702  | 0.672777  |
| H | 5.884402  | -1.827711 | -3.098164 |
| H | -5.980178 | -2.820796 | -2.284452 |

54

trosTRANS+H2O SCF Done: -1185.35452718 A.U.

|   |           |           |           |
|---|-----------|-----------|-----------|
| C | -5.565164 | -1.512956 | -2.072056 |
| C | -6.534766 | -0.526932 | -1.891639 |
| H | -7.448272 | -0.535546 | -2.490618 |
| C | -5.163765 | 0.479986  | -0.173639 |
| H | -5.029545 | 1.248132  | 0.592162  |
| C | -4.169652 | -0.498941 | -0.350371 |
| C | -4.398151 | -1.497947 | -1.313475 |
| H | -3.633219 | -2.259100 | -1.485198 |
| C | -2.934355 | -0.486313 | 0.436747  |
| C | -2.184225 | 0.624394  | 0.818178  |
| N | -1.145641 | 0.129169  | 1.556006  |
| N | -1.170247 | -1.217614 | 1.667496  |
| C | -2.243531 | -1.604746 | 0.990733  |
| C | -2.609746 | -3.043210 | 0.920879  |
| H | -2.163622 | -3.592058 | 1.759220  |
| H | -3.699240 | -3.182991 | 0.947639  |
| H | -2.249691 | -3.518177 | -0.004760 |
| C | -2.380545 | 2.067983  | 0.548085  |

|   |           |           |           |
|---|-----------|-----------|-----------|
| H | -1.445725 | 2.613226  | 0.357516  |
| H | -3.014024 | 2.200784  | -0.337814 |
| H | -2.890158 | 2.578563  | 1.381755  |
| C | -0.016662 | 0.833769  | 2.099148  |
| H | 0.247255  | 0.361525  | 3.053775  |
| H | -0.295845 | 1.878685  | 2.281792  |
| N | 1.144003  | 0.838062  | 1.242696  |
| N | 1.256576  | 1.800509  | 0.303611  |
| C | 2.328854  | 1.486598  | -0.413690 |
| C | 2.930618  | 0.290961  | 0.076434  |
| C | 2.125562  | -0.104926 | 1.144267  |
| C | 2.184941  | -1.287436 | 2.035056  |
| H | 2.626024  | -1.049445 | 3.016711  |
| H | 1.181124  | -1.702476 | 2.205140  |
| H | 2.806297  | -2.070850 | 1.583980  |
| C | 2.760104  | 2.370368  | -1.527659 |
| H | 3.851579  | 2.497581  | -1.544517 |
| H | 2.470579  | 1.963878  | -2.508377 |
| H | 2.283243  | 3.354865  | -1.435664 |
| C | 4.141297  | -0.368640 | -0.418507 |
| C | 5.071546  | -0.947565 | 0.463444  |
| H | 4.904547  | -0.875349 | 1.541324  |
| C | 6.216611  | -1.580013 | -0.013141 |
| H | 6.925649  | -2.018111 | 0.693633  |
| C | 6.468126  | -1.641262 | -1.383145 |
| H | 7.368429  | -2.134180 | -1.757096 |
| C | 5.561672  | -1.063221 | -2.271601 |
| C | 4.413351  | -0.437006 | -1.796128 |
| H | 3.698554  | -0.012079 | -2.504526 |
| C | -6.328059 | 0.468689  | -0.937421 |
| H | -7.085490 | 1.240444  | -0.779437 |



|   |           |           |           |
|---|-----------|-----------|-----------|
| H | 0.492019  | 3.501199  | -0.010346 |
| O | 0.130631  | 4.375149  | -0.260244 |
| H | 0.384816  | 4.933335  | 0.481271  |
| H | 5.746071  | -1.107513 | -3.347745 |
| H | -5.713596 | -2.296215 | -2.819528 |

53

trostrANS+H2 SCF Done: -1110.15829259 A.U.

|   |           |           |           |
|---|-----------|-----------|-----------|
| C | -5.632085 | 1.419683  | 1.980228  |
| C | -6.546998 | 0.371116  | 1.889681  |
| H | -7.466799 | 0.389599  | 2.478744  |
| C | -5.107172 | -0.721384 | 0.285212  |
| H | -4.923475 | -1.549347 | -0.404909 |
| C | -4.168651 | 0.322693  | 0.370695  |
| C | -4.458371 | 1.395540  | 1.231799  |
| H | -3.737203 | 2.210557  | 1.330930  |
| C | -2.937604 | 0.297364  | -0.422317 |
| C | -2.135624 | -0.807050 | -0.699207 |
| N | -1.143801 | -0.347263 | -1.516518 |
| N | -1.240901 | 0.975036  | -1.774361 |
| C | -2.318059 | 1.380933  | -1.113869 |
| C | -2.757109 | 2.798381  | -1.191429 |
| H | -2.312363 | 3.286403  | -2.067234 |
| H | -3.850880 | 2.879664  | -1.261574 |
| H | -2.450585 | 3.377255  | -0.306660 |
| C | -2.194734 | -2.213620 | -0.235603 |
| H | -1.200094 | -2.572685 | 0.067734  |
| H | -2.867979 | -2.301958 | 0.625999  |
| H | -2.570334 | -2.899168 | -1.013017 |
| C | -0.005716 | -1.072225 | -2.015745 |
| H | 0.263631  | -0.634284 | -2.984674 |
| H | -0.281160 | -2.123608 | -2.163404 |

|   |           |           |           |
|---|-----------|-----------|-----------|
| N | 1.141545  | -1.042317 | -1.145507 |
| N | 1.250039  | -1.973293 | -0.173195 |
| C | 2.329293  | -1.632346 | 0.519918  |
| C | 2.936327  | -0.457911 | -0.018147 |
| C | 2.126244  | -0.099382 | -1.094154 |
| C | 2.180423  | 1.047945  | -2.030685 |
| H | 2.608785  | 0.771578  | -3.008082 |
| H | 1.177132  | 1.461592  | -2.209348 |
| H | 2.810156  | 1.845589  | -1.617411 |
| C | 2.779176  | -2.464661 | 1.665696  |
| H | 3.875103  | -2.529844 | 1.711771  |
| H | 2.442181  | -2.057017 | 2.631228  |
| H | 2.370683  | -3.479503 | 1.584112  |
| C | 4.158557  | 0.208950  | 0.435542  |
| C | 5.086491  | 0.732405  | -0.482829 |
| H | 4.904131  | 0.612704  | -1.554033 |
| C | 6.247776  | 1.367044  | -0.050557 |
| H | 6.954237  | 1.760902  | -0.785439 |
| C | 6.518343  | 1.487002  | 1.311979  |
| H | 7.431298  | 1.981442  | 1.651725  |
| C | 5.613785  | 0.966179  | 2.237021  |
| C | 4.449023  | 0.337887  | 1.805282  |
| H | 3.736128  | -0.042216 | 2.540855  |
| C | -6.277952 | -0.699836 | 1.038256  |
| H | -6.993241 | -1.521394 | 0.949720  |
| H | 0.506296  | -4.317496 | -1.026299 |
| H | 0.231396  | -4.941682 | -1.359348 |
| H | 5.812887  | 1.057245  | 3.307719  |
| H | -5.830290 | 2.262306  | 2.647360  |

53

trostrans+N2 SCF Done: -1218.42021061 A.U.

|   |           |           |           |
|---|-----------|-----------|-----------|
| C | -5.753520 | -1.843028 | -1.803036 |
| C | -6.646553 | -0.772247 | -1.799448 |
| H | -7.582270 | -0.832847 | -2.360045 |
| C | -5.145091 | 0.449795  | -0.353224 |
| H | -4.928472 | 1.339572  | 0.244028  |
| C | -4.228987 | -0.617166 | -0.351052 |
| C | -4.559535 | -1.766328 | -1.090582 |
| H | -3.857284 | -2.603067 | -1.122302 |
| C | -2.983140 | -0.535322 | 0.415109  |
| C | -2.152390 | 0.573493  | 0.558032  |
| N | -1.164201 | 0.186483  | 1.414825  |
| N | -1.289602 | -1.094179 | 1.824346  |
| C | -2.382185 | -1.547423 | 1.222037  |
| C | -2.852445 | -2.936030 | 1.462544  |
| H | -2.429680 | -3.324623 | 2.397111  |
| H | -3.948416 | -2.985740 | 1.524701  |
| H | -2.546965 | -3.622407 | 0.657849  |
| C | -2.181604 | 1.917959  | -0.065291 |
| H | -1.181122 | 2.208483  | -0.419787 |
| H | -2.865505 | 1.925605  | -0.922969 |
| H | -2.524656 | 2.699384  | 0.632816  |
| C | -0.016322 | 0.947405  | 1.833445  |
| H | 0.246165  | 0.615113  | 2.845265  |
| H | -0.278322 | 2.012026  | 1.864929  |
| N | 1.131129  | 0.812645  | 0.974150  |
| N | 1.260480  | 1.645230  | -0.080939 |
| C | 2.349996  | 1.234385  | -0.718967 |
| C | 2.942836  | 0.117713  | -0.057619 |
| C | 2.112202  | -0.132861 | 1.032741  |
| C | 2.144479  | -1.183837 | 2.077446  |
| H | 2.558107  | -0.816171 | 3.030923  |

|   |           |           |           |
|---|-----------|-----------|-----------|
| H | 1.136154  | -1.573698 | 2.279760  |
| H | 2.776223  | -2.020563 | 1.754213  |
| C | 2.821379  | 1.950768  | -1.932637 |
| H | 3.917804  | 2.017508  | -1.962423 |
| H | 2.506856  | 1.447247  | -2.859806 |
| H | 2.407232  | 2.966619  | -1.960822 |
| C | 4.173825  | -0.590541 | -0.415054 |
| C | 5.078491  | -1.017149 | 0.573721  |
| H | 4.870491  | -0.789870 | 1.622581  |
| C | 6.248805  | -1.691474 | 0.236512  |
| H | 6.936429  | -2.008411 | 1.024589  |
| C | 6.552060  | -1.949227 | -1.099988 |
| H | 7.471744  | -2.475861 | -1.365126 |
| C | 5.671420  | -1.525406 | -2.094658 |
| C | 4.497491  | -0.857188 | -1.757307 |
| H | 3.803436  | -0.553595 | -2.544857 |
| C | -6.335553 | 0.375538  | -1.071085 |
| H | -7.032669 | 1.216965  | -1.051300 |
| N | 0.588317  | 5.010127  | -0.132211 |
| N | 0.116649  | 4.585084  | 0.771287  |
| H | 5.896175  | -1.724650 | -3.145435 |
| H | -5.984819 | -2.745729 | -2.373934 |
